# Supplementary material for: Transcriptome Profiling of the Ovarian Cells at the Single-Cell Resolution in Adult Asian Seabass
Source: Front Cell Dev Biol. 2021 Mar 29;9:647892. doi: 10.3389/fcell.2021.647892 (PMC8039529; doi:10.3389/fcell.2021.647892)
Supplement: Supplementary file 7 [file Table_4.XLSX]

## Sheet: enrichment_results_wg_result157
Table S4 Signaling pathways based on KEGG analysis.
geneSet	description	enrichmentScore	normalizedEnrichmentScore	pValue	size	userId
dre01040	Biosynthesis of unsaturated fatty acids	-0.548269	-1.41951	0.039604	6	acaa1;acox1;acox3;elovl6;hacd1;hsd17b4
dre04216	Ferroptosis	0.890953	1.52047	0.0423913	8	acsl5;map1lc3c;pcbp2;vdac2
dre04115	p53 signaling pathway	0.839101	1.4869	0.0150905	24	ccnb1;ccng1;cdk1;siva1
dre03320	PPAR signaling pathway	0.869566	1.52355	0.0192113	17	acsl5;plin2;ubb
dre04914	Progesterone-mediated oocyte maturation	0.856598	1.52782	0.00600601	36	ccna2;ccnb1;cdc26;cdk1;hsp90ab1;kif22;kras;mos
dre04110	Cell cycle	0.782388	1.39832	0.011	56	bub3;ccna2;ccnb1;ccnb3;cdc20;cdc26;cdk1;hdac1;mcm4;mcm7;orc3;pcna;plk1;rbx1;skp1
dre04218	Cellular senescence	0.817326	1.45249	0.012	42	ccna2;ccnb1;ccnb3;cdk1;ets1;kras;sqstm1;vdac1;vdac2
dre04068	FoxO signaling pathway	0.785659	1.38409	0.042	32	ccnb1;ccnb3;csnk1e;kras;plk1;plk3;prmt1;sod2

## Sheet: Sheet1
	C1	C2	C3	C4	C5
acsl5	0.240086	0.311239	0.832542	0.362525	0.254144
plin2	0.0782422	0.0365034	0.084323	0.0488798	4.77901
kras	0.107181	0.0778098	0.22209	0.0692464	0.270718
mapk1	0.0375134	0.0317003	0.0748219	0.0285132	0.135359
sqstm1	0.0878885	0.0268972	0.0522565	0.0325866	1.79834
pdia3	0.091104	0.0557157	0.143705	0.0488798	0.698895
dut	0.276527	0.243996	0.7981	0.305499	0.245856
