# Supplementary material for: Transcriptome Profiling of the Ovarian Cells at the Single-Cell Resolution in Adult Asian Seabass
Source: Front Cell Dev Biol. 2021 Mar 29;9:647892. doi: 10.3389/fcell.2021.647892 (PMC8039529; doi:10.3389/fcell.2021.647892)
Supplement: Supplementary file 8 [file Table_5.XLSX]

## Sheet: Sheet1
Table S5 Heatmap of the selected well-known marker genes of ovarian germ cell and somatic cell.
name	cluster 1	cluster 2	cluster 3	cluster 4	cluster 5
slbp	0.0900322	0.0720461	0.301663	0.105906	0.129834
dmc1	0.096463	0.0826129	0.286223	0.10998	0.10221
dnd1	0.0857449	0.0874159	0.25772	0.095723	0.0690608
nanos3	0.167203	0.157541	0.463183	0.177189	0.116022
kdsr	0.00535906	0.0067243	0.0225653	0.00203666	0.0220994
dmrt3	0.00643087	0.00480307	0.0249406	0.0101833	0.0165746
mre11	0.0096463	0.00480307	0.0106888	0.00814664	0.0138122
hspg2	0.00107181	0.00288184	0.00475059	0.00203666	0.00828729
fancd2	0.00321543	0.00192123	0.00593824	0	0.00276243
piwil2	0.00214362	0.00192123	0.0130641	0.00203666	0.00552486
rad50	0.0128617	0.0115274	0.0356295	0.0162933	0.00552486
msh2	0.0150054	0.00960615	0.0332542	0.0142566	0.0110497
dmrt2	0.0117899	0.0105668	0.0249406	0.0203666	0.00552486
gdnf	0.00857449	0.0163305	0.023753	0.0101833	0.00552486
hsd17b1	0.00192123	0.0546624	0.00118765	0	0
wt1	0.0675241	0.00384246	0.00593824	0.00407332	0.143646
sycp3	0.0589496	0.0710855	0.185273	0.0692464	0.0497238
ddx4	0.0696677	0.0566763	0.182898	0.0590631	0.0552486
gata6	0.110397	0.0441883	0.105701	0.0549898	0.0939227
gdf9	0.0439443	0.0403458	0.14133	0.0529532	0.0303867
figla	0.0471597	0.0518732	0.13658	0.0488798	0.0331492
dazl	0.0364416	0.0413064	0.103325	0.0346232	0.0414365
rad51	0.0182208	0.0288184	0.0712589	0.0224033	0.00828729
piwil1	0.0364416	0.0240154	0.0783848	0.0244399	0.0276243
ybx2	0.247588	0.244957	0.731591	0.293279	0.281768
zar1	0.50911	0.56292	1.59026	0.580448	0.439227
