# Supplementary material for: Transcriptome Profiling of the Ovarian Cells at the Single-Cell Resolution in Adult Asian Seabass
Source: Front Cell Dev Biol. 2021 Mar 29;9:647892. doi: 10.3389/fcell.2021.647892 (PMC8039529; doi:10.3389/fcell.2021.647892)
Supplement: Supplementary file 9 [file Table_6.XLSX]

## Sheet: Sheet1
Table S6 Cells enriched with dnajb1 gene and zar1 gene. Red colour represent 44 genes biased in granulosa (dnajb1+) cells, green colour represent 596 genes exclusively expressed in germ cells (zar1+), and blue colour represent 124 genes common in both two populations of cells.
CELLS	CGCTCAACGAAT	ATATGTGACCGA	CCACGTCGATGA	CTGTCCTCCGTG	TGTGCTTTCTTA	ATTTATCTGCAA	AGCTAAGTAGTG	CCCATCACCTTG	GCGCGCCGATAC	TTAGCTTACCCA	CTTATGCACGTT	CTGAAGAGGTTG	GACGGGAAATCT	GTAAGGATACGT	AACAGCGCTGAA	TATGCCCGAATC	AGTAGCATTGCG	GGGGGTTCACCC	AGGAGAACACAA	AGCGCTAGGGAG	CCCAAACATTCA	GATTCTTCTGGG	GTGCGGCAGAGG	CGAGAGTTATTG	AAGCAAGCTACA	TTTGGCGCCGAT	GGAATTATCGCT	GGCGTGACGCCA	TCAATGGGTATA	GGGGCACGCATC	TATACTGCATGC	GCCACTCCCCGT	CCCGCTAAGATC	CTTTCCTTTAAT	ACTTGTAGCGAC	CGTTCCAGCATA	AATCAATTCTAG	TTCAGCCGAGTC	CATTCTAGCTCC	GCGGGCCGTTAT	ACCCCTCAGGGA	CGGAACAGCGTG	CTTTAATTATGA	TTCTAAATTCAT	GCCCGTTGTGTA	ACGGCAGGCCTT	GGACCGCGAACG	TCGCGGCTTTAA	GAAGAAAGCAGG
CELLS	gra1	gra2	gra3	gra4	gra5	gra6	gra7	gra8	gra9	gra10	gra11	gra12	gra13	gra14	gra15	gra16	gra17	gra18	gra19	gra20	gra21	gra22	gra23	gra24	gra25	gra26	gra27	gra28	gra29	gra30	gra31	gra32	gra33	gra34	gra35	gra36	gra37	gra38	gra39	gra40	gra41	gra42	gra43	gra44	gra45	gra46	gra47	gra48	gra49
dnajb1	72	56	47	43	41	40	39	39	38	37	35	35	33	32	32	31	28	28	27	27	26	26	25	24	24	23	23	23	23	22	22	22	21	21	21	21	21	20	20	20	20	19	18	18	18	17	17	17	17
LOC108892211	5	12	8	24	17	16	11	24	13	21	12	7	12	6	9	10	14	1	23	5	10	3	1	11	10	9	9	7	2	1	9	11	4	18	0	5	2	11	2	6	2	10	0	7	23	3	10	11	0
LOC108892212	7	25	16	37	38	31	22	43	32	39	20	8	20	23	24	23	32	0	27	31	25	22	11	23	27	21	20	5	8	7	20	9	20	29	4	9	20	36	18	10	8	23	2	8	34	18	24	20	5
LOC108892190	1	14	2	13	14	17	8	19	20	18	11	4	7	7	11	9	15	2	9	15	10	11	10	14	12	10	8	7	5	2	5	3	8	13	1	5	2	18	4	3	3	8	1	2	10	9	8	10	3
LOC108898305	31	1	12	37	4	5	16	6	3	21	30	23	14	0	9	5	0	2	4	3	10	0	3	29	7	0	0	2	8	2	2	0	3	2	1	4	3	4	0	0	3	0	2	7	4	7	5	2	3
selenop	5	4	0	21	0	4	5	2	0	0	0	2	5	4	0	0	0	0	0	0	8	0	2	0	6	0	2	0	1	0	3	4	1	0	0	1	2	0	0	0	5	0	4	0	3	0	3	1	1
LOC108896796	153	51	40	9	53	33	69	11	62	9	8	13	41	7	14	73	7	15	92	19	21	28	7	34	1	7	0	4	2	34	6	8	0	31	14	0	7	7	6	21	3	39	33	1	15	29	18	23	11
LOC108888247	23	2	0	0	0	1	0	24	3	10	9	0	2	0	3	1	0	1	0	0	0	0	0	0	0	3	0	5	1	1	0	1	0	0	0	2	3	2	0	1	1	0	1	0	12	1	2	4	1
fosb	44	0	40	15	0	4	9	14	2	21	18	11	17	5	26	3	9	4	31	4	8	3	0	5	17	0	8	12	14	6	20	3	7	0	10	18	12	0	3	6	5	0	7	3	1	7	4	1	4
cunh8orf4	10	3	2	1	5	26	2	1	7	15	8	2	9	0	3	6	4	0	8	0	11	0	6	0	1	12	1	9	1	5	1	2	3	10	5	1	5	9	3	0	4	0	4	2	4	3	2	6	1
ahnak	9	1	2	13	2	0	2	0	6	8	4	2	1	0	3	3	0	0	1	0	0	0	0	8	0	0	0	5	0	0	2	0	5	1	1	2	0	1	0	0	1	0	0	0	0	4	0	4	0
LOC108897454	105	1	4	19	1	4	8	5	13	6	9	5	7	1	7	2	4	3	3	1	11	0	3	21	4	16	1	0	4	5	1	2	0	19	3	7	10	1	0	4	0	4	2	4	8	0	5	2	4
LOC108895611	10	0	6	9	7	37	5	3	0	4	9	6	0	7	14	3	16	0	27	7	25	3	3	10	11	0	4	9	2	2	18	1	3	4	4	0	10	13	0	0	0	0	4	4	1	12	18	2	2
LOC108896630	22	0	0	4	8	0	0	1	1	3	0	3	0	0	1	0	0	0	0	0	1	0	0	0	0	0	0	0	0	4	0	0	1	1	0	3	0	1	0	11	0	2	0	0	0	0	0	6	0
LOC108893370	32	0	8	4	5	3	4	9	6	1	5	3	6	0	5	3	1	2	0	1	0	0	3	0	0	3	2	2	0	7	7	0	3	0	5	3	0	1	0	1	2	1	3	5	5	0	0	2	2
plin2	22	17	0	17	14	14	16	24	29	20	3	24	8	7	0	3	1	2	4	1	1	0	6	1	15	3	6	6	8	1	7	0	7	0	5	9	22	4	7	7	14	7	8	10	5	7	8	1	0
LOC108899350	5	1	0	4	2	0	0	4	1	2	6	0	2	0	4	0	0	0	0	2	0	0	0	0	0	14	0	3	7	8	0	0	9	0	0	1	4	2	0	0	6	0	2	10	9	2	0	0	0
cd63	3	4	0	2	5	2	7	3	9	2	5	1	1	0	2	0	0	1	2	1	2	0	2	3	0	9	0	4	2	5	1	0	0	3	1	2	3	1	0	2	1	3	2	2	12	0	4	4	1
arrdc3	13	9	1	2	1	14	8	0	1	7	13	2	0	1	3	5	0	2	3	0	3	0	2	1	0	3	0	1	4	3	12	0	3	5	11	1	1	4	0	0	0	3	3	6	8	7	0	1	1
LOC108893420	29	7	6	10	10	3	9	10	6	11	6	1	3	1	4	16	0	5	3	1	7	0	0	9	1	1	1	2	0	0	0	0	9	5	4	2	0	0	2	3	5	5	4	0	2	0	0	7	6
LOC108898144	24	1	1	5	1	1	3	22	7	9	19	1	0	1	3	5	0	1	3	1	2	0	1	0	1	5	1	2	2	4	1	0	0	1	1	3	1	2	0	4	0	5	4	1	6	0	19	5	1
LOC108898190	169	10	10	16	3	8	22	1	42	44	63	3	29	1	11	2	0	0	0	0	9	0	10	23	0	10	0	20	3	15	1	0	0	48	2	23	6	3	0	0	13	0	9	3	18	8	1	12	2
LOC108897788	12	2	1	2	4	3	3	26	3	7	26	0	5	0	17	2	0	1	1	1	1	0	2	2	0	5	0	2	5	9	0	1	7	1	0	2	5	0	0	0	5	0	6	4	15	1	0	4	0
LOC108875304	29	1	2	1	4	2	1	50	5	14	33	2	0	0	15	3	0	2	3	0	0	1	4	1	0	1	5	0	13	19	0	0	11	16	3	1	0	9	0	0	2	3	8	1	14	1	3	1	8
sqstm1	14	6	2	5	2	1	6	3	14	3	3	5	5	0	0	9	1	0	0	2	0	0	1	0	1	0	0	0	2	0	0	0	0	2	0	1	2	2	0	2	0	5	0	3	1	0	7	3	4
LOC108897073	7	1	20	1	5	12	0	0	7	14	7	4	1	0	8	1	0	3	13	18	10	0	1	1	0	3	0	8	0	5	2	0	1	0	3	4	1	1	0	2	5	4	13	3	2	0	2	4	2
LOC108889698	3	1	4	4	6	1	5	23	34	15	14	0	3	1	9	2	1	0	5	0	2	0	1	2	0	25	0	7	1	15	0	0	7	6	1	9	14	3	0	7	2	3	0	4	44	1	18	7	0
ddit3	18	1	2	9	3	7	8	8	12	10	6	6	3	5	4	2	2	0	1	5	2	0	8	11	1	1	1	2	4	1	3	1	2	0	0	0	4	6	4	0	2	1	0	3	5	2	2	4	0
atf3	1	0	0	7	2	4	5	0	3	9	0	0	0	0	0	2	0	1	10	5	8	0	1	0	0	0	0	1	0	0	13	0	0	4	4	4	0	1	0	2	0	5	0	0	0	0	14	1	1
LOC108889751	23	1	9	2	0	0	3	2	0	0	4	2	0	0	3	5	0	3	1	2	6	0	2	1	0	3	0	0	2	2	8	0	2	0	4	2	0	1	0	0	1	0	1	0	3	1	2	1	5
LOC108895929	1	1	2	11	0	5	3	2	0	12	14	0	5	2	3	4	2	0	4	4	1	0	6	4	0	2	3	7	3	4	1	2	3	0	0	3	0	0	1	3	3	2	2	0	1	0	3	4	0
hspa5	58	0	3	0	4	3	4	20	9	0	0	0	1	0	2	9	0	6	3	0	1	1	0	1	0	1	0	4	0	0	2	1	0	2	1	0	3	0	4	0	0	0	0	0	0	5	1	6	0
hspb8	10	0	18	1	4	0	5	0	4	19	9	7	0	0	0	3	0	3	4	3	0	1	1	0	5	8	5	0	0	7	0	0	7	2	7	0	3	0	1	0	3	0	0	0	9	6	1	0	3
zfand5	11	3	7	12	5	7	7	5	7	8	7	5	4	4	0	6	0	6	7	8	5	1	3	0	1	0	2	2	2	0	6	6	5	5	0	5	1	3	0	0	6	0	2	2	3	1	11	2	2
LOC108892885	39	8	2	17	2	3	4	13	1	9	4	1	1	0	3	1	0	0	1	2	5	0	0	9	0	2	2	5	0	4	1	0	2	8	5	1	3	8	0	0	0	0	0	2	0	2	5	13	2
LOC108873580	79	1	2	5	1	0	10	3	1	3	5	2	1	2	3	5	1	8	5	0	3	5	0	2	3	3	5	2	3	7	12	1	3	9	4	2	6	1	0	1	4	1	3	1	3	3	4	11	6
ctsl	12	1	0	1	9	2	0	5	2	0	1	1	1	0	1	4	0	4	1	1	0	0	1	1	0	2	0	0	1	3	1	0	8	0	0	0	0	2	0	0	0	1	3	2	2	0	4	5	0
LOC108895835	7	1	8	3	1	0	0	0	0	2	3	14	1	1	1	3	2	0	1	0	12	1	1	2	0	6	0	0	2	1	8	0	1	3	0	1	3	1	0	2	1	0	3	11	11	1	0	0	1
LOC108891774	5	1	3	12	0	10	0	0	2	0	0	0	0	0	0	1	0	1	5	6	16	0	1	2	0	0	0	0	0	0	6	0	0	3	9	0	0	1	0	0	0	0	0	0	0	0	0	1	7
LOC108874625	7	0	1	0	3	5	0	1	8	4	0	0	7	0	0	7	0	2	2	1	1	0	1	0	2	1	2	0	1	2	2	0	3	2	0	3	2	5	1	0	1	2	0	1	0	0	0	15	4
LOC108889716	176	3	8	10	0	10	10	17	9	7	7	7	2	2	15	55	0	30	3	0	18	3	1	2	2	18	1	9	2	12	42	1	3	7	12	6	9	4	3	0	7	1	7	2	18	5	48	14	13
LOC108896590	16	0	1	0	5	6	2	5	7	5	11	3	1	0	6	5	0	0	8	1	4	0	0	1	4	0	3	5	0	13	1	0	0	0	3	1	2	3	0	0	1	0	3	8	2	2	3	6	2
LOC108903018	3	7	1	5	2	4	0	3	3	3	3	2	9	0	2	2	5	0	3	0	0	1	1	2	0	2	0	0	3	1	0	4	3	1	0	1	2	0	0	0	1	0	5	1	8	1	1	1	0
LOC108898187	4	0	0	0	0	0	1	0	0	2	14	0	0	0	6	3	0	0	0	0	0	2	1	0	0	16	0	0	9	1	0	0	3	2	1	0	0	4	0	0	5	1	0	1	4	2	0	0	0
ubb	10	11	6	21	15	17	11	14	61	25	9	28	33	13	9	11	9	0	6	19	13	8	4	11	39	9	10	15	19	8	13	4	21	5	6	8	13	11	16	3	9	4	4	14	13	13	12	1	4
LOC108887430	46	8	3	9	4	3	6	70	18	19	28	7	10	2	16	31	0	7	8	4	4	1	3	17	3	20	0	6	4	8	4	2	8	12	4	13	20	13	0	3	11	2	4	11	17	3	5	12	3
LOC108898591	77	25	10	6	9	6	4	9	15	8	15	4	3	0	9	88	3	32	9	10	9	1	14	11	1	9	0	9	3	9	9	0	4	6	21	16	7	7	0	11	16	18	19	6	10	13	29	21	9
LOC108888880	42	10	6	18	2	7	5	7	37	15	13	7	6	0	10	3	0	0	0	4	6	0	5	5	0	9	0	2	4	8	0	0	3	5	0	1	1	1	0	0	2	0	0	4	14	2	1	6	1
LOC108887888	35	2	1	3	1	1	2	6	10	1	4	1	0	1	0	38	2	21	2	0	2	0	2	2	1	3	1	2	6	1	72	1	1	1	28	6	1	2	1	0	0	3	5	0	2	1	10	1	12
LOC108888851	82	2	1	10	0	6	11	8	8	13	13	7	0	0	11	24	1	13	11	0	12	1	1	6	1	9	1	6	3	4	31	0	2	4	12	4	6	3	2	0	0	0	5	1	9	4	38	7	8
rpl28	43	0	2	2	2	4	7	7	4	4	2	1	2	4	0	17	1	3	1	7	7	1	1	0	9	1	4	2	4	2	5	23	4	8	1	6	1	3	1	1	5	2	3	6	3	1	2	6	7
rpl37a	44	2	4	8	0	9	6	8	4	4	5	2	2	3	3	8	0	4	1	10	9	2	0	2	4	0	7	4	16	1	3	35	8	10	1	3	3	5	2	1	4	0	2	7	3	0	2	9	1
metap2	21	0	5	1	0	0	1	0	4	1	0	0	0	0	1	8	1	5	6	1	5	0	0	0	0	4	0	1	1	5	7	0	0	0	0	1	0	0	2	0	0	0	0	2	1	0	16	0	0
nsa2	20	2	0	2	0	0	1	0	2	3	4	5	0	0	0	4	0	0	4	0	3	0	0	2	0	1	0	0	1	1	9	0	2	4	2	0	1	2	0	0	1	2	2	0	3	0	19	0	1
rpl29	44	1	1	5	3	2	3	7	3	1	2	5	0	2	2	11	0	7	0	3	5	0	1	1	0	0	7	2	7	3	6	18	4	4	3	1	3	3	1	1	2	1	4	6	1	0	1	6	0
rpl14	79	2	3	5	1	2	4	3	6	5	2	4	1	8	3	16	1	14	0	5	16	0	3	1	6	1	2	4	12	1	2	10	5	18	1	12	8	3	0	1	4	3	0	5	2	3	5	4	5
rps28	53	4	3	2	1	3	6	2	1	6	3	3	0	1	0	11	1	8	0	10	12	0	0	0	2	0	2	0	8	1	7	16	3	7	4	4	1	6	0	0	0	2	2	6	1	1	1	9	2
ddx21	32	1	4	4	0	0	1	0	4	2	1	0	1	0	0	3	0	0	1	0	3	0	1	0	0	0	0	0	2	3	8	0	0	0	2	1	1	0	0	0	0	1	1	0	0	0	2	0	1
rpl23a	10	3	1	4	1	9	3	6	5	3	1	6	1	0	1	16	0	2	0	19	5	0	0	4	2	1	2	3	7	2	1	22	1	4	4	12	4	1	1	0	1	0	2	4	1	6	2	7	4
rps21	57	3	3	0	0	4	5	5	5	6	3	9	0	2	0	16	0	7	0	12	4	0	0	2	4	1	0	2	4	0	0	13	1	6	1	5	2	2	1	0	3	0	1	5	0	4	4	4	5
rps16	36	2	4	12	1	6	4	9	5	7	5	5	4	7	0	21	0	10	0	21	12	0	1	1	7	0	3	3	16	1	8	14	4	12	3	8	2	7	0	0	3	2	6	7	4	2	6	9	7
rps23	44	6	6	11	2	9	7	9	11	2	2	8	1	6	4	34	2	8	1	17	10	1	1	2	3	2	1	1	8	2	6	21	6	13	3	11	2	4	0	1	7	2	5	10	4	1	2	13	13
rps26	57	3	8	7	2	2	7	7	8	4	3	10	0	4	2	28	1	7	0	16	7	0	0	0	4	1	4	2	9	0	3	12	5	13	3	6	3	6	0	0	7	0	2	1	2	1	2	10	9
rps12	186	1	5	9	1	2	6	12	7	15	9	10	2	9	1	52	0	23	0	11	16	2	1	1	4	2	6	1	11	1	14	33	3	13	2	2	0	6	1	0	10	0	7	8	2	4	6	10	29
LOC108872753	31	1	1	4	1	3	2	7	1	3	5	1	2	0	4	15	0	6	10	0	0	8	0	3	2	2	4	1	4	0	22	0	6	6	0	2	8	0	3	1	6	0	2	0	3	4	0	23	8
LOC108894165	4	19	0	18	1	3	16	3	9	1	0	0	0	1	1	3	1	1	0	0	0	0	1	12	0	2	1	0	0	0	0	1	2	2	0	2	0	0	1	1	0	1	0	0	1	0	1	1	0
btf3	4	1	0	3	0	2	0	1	4	3	2	0	0	0	2	2	0	0	5	0	4	0	0	0	1	2	0	0	1	4	5	0	1	0	2	1	1	1	0	0	0	2	0	0	1	2	8	2	0
rps27a	80	1	1	7	1	4	9	11	4	3	3	6	1	1	0	24	1	17	0	7	17	0	2	0	5	1	1	4	8	2	7	17	10	10	4	7	6	6	0	0	5	1	3	5	4	4	3	5	6
rps29	55	3	2	2	2	6	4	7	1	5	0	5	3	3	0	8	1	4	0	3	9	1	3	0	2	3	1	0	6	0	4	11	4	7	0	4	3	6	3	0	1	1	0	6	2	0	3	5	4
LOC108874907	15	2	5	4	2	2	2	1	1	6	17	0	2	0	8	1	0	2	1	0	0	2	2	0	4	3	4	2	1	2	2	1	0	7	7	1	1	0	2	3	2	0	0	4	6	3	0	2	1
rpsa	90	2	4	7	2	3	8	4	10	5	3	6	1	11	0	41	1	13	0	9	12	0	1	0	4	3	5	2	13	1	9	19	5	12	0	9	4	8	0	1	5	0	3	6	3	5	3	10	10
LOC108893657	25	5	4	10	3	4	5	6	4	3	4	2	0	0	4	16	0	4	8	0	6	0	2	3	0	7	3	2	0	1	12	3	3	3	8	6	5	5	0	0	5	0	3	2	3	1	47	7	1
cct3	9	1	0	2	1	0	1	1	10	3	0	0	0	1	4	4	0	0	2	1	3	0	1	1	0	3	1	0	1	0	1	0	0	0	1	0	0	3	0	4	0	1	2	0	2	0	8	1	1
LOC108895376	72	1	6	10	0	6	3	14	9	4	4	4	2	2	6	22	0	13	10	0	9	0	1	4	3	9	0	5	2	5	23	2	6	5	12	7	3	3	0	1	2	1	3	1	5	3	26	10	2
btg1	15	1	0	5	2	3	0	7	2	6	16	2	5	1	6	4	0	0	2	2	3	1	3	0	0	6	0	3	1	4	9	1	1	3	0	2	6	1	0	1	8	0	3	1	4	2	1	5	3
LOC108893594	2	2	0	3	0	1	2	4	2	1	0	1	0	0	1	8	0	0	14	1	1	1	0	2	0	0	0	0	0	1	1	0	0	1	2	0	0	0	1	0	1	0	0	0	1	0	76	1	0
rpl37	31	4	3	7	1	5	4	6	4	3	2	3	2	4	0	26	1	3	2	7	14	1	0	1	5	3	5	3	6	1	3	20	2	7	1	6	5	4	0	1	3	3	3	5	7	0	3	6	6
rpl18	51	2	3	2	0	7	2	8	3	7	6	1	0	4	0	16	0	11	0	6	13	1	2	0	2	1	1	2	5	1	2	5	4	5	1	7	3	2	1	0	1	0	0	4	1	5	5	3	2
rps24	122	3	5	12	2	7	6	6	6	6	2	5	3	4	1	27	1	16	0	10	17	0	2	0	1	1	5	2	15	2	3	22	2	7	6	3	3	2	0	0	5	2	2	7	1	4	3	3	11
rplp1	65	2	3	4	0	8	3	11	1	6	0	1	1	3	1	21	2	6	0	7	8	1	6	0	4	2	3	1	7	1	7	28	2	7	1	6	6	4	2	0	4	1	3	9	0	2	3	21	4
rpl35a	60	3	4	7	1	8	8	5	4	3	2	5	3	4	3	34	2	13	0	11	15	0	1	0	6	1	1	5	8	1	10	32	5	7	2	6	3	6	0	1	5	0	8	6	5	3	3	9	10
rpl23	6	2	1	4	1	2	7	6	2	3	2	7	1	4	2	8	0	0	0	5	2	0	1	5	1	1	1	1	5	2	3	13	9	4	3	7	3	5	0	0	2	3	3	6	2	2	5	1	2
psap	5	1	2	1	1	0	4	2	5	2	1	3	0	1	0	0	0	1	1	2	0	0	1	0	3	0	1	0	1	0	1	2	0	1	1	4	1	0	0	0	0	0	1	1	0	0	0	1	1
rps15	53	3	2	7	0	5	1	11	5	5	1	6	3	6	2	16	2	1	0	11	9	1	0	0	4	0	2	3	10	0	5	20	7	8	0	5	4	2	0	0	2	0	5	7	1	0	2	5	3
rpl38	33	1	3	8	5	2	3	5	1	2	0	4	0	3	2	17	3	3	0	6	2	1	1	1	0	0	1	1	3	0	4	13	1	6	2	3	3	4	0	0	1	1	1	3	4	1	1	7	6
rps20	61	3	4	7	3	3	6	11	9	11	3	17	5	6	2	20	3	14	2	6	16	1	1	2	4	1	8	4	12	1	6	35	12	5	6	8	5	9	1	1	11	0	5	8	3	0	5	10	3
rpl27a	44	3	4	10	1	4	5	7	6	3	2	4	2	4	0	17	0	6	0	3	17	2	3	1	6	1	6	3	5	1	6	15	8	8	3	4	0	5	0	1	4	2	4	8	1	0	8	6	1
hsp90ab1	122	16	5	26	1	14	18	10	26	22	20	13	14	2	23	55	11	13	38	4	4	10	0	5	17	5	11	10	8	4	29	0	2	6	4	12	9	0	8	1	7	12	12	1	5	10	4	51	5
LOC108886907	17	1	1	1	0	0	2	3	0	1	3	1	0	0	1	9	0	0	3	0	4	1	0	0	0	2	0	1	3	2	12	0	0	0	2	2	6	1	0	0	2	0	0	0	4	1	5	1	2
rpl6	56	2	4	3	1	8	6	4	6	7	3	1	0	4	1	16	0	5	1	11	11	1	3	1	5	0	2	0	5	0	2	19	4	6	2	3	7	5	2	0	3	2	8	6	5	2	0	4	6
rpl30	27	3	4	3	0	6	3	6	3	4	4	6	1	7	0	9	0	2	0	10	8	0	1	1	3	3	4	1	12	1	3	15	5	6	3	6	3	2	0	0	7	0	1	1	2	0	2	4	5
rps10	39	5	2	6	0	2	5	6	2	4	3	4	2	2	1	11	1	6	1	6	12	1	0	0	4	0	3	2	10	1	5	18	5	8	1	5	4	4	1	3	7	0	1	4	1	3	5	6	7
bsg	10	0	0	0	0	1	0	8	4	5	3	0	0	0	0	3	0	1	4	0	0	0	0	0	3	4	1	1	2	2	0	0	0	0	0	1	2	0	0	0	0	1	0	0	8	0	5	1	0
rps9	61	3	3	3	1	5	5	6	3	10	1	6	0	5	0	15	0	8	0	6	7	0	1	0	1	0	4	2	7	4	2	13	5	8	1	2	1	1	1	1	5	1	6	2	2	1	5	7	6
rps18	38	2	3	13	1	8	5	6	7	5	2	17	2	1	2	22	0	4	0	14	5	0	0	0	1	0	3	1	10	3	8	20	7	7	0	12	3	0	1	0	5	2	5	8	1	3	6	14	5
rack1	60	4	3	6	2	0	1	11	4	5	2	6	1	2	2	22	1	5	1	4	4	1	1	2	2	0	2	2	12	3	0	6	3	6	3	3	4	1	1	1	5	0	2	5	1	3	0	3	12
rpl31	52	3	1	2	1	2	5	6	5	5	1	1	1	4	0	17	0	8	0	13	6	0	0	2	1	1	2	1	6	1	4	25	9	9	6	5	3	5	0	0	4	1	2	8	1	0	4	6	13
rpl34	24	3	1	5	1	4	8	11	3	5	1	7	3	2	0	15	1	4	0	6	7	0	0	1	7	0	2	0	12	1	6	17	6	5	3	10	7	3	2	0	0	1	1	10	0	1	6	7	5
rps5	25	3	0	4	0	4	14	5	1	9	0	3	1	2	1	16	0	7	1	9	4	2	0	2	5	3	2	2	8	3	3	20	3	12	1	2	6	4	1	1	3	1	3	4	3	2	6	6	4
rps14	35	2	2	5	0	3	4	5	2	4	3	4	2	8	1	12	0	4	0	6	4	2	2	0	4	1	3	2	4	2	2	14	2	5	4	2	1	5	1	0	3	0	2	4	1	1	0	4	5
rpl32	40	3	2	7	0	8	4	4	2	1	0	5	1	1	1	13	4	9	0	7	10	0	2	0	4	1	5	3	5	1	6	25	3	12	1	5	5	5	1	0	1	2	0	2	0	1	1	5	2
rpl5	71	5	5	9	2	3	4	6	6	4	0	8	1	5	2	26	1	10	2	8	18	2	1	2	7	2	1	6	13	1	8	29	4	13	4	15	2	5	1	0	6	2	4	3	5	8	4	6	7
LOC108898398	40	3	4	4	0	3	0	5	3	6	7	1	1	2	1	21	2	6	6	0	3	1	0	1	0	7	0	3	0	3	24	0	5	1	5	8	1	7	1	0	4	1	1	2	6	1	36	1	2
rps15a	54	2	6	7	0	1	1	11	4	6	1	4	2	1	3	14	1	10	0	11	11	1	2	1	4	0	2	1	6	1	2	19	11	8	5	8	3	3	1	0	2	3	3	7	5	4	1	6	8
LOC108887838	3	2	1	3	1	0	0	3	2	2	5	2	0	2	3	4	0	3	3	0	3	0	1	2	0	1	1	0	1	2	13	0	1	1	0	1	4	3	1	1	0	1	1	0	4	0	16	2	1
LOC108893338	55	3	1	1	2	3	3	3	22	3	3	4	1	0	0	6	1	9	3	0	2	0	0	1	3	1	1	0	4	1	2	0	1	2	2	6	2	8	2	3	0	3	4	1	8	4	13	1	2
rpl13	44	2	4	0	2	7	3	5	2	1	5	1	0	6	1	12	0	9	1	9	6	0	0	0	6	0	2	0	5	0	5	7	5	10	4	2	4	4	0	1	5	0	0	1	1	2	4	7	5
rps4x	43	4	2	10	0	5	5	1	8	2	1	8	0	7	2	7	1	2	0	12	10	1	0	1	2	1	7	3	11	2	3	23	3	4	1	6	2	1	0	0	3	0	1	7	1	0	6	5	4
rpl17	62	2	0	8	0	9	6	10	2	5	7	4	2	7	4	14	0	6	1	14	15	1	1	3	2	1	5	4	11	1	7	27	12	8	1	10	6	4	0	1	6	1	2	5	3	5	6	16	2
rpl21	29	5	4	11	4	10	8	14	4	7	4	7	3	12	0	11	1	4	0	10	6	1	1	1	4	1	4	1	4	4	2	17	5	9	3	5	3	6	0	0	4	1	7	6	7	3	6	12	5
rpl24	34	1	2	5	1	3	2	1	2	6	2	7	1	3	0	12	2	0	0	3	6	3	0	0	1	1	0	3	6	1	4	6	5	4	2	2	4	4	0	0	2	3	0	6	2	3	5	9	2
vdac1	1	1	0	3	0	1	0	6	0	2	1	0	0	3	0	4	0	1	0	0	0	0	1	0	0	0	3	1	2	0	0	0	0	0	0	2	0	1	0	3	0	1	4	3	0	0	0	0	0
rps2	75	8	1	11	1	5	10	4	2	8	4	7	0	6	0	17	0	13	0	11	16	1	4	1	6	1	5	3	14	1	4	18	5	5	1	1	0	6	0	0	13	2	1	10	4	3	6	11	5
rpl27	37	4	2	12	2	12	8	10	1	2	5	8	5	3	2	26	3	2	0	13	15	4	1	1	5	3	6	3	13	1	6	25	3	8	3	5	6	12	1	0	3	1	5	8	7	3	2	9	4
LOC108900468	21	0	1	2	2	3	0	4	1	1	3	0	1	0	0	6	1	1	3	0	2	1	1	0	0	2	0	0	0	1	6	1	1	0	2	1	0	1	0	0	0	1	2	2	2	0	11	2	2
rpl13a	44	1	1	5	5	4	5	9	4	3	0	6	1	7	0	14	0	8	0	13	7	1	1	2	4	1	3	6	6	1	2	9	4	9	1	9	3	1	2	1	3	1	1	3	1	2	4	4	3
eif3j	23	0	5	3	2	1	0	1	4	1	1	2	0	0	0	7	0	4	4	0	0	1	0	0	0	0	0	0	0	1	1	0	0	3	1	4	2	0	0	0	3	2	0	0	0	0	0	13	0
pabpc1	35	1	0	3	0	0	1	2	4	0	0	0	0	0	2	9	0	4	9	0	4	0	0	1	0	4	0	1	0	0	0	0	0	2	0	1	1	0	0	0	1	0	4	0	0	0	13	0	1
rtn3	9	0	1	0	0	0	1	4	3	0	0	1	0	1	0	0	0	0	0	4	2	0	0	0	0	0	0	2	0	0	0	1	0	1	0	0	1	4	0	0	0	0	0	4	0	1	0	0	2
LOC108898915	92	8	6	16	5	11	8	17	23	14	13	6	2	1	5	21	2	8	11	1	27	3	0	8	2	9	2	9	2	7	20	5	0	6	6	8	7	6	2	2	5	4	3	5	8	3	15	12	16
rpl22l1	22	1	0	0	4	0	0	4	2	0	1	0	0	0	0	9	1	1	0	3	0	0	0	0	0	0	0	0	2	2	0	4	4	1	1	1	1	1	0	0	0	0	0	2	3	1	1	0	4
LOC108889268	5	1	3	4	2	1	0	0	2	0	0	1	2	1	1	1	0	1	3	0	0	0	0	1	0	2	0	0	0	0	1	0	1	1	0	0	0	4	0	0	0	0	0	0	2	0	0	1	0
rpl9	28	1	2	5	0	4	4	6	4	4	2	6	1	6	0	10	0	4	0	11	7	0	2	1	1	2	5	0	9	1	7	16	10	5	0	7	3	3	0	1	5	1	2	11	3	0	3	13	3
rps7	5	1	0	4	1	3	0	6	1	2	1	4	0	3	0	10	0	1	0	4	2	1	0	0	0	2	1	3	4	1	2	10	1	3	3	2	1	2	0	0	2	0	0	1	1	0	3	4	4
rpl7a	34	8	1	8	0	9	2	11	2	5	5	6	0	4	2	19	1	9	1	6	12	1	0	1	5	0	3	1	13	1	4	25	5	8	3	12	1	5	1	0	6	0	3	8	0	4	2	4	1
rpl11	45	2	6	13	0	5	2	10	3	1	3	8	1	0	0	21	0	5	0	15	10	1	1	0	1	0	3	0	12	1	3	17	6	5	3	2	1	2	3	0	4	1	4	6	2	0	3	9	4
LOC108902662	0	0	0	0	0	0	0	26	0	1	0	0	0	0	0	0	0	0	0	0	0	1	0	0	0	1	1	0	4	1	0	0	0	0	0	0	0	2	0	0	0	0	0	0	0	0	2	1	0
LOC108877649	4	3	1	2	0	1	0	1	3	1	1	2	1	1	0	2	1	1	0	2	0	0	0	0	1	0	0	1	0	0	0	1	1	0	0	1	0	0	0	0	1	0	0	3	0	1	0	0	0
gabarap	5	2	0	0	1	0	1	1	6	2	0	0	1	0	0	2	0	2	5	0	0	0	0	0	1	0	2	0	0	0	0	0	0	1	2	2	1	0	0	0	0	1	0	0	6	0	1	7	2
rps13	22	4	3	7	1	3	4	3	3	1	2	7	2	5	0	14	0	7	0	11	11	2	0	1	6	0	0	0	7	1	8	18	4	4	3	5	2	3	2	0	6	2	2	4	0	4	1	10	3
LOC108895690	13	2	0	1	0	1	2	0	1	0	1	1	0	0	0	4	1	3	5	0	0	0	0	1	0	0	0	0	0	0	0	0	0	0	3	0	0	1	0	0	0	0	0	0	1	0	11	0	1
ankrd12	3	1	2	2	2	0	0	0	7	2	0	2	0	1	1	3	0	1	2	2	0	1	0	1	0	2	0	0	0	0	3	2	2	1	1	2	0	0	0	0	0	0	0	0	0	4	3	0	0
naca	9	3	1	6	1	2	2	1	7	2	4	3	0	1	3	12	1	3	4	0	5	2	1	3	0	2	0	0	2	3	16	0	0	4	6	6	3	0	0	0	2	1	1	0	2	2	14	3	0
rsl24d1	2	0	0	0	0	1	0	1	1	1	0	3	0	1	0	2	1	2	0	14	0	0	0	0	0	0	0	0	2	1	1	4	0	0	1	1	2	0	1	0	0	0	0	0	1	0	0	1	1
LOC108897677	1	2	1	1	0	0	1	5	3	0	0	1	0	0	1	2	0	0	5	0	0	0	0	1	1	0	0	0	0	1	0	0	0	1	0	1	0	1	0	0	0	0	0	0	1	0	16	1	0
csde1	24	3	0	8	0	2	3	2	5	2	1	0	1	0	0	6	1	2	4	0	2	2	2	6	2	3	0	1	0	1	1	0	1	0	0	1	0	1	1	0	0	0	2	2	1	0	14	1	3
eif2s1	3	3	2	3	1	2	1	0	0	0	0	1	0	0	0	7	0	1	2	0	0	5	0	0	1	0	0	0	0	0	0	1	1	0	1	0	0	0	2	0	0	0	0	1	0	0	1	15	0
rplp0	64	0	2	6	1	1	4	13	1	7	4	10	1	5	1	18	0	1	2	5	7	0	5	0	2	0	2	2	13	3	6	25	6	4	2	6	1	2	0	0	2	2	5	3	0	2	4	11	5
rpl8	38	4	0	7	0	8	4	4	4	8	3	5	0	6	0	10	2	4	0	5	11	1	2	0	1	1	2	1	8	2	7	18	2	7	1	4	9	1	1	0	5	0	4	5	3	4	1	5	0
rpl35	32	5	4	9	4	6	4	3	6	6	2	6	6	8	0	13	1	5	1	10	8	2	0	5	3	1	8	2	12	0	11	23	10	3	3	9	4	10	1	0	9	0	7	9	6	3	8	3	4
eif2s2	26	3	0	7	0	1	2	4	7	1	4	0	0	0	0	8	0	5	8	1	0	0	0	0	0	1	0	0	0	1	2	1	1	1	0	1	4	0	1	2	0	2	1	0	0	6	1	17	1
LOC108901470	2	0	0	1	0	0	1	5	1	0	5	0	0	0	1	2	0	2	6	0	0	0	0	0	0	0	0	0	0	2	0	0	0	1	1	1	1	2	0	0	0	2	1	0	2	0	35	0	0
sf3b6	2	0	1	1	1	1	1	0	0	0	0	1	0	0	1	1	0	0	0	11	0	0	0	0	0	1	0	0	0	0	0	1	0	0	1	0	0	1	0	0	0	0	0	0	0	1	1	0	0
rpl18a	18	3	2	3	1	4	6	7	7	5	3	8	1	4	6	20	1	3	0	14	0	0	0	2	1	3	1	3	7	1	1	11	6	5	4	4	3	2	2	1	4	1	5	6	0	3	3	9	5
ywhaq	15	2	0	2	2	0	1	2	1	3	1	1	0	2	0	5	1	3	0	5	0	0	0	0	3	0	0	1	4	2	2	1	1	1	0	5	0	5	0	0	0	0	2	5	1	0	0	1	1
rps6	44	6	3	5	0	1	5	9	5	6	2	6	1	2	2	14	2	7	2	10	10	0	1	0	3	1	3	2	11	1	3	15	7	5	3	8	7	4	2	0	3	0	4	9	2	2	3	12	7
rpl7	70	5	2	7	1	4	2	7	8	7	5	5	1	2	1	20	0	9	0	13	9	0	1	0	2	0	5	3	8	0	1	19	2	9	3	9	6	2	0	0	6	4	8	7	0	4	4	8	8
eef1g	84	2	1	3	1	3	4	6	0	2	1	6	1	2	1	19	0	4	4	1	2	14	2	4	5	1	10	0	2	2	10	2	1	1	1	2	7	0	1	2	1	1	3	1	3	8	1	12	3
rpl4	31	2	3	4	2	4	3	5	3	3	3	11	0	4	0	13	1	4	0	9	9	2	0	1	3	0	1	2	15	1	3	14	9	7	1	11	2	3	1	0	4	3	3	4	0	4	3	6	2
LOC108894289	18	1	1	4	0	1	2	1	0	3	0	2	1	0	1	8	0	0	9	1	4	1	0	6	1	4	0	1	0	1	14	1	0	2	0	2	2	1	0	0	0	1	1	0	1	0	16	6	0
LOC108888623	36	2	4	16	1	4	6	13	2	3	8	1	1	0	3	22	2	4	12	1	5	0	1	3	1	4	3	4	1	9	14	0	2	2	5	6	3	4	0	0	2	1	2	3	11	0	23	2	7
rpl15	33	1	2	3	1	5	4	9	6	5	4	5	3	5	2	6	4	3	0	9	10	1	0	1	2	1	4	2	9	3	4	14	4	6	3	5	2	2	1	0	7	3	3	10	1	2	2	7	1
rps8	61	1	2	7	1	3	8	12	4	6	6	5	3	5	3	18	3	7	0	5	11	0	2	0	4	0	1	2	9	4	7	21	2	4	7	10	3	3	1	1	5	1	10	9	3	2	3	10	9
LOC108888746	31	3	2	1	0	6	2	2	0	1	5	0	1	0	1	7	0	5	7	0	0	2	0	3	0	5	0	1	2	4	9	0	0	2	2	0	2	1	1	0	3	0	2	1	3	0	16	1	5
rps25	41	5	1	10	0	7	6	14	6	7	5	5	1	5	0	20	3	5	1	12	6	0	3	2	5	1	4	3	9	0	3	21	5	8	6	5	3	7	0	0	3	1	1	1	3	3	2	7	5
LOC108880747	0	0	0	0	0	0	0	0	1	0	18	0	1	0	0	1	0	0	0	0	0	0	0	0	0	0	0	0	0	0	0	0	0	0	0	0	0	0	0	0	0	0	0	0	0	0	0	0	0
rpl10a	31	2	1	3	0	5	1	3	6	4	0	5	0	5	0	12	2	3	2	12	7	1	0	0	2	2	2	0	7	3	1	8	5	3	1	1	5	1	2	0	6	2	5	2	0	5	2	2	4
LOC108876377	41	4	5	12	2	5	12	7	8	5	8	4	2	1	8	18	2	2	12	1	0	11	1	1	3	0	9	2	4	11	15	4	2	5	2	5	3	2	8	1	4	0	5	0	6	3	7	23	5
tmed10	3	1	0	0	0	0	0	3	1	1	0	0	1	0	0	0	0	0	0	1	1	0	0	0	2	0	0	0	1	0	0	1	0	1	0	0	0	0	1	2	0	2	4	0	0	1	0	0	0
rps11	40	6	1	4	0	3	6	3	4	3	6	3	0	5	1	24	1	10	1	10	10	0	1	1	5	2	1	1	9	3	2	17	5	8	9	3	2	2	0	0	2	1	3	4	4	2	3	14	7
LOC108882925	0	3	0	5	0	0	0	3	0	0	1	0	0	0	0	1	1	1	0	0	0	0	2	0	0	0	0	0	0	0	0	1	0	0	0	3	0	1	0	0	0	0	0	0	0	0	1	0	1
LOC108892037	4	1	0	0	0	1	2	2	1	2	0	1	2	0	0	5	0	0	4	0	0	0	0	1	1	0	0	1	0	2	1	0	0	0	1	3	0	0	0	0	0	1	1	0	2	0	9	1	0
rgs14	11	1	0	1	2	0	1	6	0	2	0	2	1	3	0	0	0	0	0	1	0	0	0	0	1	0	1	0	2	0	0	0	3	0	1	1	0	1	0	0	1	0	1	1	5	0	0	0	0
abcf1	7	1	0	1	0	1	0	2	0	0	2	0	0	0	0	3	0	0	3	0	1	0	0	0	0	0	0	0	0	0	1	0	0	0	3	0	2	0	0	0	0	0	1	0	0	0	16	0	4
LOC108893688	35	5	2	4	2	7	4	5	6	5	8	2	3	1	2	5	0	3	5	0	7	2	2	4	0	8	3	4	0	7	14	2	0	0	4	1	1	4	0	0	0	1	3	0	16	2	23	8	9
capza2	4	3	0	2	0	1	1	8	5	0	0	0	0	2	0	2	1	0	3	2	0	1	0	0	1	1	0	0	2	0	0	0	0	3	0	0	0	1	1	0	0	0	0	0	0	0	8	1	0
rtf1	1	3	1	0	0	0	0	4	0	0	0	1	0	0	0	3	0	1	0	2	0	0	0	0	0	0	0	0	1	0	0	0	0	0	0	0	1	0	0	0	0	0	0	0	0	0	1	0	0
rps3a	31	6	2	2	1	6	3	8	5	3	0	6	1	5	1	13	3	9	1	7	9	1	1	0	3	2	2	2	6	1	1	15	3	10	1	2	5	2	1	1	7	0	1	8	0	1	2	4	6
actb	130	22	10	56	10	19	24	128	19	24	33	2	8	5	23	49	9	13	23	8	20	9	19	12	6	8	6	14	1	20	5	5	13	19	8	16	13	36	6	9	9	2	11	7	24	13	47	29	11
pnn	2	1	0	1	0	0	0	0	3	1	0	0	0	0	0	11	0	2	0	5	0	1	0	0	0	0	0	0	0	0	0	0	0	0	2	0	0	0	0	0	0	0	0	2	0	0	0	0	0
sdhc	1	1	0	0	0	0	0	2	0	3	0	0	1	0	0	1	0	0	1	1	1	0	0	0	0	0	0	0	0	0	0	3	0	0	0	0	0	0	0	0	1	0	0	1	0	2	1	0	0
sec61b	4	1	1	0	0	0	1	1	2	1	0	0	0	1	0	1	0	0	0	1	1	0	0	0	0	0	0	0	1	1	0	0	1	0	0	0	0	1	0	2	0	1	2	2	0	0	0	0	0
eef1d	4	1	0	0	1	0	1	0	0	1	0	0	0	0	2	2	0	1	1	0	0	1	0	0	0	0	1	0	0	1	1	0	0	2	2	0	0	0	1	0	0	0	1	0	1	0	1	7	0
LOC108899372	17	1	0	10	0	0	2	0	0	1	0	0	0	0	0	7	0	3	3	1	0	0	1	2	1	1	0	1	0	0	2	0	0	0	3	0	0	0	0	0	0	0	1	0	1	0	2	3	2
LOC108897882	3	1	0	2	0	1	0	1	1	0	0	0	0	0	0	0	0	1	0	0	0	0	0	2	0	1	1	1	1	0	1	0	0	1	0	0	0	1	0	0	0	0	0	0	2	1	3	0	0
srp19	2	3	0	2	1	1	0	1	4	0	0	0	0	2	0	4	0	3	0	11	1	0	1	0	0	0	0	1	1	0	0	1	0	0	0	1	0	0	0	0	0	1	0	0	0	0	0	0	0
atp5j2	2	0	0	0	0	1	0	1	1	0	0	0	0	0	3	1	0	1	5	0	1	0	0	0	0	1	0	0	0	0	0	0	1	1	0	0	0	3	0	0	0	0	0	0	3	1	9	0	0
LOC108875225	3	1	0	0	0	1	2	2	3	0	2	1	2	0	1	1	0	1	1	0	0	1	0	0	1	0	0	0	0	2	1	0	0	1	1	2	0	0	1	0	0	0	0	0	0	0	0	3	0
pomp	3	0	0	1	0	0	1	2	6	0	0	0	0	0	0	2	1	1	0	3	0	2	0	0	1	0	0	0	3	0	0	0	1	0	0	0	2	0	0	0	1	0	0	2	1	2	1	0	0
eif4b	3	0	0	1	0	0	0	0	0	3	2	0	0	0	0	2	0	0	1	1	0	1	0	0	0	1	1	0	0	5	1	1	0	1	0	0	0	0	0	0	0	0	1	1	0	1	0	3	0
psmb3	3	1	0	0	0	1	0	0	0	0	1	0	0	0	0	3	0	0	0	3	0	0	0	0	0	0	1	0	0	0	0	0	0	0	0	0	2	0	0	0	0	0	0	1	1	0	0	0	0
ybx1	11	6	1	7	0	2	2	10	0	5	2	2	2	4	0	2	1	1	0	1	5	2	1	0	10	0	1	1	4	0	4	3	4	2	1	3	5	4	0	0	2	0	4	0	1	0	1	0	1
LOC108873398	3	2	0	2	0	0	1	0	0	0	0	1	0	1	0	6	0	1	3	0	0	0	0	0	1	0	0	0	0	2	0	0	0	0	0	0	0	0	0	0	0	1	1	0	0	0	0	7	0
LOC108893360	3	0	0	0	0	1	0	4	1	2	2	1	0	0	1	1	1	0	4	0	0	1	0	0	0	1	0	0	0	2	0	0	0	0	0	0	1	2	0	1	0	0	0	0	3	1	17	3	0
eef1b2	24	6	1	7	0	3	2	3	4	5	4	0	0	0	2	5	4	2	2	1	1	5	1	0	2	0	4	1	2	4	5	0	0	8	1	4	5	1	1	0	0	2	1	3	1	0	0	10	3
atp5a1	4	0	0	1	0	1	0	0	0	0	2	0	0	0	0	0	0	1	6	0	1	0	0	0	0	0	0	0	0	0	1	0	0	0	0	0	0	0	0	0	0	0	0	0	1	1	7	0	0
tcp1	8	0	1	0	1	1	0	3	1	1	0	0	1	2	0	2	0	0	1	4	0	0	0	0	0	0	0	0	1	1	0	0	0	0	0	1	0	0	0	0	0	1	0	4	0	0	0	0	0
LOC108872514	4	5	0	1	1	0	2	3	0	3	1	0	0	0	0	2	0	0	1	0	0	0	1	0	1	0	0	0	0	0	0	0	0	0	2	1	0	0	0	1	0	0	0	1	0	1	0	0	0
fam32a	1	1	0	1	0	1	2	1	1	0	2	2	2	0	0	4	0	0	2	2	0	1	0	0	0	0	0	0	0	0	1	0	1	0	0	1	1	0	0	1	0	0	0	0	0	0	0	3	1
eif3d	9	0	0	2	0	0	0	0	1	1	0	0	0	1	0	6	0	2	2	0	0	1	0	0	1	2	0	0	0	2	3	0	0	3	0	1	2	1	0	0	0	1	0	0	1	2	0	10	3
kras	4	0	0	0	0	3	0	1	1	2	0	0	1	0	0	1	0	1	1	0	2	0	1	0	0	0	1	0	0	1	0	0	1	0	1	1	0	0	0	0	0	0	0	0	0	1	0	2	1
syf2	1	0	0	0	1	1	1	1	1	2	0	2	0	1	0	8	0	1	0	4	1	0	0	0	1	0	0	2	1	0	0	0	1	0	0	0	0	0	1	0	1	1	0	0	0	0	0	0	0
phlda2	3	0	0	0	0	0	0	0	1	0	0	0	1	0	0	2	1	1	2	0	3	0	0	0	0	0	0	0	0	0	2	0	0	0	1	1	0	0	0	0	0	0	0	0	1	0	1	0	0
garem2	3	0	0	3	0	0	2	1	0	0	2	0	2	0	0	2	0	1	4	0	0	1	1	0	0	0	1	0	2	0	0	0	0	0	4	0	0	0	0	0	0	3	0	0	0	0	0	21	1
eif3g	7	1	0	1	0	2	1	0	2	1	0	2	0	0	1	5	0	1	9	0	1	0	0	0	3	0	2	0	0	0	4	0	0	0	0	1	3	0	1	0	1	1	0	0	0	1	2	15	3
ddx24	14	3	2	1	0	0	0	0	4	0	0	0	0	0	0	4	0	4	4	0	0	0	0	2	0	0	2	0	0	1	0	0	1	0	0	0	0	0	1	0	0	0	0	0	0	0	15	0	1
LOC108879097	14	1	1	0	0	0	0	0	0	0	1	1	0	0	0	6	0	1	0	10	0	0	0	0	1	0	1	0	0	0	2	1	0	2	0	1	0	0	0	0	3	0	1	0	0	0	0	0	3
LOC108875043	2	0	0	1	0	0	0	0	0	0	0	0	0	1	0	3	0	1	6	0	0	0	0	0	1	1	0	0	1	0	0	0	0	0	0	0	1	0	0	0	0	1	0	0	1	1	0	20	1
LOC108882812	0	0	0	0	0	1	0	1	4	0	0	0	0	0	0	0	0	0	0	4	0	0	0	0	0	0	0	1	0	0	0	0	0	0	0	2	0	0	0	0	1	1	0	0	0	0	0	0	0
ddx39a	1	1	0	1	0	0	0	0	0	0	2	0	0	0	0	2	0	1	2	0	0	0	0	0	0	0	1	0	1	0	0	0	0	0	0	0	0	0	0	0	0	0	0	0	0	0	19	0	0
LOC108895836	4	0	0	1	0	0	1	0	0	0	0	0	0	0	0	2	0	1	0	0	0	0	0	0	0	0	1	0	0	1	1	0	1	0	0	0	1	0	0	0	0	0	0	0	1	0	13	0	1
atpif1	2	1	0	0	0	0	0	3	3	1	1	0	1	0	0	2	0	0	2	0	0	0	1	0	0	3	0	1	0	0	0	1	0	2	0	0	1	1	0	0	1	0	0	0	0	1	7	0	0
slc3a2	3	2	0	1	3	2	0	0	0	2	0	1	0	0	1	2	0	1	0	1	3	1	0	0	0	0	1	0	1	0	0	4	0	0	0	1	0	3	0	0	0	0	0	1	0	0	0	2	0
LOC108887331	9	0	5	3	0	0	1	0	0	6	1	1	0	0	1	2	0	0	2	0	3	0	0	3	0	0	0	0	1	2	1	0	0	0	0	0	1	0	0	1	0	0	3	3	4	2	0	0	4
cacybp	0	0	0	0	3	1	0	0	4	0	1	1	0	0	0	0	0	0	2	1	0	0	0	1	0	1	0	0	1	1	0	0	0	0	0	0	0	0	0	1	1	0	0	0	1	0	2	0	0
ddx3x	1	1	1	1	0	1	0	0	0	0	0	1	0	0	0	4	0	0	7	0	2	0	0	0	0	0	0	0	0	0	0	0	0	0	1	0	0	0	0	0	0	0	0	0	0	0	6	0	0
LOC108877268	2	1	0	0	0	0	0	0	0	0	0	0	0	1	2	4	0	2	1	2	1	1	0	0	1	1	0	0	0	0	0	0	0	0	0	0	0	0	1	1	0	0	0	0	0	0	0	0	0
hirip3	0	0	0	0	0	0	2	0	0	0	0	0	0	0	0	6	0	3	14	0	0	0	0	0	0	0	0	3	0	0	1	0	0	0	0	1	0	0	2	1	0	0	0	0	0	1	0	12	0
atp5f1	1	0	0	0	0	3	0	0	0	1	0	0	0	0	0	1	0	4	5	0	1	1	0	0	0	1	0	1	0	2	0	0	0	1	0	0	1	0	0	0	0	0	1	0	0	0	30	0	1
lsm5	1	1	0	0	0	1	0	0	0	1	1	1	0	0	0	2	0	0	3	0	0	0	0	1	0	0	0	0	0	0	0	0	0	1	0	1	0	0	0	0	0	0	0	1	0	0	15	0	0
ik	1	0	0	0	0	1	0	0	0	0	1	0	0	0	0	3	0	0	1	0	3	0	0	0	0	0	0	2	0	0	1	2	0	2	0	0	1	0	1	0	0	0	0	0	0	2	0	10	0
sart1	6	2	0	0	1	1	0	0	0	0	0	0	0	0	0	1	0	0	0	2	0	0	0	0	0	2	0	0	0	0	0	0	0	3	0	0	0	0	0	0	0	0	0	0	0	0	0	1	0
gnb1	8	0	1	3	3	0	0	1	1	0	0	1	0	0	0	0	1	0	4	0	0	1	0	0	0	0	1	0	1	0	0	0	0	0	0	0	0	0	1	0	0	0	0	0	0	0	0	2	0
LOC108880601	0	0	0	3	0	2	0	0	0	0	0	0	0	1	1	3	0	0	0	4	0	0	0	0	1	0	0	0	0	0	2	0	0	0	0	0	0	0	0	0	0	0	0	0	0	0	0	0	0
ptp4a1	6	1	2	0	0	0	1	2	2	0	2	0	0	1	1	3	0	0	0	1	0	1	1	0	2	0	0	1	0	1	1	1	1	0	0	0	0	0	0	0	0	1	0	0	0	0	1	0	3
cct5	4	1	0	0	0	1	0	0	0	1	0	0	0	0	0	3	0	0	3	0	0	0	0	0	0	0	0	0	0	0	3	0	0	0	0	0	0	0	0	0	0	0	0	0	0	0	8	0	0
ndufs5	0	0	0	1	0	2	0	0	0	0	0	0	0	0	0	1	0	0	3	0	0	0	0	0	0	3	0	0	0	0	0	0	0	0	0	0	0	0	0	0	1	0	0	2	0	0	16	0	0
atp5d	6	0	0	1	0	0	0	3	1	2	2	0	0	0	1	1	0	0	4	0	0	0	0	0	1	2	1	0	2	1	3	0	0	3	0	0	0	3	1	0	0	0	0	0	5	0	13	2	0
rbm39	0	0	1	2	0	2	0	1	0	1	0	0	0	0	0	1	0	0	0	2	0	0	0	0	1	0	0	0	0	0	0	1	0	0	0	0	0	1	1	0	1	0	0	0	1	0	0	0	2
LOC108895010	4	1	1	1	2	0	4	1	0	0	1	0	0	0	1	4	0	2	0	0	1	1	0	1	1	0	1	0	0	0	0	1	0	0	0	0	0	2	0	1	0	0	0	2	3	0	5	3	0
cdc5l	0	1	0	0	0	0	0	1	0	1	0	0	0	0	2	3	0	0	8	0	0	0	0	0	1	0	0	0	0	0	2	0	0	0	0	0	0	0	0	0	0	0	0	0	0	0	13	0	0
LOC108882983	2	0	1	0	0	0	0	1	1	1	2	1	2	0	0	1	0	0	0	0	0	0	0	0	1	0	1	2	1	0	1	0	0	0	0	1	0	0	0	0	0	1	0	0	0	0	0	0	2
pfn2	26	2	5	4	4	4	4	5	4	1	3	1	0	0	3	15	0	5	32	4	8	2	0	3	0	2	0	5	1	1	2	2	2	1	2	1	3	1	0	0	3	0	3	1	7	1	32	0	6
LOC108877875	6	1	0	0	0	0	0	3	4	0	0	0	0	0	0	0	0	1	2	4	0	0	0	0	0	0	0	0	0	0	2	0	0	0	0	0	1	0	0	0	1	1	1	0	0	0	0	0	0
LOC108901706	8	2	1	3	0	2	1	6	1	1	4	2	1	0	1	5	1	1	7	1	6	2	0	2	0	1	1	0	0	1	6	0	0	1	0	0	3	1	1	0	0	1	1	0	1	0	34	0	2
ddx18	10	0	0	1	0	3	0	0	0	0	2	3	0	1	0	1	1	0	2	0	1	1	0	1	0	0	0	0	0	1	0	0	0	0	0	0	0	0	0	0	0	0	0	0	0	0	5	0	0
c1qbp	6	0	0	0	0	1	2	0	0	1	0	1	0	0	0	2	0	0	2	0	0	0	0	0	0	0	1	0	0	0	0	0	0	0	0	0	0	0	0	0	0	0	0	0	0	1	5	0	0
pnisr	0	0	2	4	0	0	0	1	0	0	0	0	0	0	1	1	1	5	0	1	0	0	0	0	0	0	0	0	0	0	0	0	0	1	0	0	0	0	0	0	0	1	1	0	0	0	0	0	2
ankzf1	5	0	0	1	1	0	0	0	1	0	1	0	0	0	0	0	1	1	1	0	0	1	2	0	0	0	1	0	0	0	0	0	1	0	0	1	0	0	1	0	0	0	0	2	0	1	6	0	0
lsm7	0	0	0	1	0	0	0	0	0	0	0	0	0	0	0	0	0	1	5	1	0	0	0	0	0	1	0	0	0	0	0	1	0	1	0	0	0	0	0	0	0	2	0	0	0	0	26	0	0
LOC108874897	2	0	1	1	0	2	0	2	1	1	4	0	0	0	1	0	0	1	2	0	2	1	0	0	1	0	4	0	0	0	1	0	3	1	1	6	0	0	4	1	2	2	3	2	2	0	1	8	2
LOC108884463	3	1	0	0	0	1	0	0	0	1	2	0	0	0	0	6	0	0	0	2	1	0	0	1	0	0	1	0	1	0	1	1	0	0	0	1	0	0	0	0	0	0	0	0	0	1	0	1	1
g3bp1	5	0	1	2	0	1	0	0	0	0	0	2	0	0	0	2	0	0	0	0	0	1	2	0	0	0	0	0	0	0	0	0	0	0	0	0	0	0	2	0	0	0	0	0	0	0	0	3	0
sod1	4	0	0	1	0	0	1	0	1	0	0	0	0	1	0	1	0	1	0	2	0	0	0	0	0	0	0	0	1	2	0	1	0	0	1	0	0	0	0	0	1	0	1	1	0	2	0	0	0
LOC108895244	10	1	1	2	0	0	0	2	0	1	2	0	0	1	0	2	0	3	0	0	2	0	0	0	1	1	1	0	1	1	0	0	2	2	0	1	0	1	0	0	0	0	0	0	0	0	4	0	0
fam133b	7	0	0	0	0	2	0	0	0	0	1	0	0	0	0	2	2	0	2	0	0	0	0	0	0	0	0	0	0	0	0	0	0	0	0	1	0	1	0	0	0	0	1	0	0	0	0	6	0
LOC108897142	4	0	0	0	0	0	0	0	0	0	0	0	0	0	0	5	0	0	2	0	0	0	0	0	0	0	0	0	0	0	0	0	0	3	0	0	1	0	0	0	0	0	0	0	0	0	8	1	0
sec61g	2	1	0	0	0	0	0	2	1	0	0	0	1	0	0	0	0	0	0	0	0	1	0	0	1	0	1	0	0	0	0	0	0	0	0	0	1	0	0	0	0	0	1	0	0	1	0	2	0
rbx1	3	0	0	1	0	0	0	0	1	0	1	1	0	1	0	1	0	0	0	0	0	0	0	0	2	0	0	0	0	0	0	1	0	0	0	1	0	0	1	0	0	0	0	1	0	0	0	0	0
LOC108872789	5	0	1	1	1	0	1	0	0	0	0	4	0	0	0	3	0	2	0	1	0	1	0	0	3	0	0	0	2	0	5	0	0	0	1	1	0	0	1	0	0	1	0	0	0	0	1	3	0
LOC108874402	0	0	0	0	0	0	1	0	0	0	0	1	0	0	2	0	0	0	1	0	0	0	0	0	0	0	0	0	1	1	1	0	0	0	0	0	0	0	0	0	0	2	0	0	0	1	0	4	0
gadd45gip1	0	0	0	1	1	0	0	0	2	1	0	0	0	1	0	3	0	0	3	0	0	0	0	0	0	0	0	5	0	0	0	0	0	0	0	0	0	0	1	0	0	0	0	0	0	0	0	14	0
shfm1	1	0	0	0	1	0	0	1	5	0	0	0	0	1	0	1	0	0	0	2	3	0	0	0	0	0	0	0	0	1	0	1	0	0	0	0	0	0	0	0	0	1	0	1	0	0	0	0	0
ssr4	7	0	0	0	0	0	0	1	0	0	0	0	1	0	0	1	0	0	0	1	0	0	3	1	0	0	0	0	0	0	1	0	0	0	0	2	0	0	0	0	2	0	1	0	0	0	0	0	0
LOC108889496	3	1	0	0	0	2	0	1	1	0	0	0	1	0	0	1	0	1	2	1	0	0	0	0	0	0	0	0	1	0	0	0	0	1	0	0	0	0	0	0	0	0	0	1	0	0	6	0	0
LOC108892119	0	0	0	0	0	0	0	0	0	0	0	0	0	0	0	0	0	0	0	0	0	0	0	0	0	1	0	0	0	0	0	0	0	0	0	0	0	0	0	0	0	0	0	0	0	0	0	0	0
snrpd1	1	1	0	0	0	1	0	0	0	0	0	1	0	0	1	2	1	0	0	5	0	0	0	0	1	1	0	0	1	0	0	0	0	0	1	0	0	1	0	0	1	0	0	0	1	0	2	0	2
LOC108897492	3	0	0	1	0	1	1	1	2	0	2	0	0	0	0	2	0	1	4	0	2	0	0	1	0	0	0	4	1	1	0	0	0	1	0	0	1	1	0	0	1	0	0	0	3	0	8	0	0
tcerg1	2	0	1	0	0	0	0	0	0	0	0	0	0	0	0	5	0	0	0	3	0	0	0	0	0	0	0	0	0	0	0	0	0	0	0	0	1	0	0	0	2	0	0	0	1	0	0	0	1
LOC108902508	7	1	0	1	0	2	0	1	0	1	1	2	0	0	0	4	0	0	8	0	0	0	0	0	0	1	0	0	0	0	0	0	1	0	0	1	0	0	0	1	0	0	0	0	0	0	18	3	0
gtf2b	0	0	0	0	0	2	0	0	1	0	0	0	0	0	0	2	0	0	10	0	1	1	0	0	0	0	0	0	0	0	0	0	0	0	0	0	0	0	0	0	0	1	0	0	0	0	0	12	1
ndufb10	0	2	0	0	0	1	0	0	1	0	1	0	0	0	1	3	0	0	0	0	0	1	1	0	0	0	0	0	0	0	2	0	0	0	0	0	0	0	0	0	1	0	0	1	0	0	14	0	0
etf1	12	1	0	0	0	2	0	0	0	0	1	1	0	1	0	3	0	0	2	0	0	0	0	0	0	0	0	0	0	0	0	0	0	0	0	0	0	0	0	0	0	0	0	0	0	0	0	2	0
otub1	1	0	0	1	0	0	0	0	0	2	2	0	0	0	1	2	0	0	3	0	0	1	0	0	0	2	0	0	0	1	1	1	0	2	0	1	0	0	0	1	0	0	0	0	0	0	20	0	0
nop10	4	0	0	0	2	1	0	0	0	0	0	0	0	0	3	0	0	0	3	0	0	0	0	0	0	0	0	0	0	1	0	1	1	2	1	0	0	0	0	1	0	1	0	1	0	0	7	1	1
LOC108889222	0	0	0	0	0	0	0	0	2	0	0	0	0	2	0	3	0	1	2	0	0	1	0	1	0	0	0	0	0	1	0	0	1	0	0	0	0	2	0	0	1	0	0	0	2	0	12	0	0
LOC108898154	1	0	2	1	1	0	2	1	3	1	1	0	0	0	0	2	1	0	1	0	1	0	2	0	0	2	0	0	2	0	2	0	0	0	1	1	1	0	0	0	0	0	0	0	1	0	7	0	2
LOC108891677	1	0	0	0	0	0	0	0	3	0	1	0	0	0	0	0	1	1	3	2	0	0	1	0	0	0	3	0	0	2	0	0	0	1	0	0	1	0	0	0	0	0	0	0	0	0	5	0	0
cfl2	5	0	1	0	0	1	0	3	1	0	1	0	0	0	0	0	0	1	4	0	0	0	0	0	0	0	0	1	0	0	3	1	0	0	1	1	0	0	0	0	0	0	0	1	0	0	10	0	0
csnk1a1	1	2	0	0	1	1	0	2	0	1	0	0	0	0	0	1	0	0	0	0	0	0	0	2	2	0	0	0	0	1	2	0	0	0	0	0	0	0	0	0	0	0	0	0	0	2	6	0	1
LOC108893393	1	0	0	2	0	0	0	0	0	0	0	0	0	0	1	0	0	0	2	0	1	0	0	0	0	1	0	1	0	0	0	2	1	0	0	2	0	2	0	0	0	0	1	0	1	1	10	0	0
LOC108896148	5	2	0	1	0	4	2	1	3	1	2	0	0	0	0	3	2	0	2	0	2	0	0	0	0	2	1	0	0	0	2	1	0	0	3	0	1	2	0	0	1	1	3	0	2	0	11	0	1
LOC108875029	0	1	0	0	0	0	0	0	0	0	1	0	0	0	0	6	0	0	3	0	1	1	0	0	0	0	0	0	0	1	0	0	0	0	0	1	0	0	0	0	0	0	0	0	0	0	0	7	0
LOC108890849	2	1	0	0	1	0	0	0	0	0	1	1	0	0	0	4	0	1	1	0	0	0	0	2	0	0	1	0	0	0	1	1	0	0	0	1	0	0	0	0	0	0	0	0	0	0	15	0	0
LOC108893480	3	0	1	0	0	0	0	0	1	0	3	2	0	0	0	0	0	0	3	0	1	0	0	0	0	0	0	0	0	1	0	1	0	0	0	0	0	0	0	0	2	0	0	0	1	0	0	2	0
dkc1	13	1	0	2	0	3	2	1	2	0	1	0	0	1	1	11	0	3	0	0	0	0	1	0	1	0	0	0	0	0	0	0	0	0	2	0	2	0	2	0	0	1	2	0	0	0	1	11	0
psmd14	1	0	0	0	1	2	1	0	2	1	0	0	0	0	1	1	1	0	0	3	1	0	0	1	1	0	0	0	1	1	0	1	0	0	0	1	0	1	0	0	0	1	0	3	0	0	0	0	0
elavl2	2	1	0	0	0	0	0	0	0	0	0	0	0	0	0	7	0	1	0	0	0	0	0	0	0	0	0	0	0	1	0	0	0	0	0	2	0	0	0	0	0	0	0	1	0	0	0	3	0
ndufab1	0	1	0	0	0	1	0	0	0	0	0	0	0	0	0	0	0	1	3	0	0	0	0	0	0	0	0	0	0	0	0	0	0	2	0	0	0	0	0	0	0	0	0	0	1	0	13	0	0
skp1	0	0	0	1	0	0	0	1	0	0	0	0	0	0	0	0	0	0	0	4	1	1	1	0	1	0	0	0	0	0	0	1	0	0	0	0	0	0	0	0	0	0	0	0	0	0	0	0	0
LOC108894793	2	0	1	0	0	0	1	0	0	0	0	0	1	1	0	3	0	1	0	0	0	0	0	0	0	0	0	0	0	0	0	0	1	0	0	0	0	0	0	1	0	0	0	0	1	0	4	0	0
dpy30	0	0	0	0	1	0	0	0	0	0	0	0	0	0	0	3	0	1	1	0	0	0	0	0	0	1	0	0	0	0	0	1	0	0	0	0	0	0	0	0	0	0	0	0	1	0	0	7	0
ckb	1	1	0	1	0	0	0	2	1	0	6	0	0	0	0	1	0	0	1	0	0	0	0	0	0	2	0	3	0	3	0	0	0	0	0	2	0	0	0	0	1	0	1	2	1	0	7	3	0
slc25a3	0	0	1	1	0	0	1	0	0	2	1	0	0	0	2	0	0	0	0	1	0	0	1	0	1	0	0	0	0	0	1	1	1	0	0	0	0	1	0	0	0	0	0	0	0	0	0	0	1
ddx23	0	0	0	0	1	1	0	0	0	0	0	0	0	0	0	2	0	2	3	0	2	1	0	0	0	0	0	0	1	0	1	0	0	0	1	0	1	0	0	0	0	0	0	0	0	0	7	0	1
cnpy3	4	0	0	1	0	0	0	4	0	0	0	0	0	0	0	0	0	0	1	0	0	0	0	0	0	0	0	0	0	0	0	0	0	0	0	0	0	0	0	0	0	0	0	0	0	2	4	0	0
ppib	3	0	0	3	0	2	0	5	0	0	0	2	0	0	0	0	0	0	0	0	1	0	0	1	1	0	0	0	1	2	1	0	0	0	0	0	0	0	0	0	0	0	1	0	0	2	2	1	1
alyref	1	2	0	2	0	3	1	0	2	3	2	1	2	0	4	6	3	1	1	0	0	0	0	0	0	1	0	2	0	0	1	0	0	0	0	1	0	1	0	0	0	2	0	2	2	0	9	1	0
caprin1	8	0	0	2	0	0	0	0	0	0	1	0	0	0	0	3	1	1	1	0	0	0	0	0	0	1	0	1	1	0	2	0	0	0	0	0	0	0	0	0	0	0	1	0	0	0	8	0	0
LOC108874542	0	0	0	1	1	1	0	1	1	0	0	0	0	0	0	0	0	0	2	0	0	0	0	0	0	0	0	0	2	0	1	0	0	0	0	1	0	0	1	0	0	0	0	0	1	0	0	7	0
psma3	3	0	0	0	0	0	1	1	3	0	0	0	1	0	0	3	0	0	0	3	0	0	1	0	0	0	0	0	1	0	0	0	0	0	0	0	0	0	0	0	0	0	0	0	0	0	0	0	0
dnajc8	1	0	0	0	0	0	2	0	0	0	0	1	0	1	0	6	1	0	3	0	1	0	0	1	2	0	0	0	0	0	0	0	0	0	0	0	0	0	0	1	0	0	0	0	0	0	1	6	0
LOC108890157	1	0	0	0	0	1	0	2	0	0	0	0	0	1	0	1	1	0	2	1	0	0	0	2	0	0	1	0	0	0	2	0	0	2	0	0	0	1	0	0	0	0	0	0	0	3	10	2	0
psma1	2	0	0	0	0	1	0	1	1	0	0	0	0	1	0	1	0	1	0	3	1	0	0	0	1	0	1	0	0	0	0	0	0	0	1	0	0	0	0	0	2	0	0	1	0	0	0	0	0
srp72	4	0	1	0	0	0	0	0	0	0	0	0	0	0	0	4	0	0	0	2	0	0	0	0	0	0	0	0	0	0	0	0	0	0	0	1	1	0	0	1	0	0	0	0	1	0	0	0	1
atp5b	12	0	1	0	0	0	3	3	0	2	1	0	1	0	1	0	0	2	2	1	0	0	1	1	0	2	0	4	0	0	1	1	0	0	0	0	0	1	0	0	0	0	0	0	0	2	15	2	2
fcf1	2	0	0	0	0	0	0	0	1	0	0	0	0	0	0	0	0	0	2	1	0	0	1	0	0	0	0	0	0	0	0	0	0	0	0	0	0	0	1	2	0	0	0	0	1	0	0	5	0
ndufa13	1	0	0	0	0	1	1	0	0	1	0	0	1	0	0	3	1	0	5	0	1	0	0	0	0	0	0	0	0	1	0	1	1	0	0	0	0	0	0	0	0	0	0	1	0	0	10	0	0
puf60	2	1	0	0	0	0	0	0	1	0	1	0	0	0	0	2	0	1	0	2	1	0	0	0	1	0	0	0	1	0	0	0	0	0	1	0	0	0	0	0	0	1	0	0	0	0	0	0	1
psmb4	3	0	0	2	0	1	0	1	1	0	0	0	0	0	0	3	0	0	0	4	1	0	0	0	0	0	0	0	0	1	0	0	1	0	1	0	0	0	0	0	0	0	0	1	0	1	0	0	0
ndufb4	0	1	0	0	0	0	0	1	0	0	0	0	0	1	0	1	0	0	1	0	0	0	0	0	0	1	0	1	0	0	0	0	0	0	0	0	0	0	0	0	0	0	0	1	0	0	10	0	0
LOC108888178	3	0	0	0	0	2	0	2	1	1	0	0	1	0	0	0	0	0	5	0	0	0	1	2	0	1	1	0	0	0	0	0	0	1	1	0	0	0	0	0	0	2	0	0	1	0	12	0	0
psma8	0	0	0	2	0	0	2	0	7	0	0	0	0	0	0	5	0	0	0	7	0	1	0	0	0	0	0	0	2	1	0	0	1	0	0	0	0	0	0	0	0	3	0	3	1	1	0	0	0
prmt1	4	1	1	1	0	0	0	0	0	0	0	1	0	0	0	3	0	0	0	3	1	0	0	0	0	1	0	1	0	1	1	0	0	0	0	0	1	0	0	0	0	1	0	0	0	0	0	0	2
slu7	1	0	0	0	0	0	1	1	2	0	4	0	0	1	0	1	0	1	0	5	1	0	0	0	1	0	0	0	1	0	0	0	0	0	0	0	1	0	0	0	0	0	0	0	0	0	0	0	0
tmed2	1	1	0	1	0	0	0	2	2	1	0	0	0	0	0	2	0	0	0	1	0	0	1	0	3	0	0	0	0	1	0	1	0	3	0	0	1	0	0	0	1	0	1	0	0	0	0	0	0
cfl1	2	3	0	5	0	1	3	4	2	1	2	0	0	0	1	5	0	0	3	0	0	0	3	0	0	1	2	1	0	0	1	0	0	2	3	0	0	1	0	1	0	0	0	1	2	1	6	4	2
gltscr2	3	0	0	0	0	1	0	0	0	0	0	0	0	0	0	5	0	1	1	0	0	0	0	0	0	0	0	1	0	0	1	1	0	3	0	0	0	0	0	0	0	0	0	0	0	0	0	2	0
gkap1	2	0	0	0	0	0	0	0	0	0	0	0	0	0	0	8	0	0	2	0	0	1	0	0	0	0	1	0	0	0	0	0	0	1	0	0	0	0	0	0	0	0	1	0	0	0	0	15	0
ran	10	2	0	0	0	1	1	1	4	2	1	2	2	3	0	9	1	2	0	8	0	0	0	0	2	0	0	1	1	0	1	0	0	0	0	5	2	1	1	0	1	1	0	5	1	2	2	0	1
grpel1	2	0	1	0	0	1	0	0	2	0	0	1	1	0	0	3	0	1	1	0	1	0	0	0	0	0	0	0	0	1	0	1	0	1	0	1	0	0	1	1	0	0	0	0	0	1	0	1	1
srsf11	0	1	1	0	0	0	0	0	1	1	0	0	0	1	1	0	0	0	0	3	0	1	0	0	3	1	0	1	0	0	0	1	0	0	0	0	0	0	0	0	0	1	2	0	2	0	0	0	0
LOC108874760	0	0	1	1	0	1	0	0	0	0	0	0	0	0	0	1	0	0	2	0	1	0	0	0	0	0	2	0	1	0	0	0	0	0	0	1	0	0	1	0	0	0	0	0	0	0	0	10	0
LOC108899722	1	0	0	1	0	0	0	1	0	3	1	0	0	1	0	0	0	0	6	0	0	1	0	2	0	1	1	0	1	1	1	0	0	0	1	0	0	1	0	0	1	0	0	0	0	0	7	0	0
atp5c1	0	1	0	0	0	0	0	3	2	0	3	0	0	0	1	2	0	1	4	0	1	1	0	0	0	1	0	0	0	0	0	0	0	0	0	1	0	0	0	0	0	0	1	0	1	0	21	0	0
LOC108889351	3	0	1	0	0	0	2	0	0	0	0	0	0	0	0	1	0	0	3	0	0	0	0	1	0	0	0	0	1	0	0	0	0	0	0	0	0	1	0	0	0	0	0	0	0	0	8	0	0
fam46c	3	0	0	1	2	0	0	0	2	0	0	3	0	0	1	0	0	0	0	1	0	0	0	0	0	1	0	0	0	1	0	1	0	0	0	1	0	0	0	0	0	0	0	0	1	0	0	0	0
hdac1	0	1	0	0	0	0	1	0	0	0	0	0	0	1	0	8	0	0	3	0	0	0	1	0	1	0	0	2	0	0	0	0	0	0	0	0	0	0	1	0	1	0	0	0	0	0	0	12	0
arl6ip1	1	0	1	1	0	0	0	3	1	0	1	0	0	0	0	1	0	1	0	0	0	1	0	0	0	0	0	0	0	1	0	0	1	0	0	1	0	1	0	0	0	0	1	0	0	0	1	0	0
eif4a3	0	1	0	0	0	0	1	0	0	0	0	0	0	0	0	1	0	0	1	2	1	1	0	0	1	0	0	0	0	0	1	0	0	0	0	1	0	0	0	0	0	1	1	0	0	1	0	6	1
LOC108876274	4	1	1	0	1	0	1	1	2	0	1	1	0	0	0	3	0	1	1	0	1	1	0	0	0	0	0	0	0	0	1	0	0	1	0	0	1	1	0	1	0	0	0	0	1	0	0	10	0
LOC108889121	4	1	0	0	0	2	0	0	0	0	0	4	0	0	0	3	0	0	1	0	0	0	0	1	0	2	0	0	0	0	0	0	0	0	0	0	0	0	0	0	0	0	0	0	0	0	2	0	0
LOC108895809	3	1	0	1	2	3	1	2	0	0	0	1	3	0	0	4	0	0	3	0	0	0	1	0	0	0	1	0	0	1	0	1	0	3	1	0	0	1	0	1	1	1	2	0	2	1	13	3	1
snrpb2	0	0	0	0	2	0	0	0	0	0	0	0	0	0	0	3	0	0	0	5	0	0	1	0	0	0	0	0	0	0	0	0	0	0	0	0	0	0	0	0	2	0	0	0	0	0	0	0	0
LOC108876189	3	0	0	0	0	1	0	0	2	0	0	0	0	0	0	3	1	0	1	0	0	0	0	0	0	0	0	0	0	0	0	1	0	0	0	0	0	4	0	0	0	0	0	0	0	0	1	7	1
zranb2	6	2	0	0	0	0	0	0	0	3	0	0	0	0	2	3	0	2	0	1	0	0	0	1	0	0	0	0	2	0	0	2	0	0	0	0	0	0	0	0	0	2	0	2	1	0	0	0	0
snu13	1	0	2	0	0	1	0	0	0	0	0	0	0	0	1	0	0	0	0	2	0	0	0	0	2	1	0	0	1	0	0	0	0	1	0	0	0	0	0	0	1	0	0	1	0	2	0	0	0
LOC108873085	1	3	0	0	1	4	0	0	3	0	0	1	0	0	2	2	1	0	2	1	0	0	1	2	1	0	2	0	0	1	1	0	0	0	1	0	0	2	0	0	0	0	0	0	1	3	2	0	1
nop56	19	1	1	0	0	1	2	3	0	0	3	0	0	0	0	6	1	3	3	0	0	0	1	0	0	0	0	0	1	0	0	0	0	1	1	2	0	3	0	0	2	0	0	0	0	0	11	0	0
blcap	2	0	1	4	0	1	1	4	2	1	1	0	0	0	0	1	0	2	3	1	0	0	1	0	0	0	0	1	0	0	0	0	0	0	0	0	1	1	0	2	0	0	0	0	0	0	4	0	0
LOC108901915	72	20	18	29	26	15	19	27	30	12	18	8	2	8	14	36	9	19	11	3	11	16	14	18	13	20	5	12	8	31	4	15	24	12	7	80	4	25	6	4	18	29	11	7	11	9	22	41	17
LOC108885601	1	0	0	1	0	0	0	0	0	0	0	0	0	1	0	2	0	0	0	1	0	0	0	0	0	0	0	0	1	0	0	0	0	0	0	0	0	0	0	0	0	0	0	0	0	0	0	0	0
LOC108890957	6	0	1	1	1	4	3	0	1	0	1	1	1	1	1	10	0	2	13	0	1	1	0	1	0	2	0	1	0	0	2	0	0	1	2	2	0	0	1	0	0	1	1	1	0	0	43	0	1
taldo1	1	0	0	0	0	1	0	3	1	0	0	1	0	2	0	1	0	0	0	3	0	0	2	0	1	0	1	0	0	0	1	1	0	1	1	1	1	0	0	0	0	1	0	0	0	0	1	0	0
LOC108898546	10	4	0	3	1	2	3	7	2	7	5	1	3	0	0	7	1	1	9	0	0	1	0	2	0	5	0	0	0	3	4	0	1	1	0	2	3	5	0	0	2	2	2	0	1	0	29	3	0
polr2l	1	0	0	0	0	0	0	1	0	0	0	0	0	0	0	2	0	0	0	0	0	0	0	0	0	0	0	0	0	0	0	0	0	1	0	0	0	0	1	0	0	0	0	0	0	0	0	0	0
csnk1e	2	0	0	0	1	0	0	0	1	0	0	0	0	0	0	1	0	0	0	0	1	0	0	0	0	1	0	0	0	0	0	0	0	1	1	0	1	0	0	0	0	0	1	0	0	0	5	0	0
sarnp	1	0	0	0	0	1	0	0	1	0	0	0	0	0	0	2	0	0	2	7	1	0	0	0	0	0	0	0	0	0	0	0	0	0	0	0	0	0	0	0	0	0	0	0	0	0	0	0	0
LOC108888514	2	0	0	0	0	0	1	0	0	0	0	0	0	0	0	1	2	0	6	0	0	0	1	0	0	1	0	0	0	0	0	0	0	0	0	0	1	0	0	0	0	0	0	0	0	1	10	0	0
npc2	2	1	0	1	2	3	3	5	5	2	1	3	1	2	1	3	0	0	1	1	1	1	0	3	1	0	0	4	0	1	1	0	1	2	3	1	0	6	1	2	2	2	0	1	2	3	5	0	0
atp5o	1	0	0	1	0	2	0	3	1	0	1	0	0	0	0	0	0	1	0	0	0	0	0	0	0	0	0	0	0	0	0	1	0	2	0	0	1	1	0	0	0	0	0	0	0	0	14	0	0
LOC108897473	0	0	0	0	0	0	0	0	0	0	1	0	0	0	0	5	0	0	0	0	0	0	0	0	0	0	0	0	0	0	0	0	1	0	0	0	0	0	0	0	0	0	0	0	2	0	4	1	0
edf1	5	0	0	0	0	0	0	0	3	0	0	1	1	0	0	2	0	0	1	0	0	1	0	0	2	0	3	0	1	1	0	1	2	0	0	2	1	0	0	0	0	0	0	0	1	1	0	7	0
abce1	2	0	0	0	0	1	0	0	0	0	0	0	1	0	0	2	0	0	0	0	1	0	0	1	0	0	0	1	0	0	0	2	0	0	1	3	0	1	0	0	1	0	1	0	0	0	3	0	0
LOC108890490	2	1	0	1	0	1	0	1	2	3	0	0	0	0	1	0	0	0	0	0	0	0	0	0	1	0	1	0	1	2	1	0	0	0	0	0	0	0	0	1	0	0	0	0	1	0	2	0	0
cldn7	3	1	5	0	1	0	0	0	0	0	0	3	0	0	0	0	0	1	1	0	0	0	0	0	0	0	0	0	0	0	0	0	0	0	1	1	1	1	1	0	0	0	0	0	0	0	8	0	2
LOC108878925	0	0	0	0	0	0	0	0	0	0	0	0	0	0	0	1	0	0	0	3	0	0	1	0	0	0	0	0	0	0	0	0	0	0	0	1	0	0	0	0	3	0	0	0	0	0	0	0	0
ndufb7	0	0	1	0	0	0	0	0	0	0	0	1	0	0	0	3	0	0	0	0	0	0	1	0	0	0	0	0	0	0	0	0	0	0	0	0	0	1	0	0	0	0	0	0	0	0	6	0	0
med21	0	1	0	1	0	0	0	0	1	0	0	0	1	0	0	1	0	0	1	0	0	0	1	0	0	0	1	0	0	1	0	0	0	0	0	0	0	0	0	0	0	0	1	0	1	0	1	0	0
cnp	3	0	0	1	0	0	1	0	4	0	0	1	0	0	0	2	1	1	0	1	0	0	0	0	1	0	0	0	0	0	0	0	0	0	0	1	0	0	0	0	0	0	0	0	0	0	5	0	0
sub1	0	0	0	1	0	0	0	0	0	0	0	0	0	0	0	0	0	1	0	1	0	0	0	1	0	0	0	0	0	0	0	1	0	0	0	0	2	0	0	0	0	0	0	0	0	0	0	0	0
btg3	1	0	0	1	0	3	0	1	1	0	0	2	0	0	1	0	1	0	6	1	2	0	0	0	0	0	0	0	0	0	2	0	0	1	2	0	0	1	0	0	0	0	1	0	0	0	2	0	0
LOC108883784	2	1	0	0	0	1	0	0	1	0	0	3	0	0	0	4	1	2	0	0	0	0	0	0	0	0	0	0	0	0	0	0	1	0	0	0	0	0	1	0	0	0	0	0	1	0	0	0	4
pcbp2	4	0	0	0	0	0	1	0	0	1	0	1	0	0	0	3	0	0	2	0	0	0	0	0	0	0	1	0	0	0	0	2	0	0	0	0	0	0	0	0	0	0	0	0	0	1	4	0	0
psmc3	1	0	0	0	0	0	0	0	2	0	0	0	0	0	0	1	0	0	0	0	0	0	0	0	0	0	0	0	1	0	0	0	0	0	0	0	0	0	0	0	0	0	0	0	0	0	0	0	0
atp5e	0	0	0	0	0	0	0	0	2	0	0	0	0	0	1	1	0	0	2	0	0	0	0	0	0	0	0	0	0	1	0	0	0	0	0	0	0	0	1	1	0	1	0	2	0	0	2	0	0
vamp3	0	0	0	0	0	0	0	0	0	0	0	0	0	0	0	4	0	0	0	3	0	0	0	0	0	0	0	0	0	0	0	0	0	0	0	1	0	0	0	0	0	0	0	1	1	0	0	0	0
cirbp	19	2	1	3	1	11	1	1	6	3	5	2	4	1	3	18	0	0	9	0	2	2	1	1	5	7	2	4	2	2	0	2	2	3	1	6	1	3	1	2	1	0	3	5	3	4	21	4	2
LOC108881323	1	0	0	0	0	0	0	0	1	0	0	1	0	0	0	0	0	1	0	0	0	0	0	0	0	0	0	0	0	0	0	0	0	0	0	0	0	0	0	0	0	1	0	0	2	0	1	0	0
LOC108876083	2	1	1	1	0	0	0	1	1	2	0	1	0	0	0	6	0	0	0	0	1	0	0	0	0	0	2	0	0	2	0	0	0	0	1	1	0	0	2	0	0	1	0	1	0	0	0	10	2
LOC108875236	0	0	1	0	0	0	0	0	0	0	0	0	1	0	0	1	0	0	4	0	0	0	0	0	0	0	1	0	0	0	0	2	0	0	0	2	0	0	0	0	0	0	2	0	2	0	1	3	0
LOC108888558	1	0	0	0	0	0	0	0	1	0	0	0	0	0	0	0	0	0	1	0	0	0	0	0	3	1	0	0	0	0	0	1	0	0	0	0	0	0	0	0	0	0	0	0	0	0	4	1	0
LOC108876623	3	1	3	0	0	1	0	1	3	0	3	2	0	0	0	2	0	1	5	0	0	0	0	1	1	0	1	0	0	2	0	0	0	0	0	2	0	0	1	0	0	2	0	0	1	0	0	8	0
LOC108876550	4	0	0	1	0	1	0	1	0	0	0	0	0	0	0	1	0	0	0	0	1	1	1	0	0	0	0	0	0	0	0	0	0	0	0	1	0	0	0	0	0	0	0	0	0	0	1	6	0
stx4	0	1	0	0	0	0	1	0	0	0	0	0	1	0	0	0	0	0	0	3	0	0	0	0	0	0	0	1	0	0	0	0	1	0	0	0	0	0	0	0	0	1	1	0	0	1	0	0	0
LOC108895573	10	1	0	2	3	2	0	2	1	3	4	0	3	1	0	11	1	6	6	0	2	1	0	2	1	3	0	0	0	2	0	3	1	3	0	0	1	2	2	0	0	2	0	0	0	2	45	1	1
LOC108899083	0	0	0	1	0	0	0	0	0	0	0	0	0	2	0	1	1	1	4	0	1	0	1	1	0	0	0	0	0	0	0	0	0	0	0	0	0	0	0	0	0	0	0	0	0	0	5	0	0
rbm42	2	0	0	1	0	0	0	0	2	1	0	0	1	1	0	1	0	0	0	1	0	0	0	1	0	0	0	0	0	0	0	1	0	0	0	0	0	1	0	0	0	0	1	0	0	0	0	0	0
ndufb2	2	0	2	1	0	0	0	0	0	0	0	1	0	0	1	4	0	0	2	0	0	0	0	0	2	1	0	0	0	0	0	0	0	0	0	0	0	0	0	1	0	1	0	0	1	1	10	0	1
rrp15	2	0	0	0	1	0	0	0	0	2	0	0	0	0	0	0	0	0	0	2	0	0	0	0	0	0	1	0	1	0	0	0	0	0	0	0	0	0	0	0	0	0	2	0	1	0	0	1	0
psmg1	1	0	0	2	1	0	0	0	0	0	0	0	0	0	0	0	0	0	0	0	0	0	0	0	0	0	0	0	0	0	0	0	0	1	0	0	1	0	0	1	1	0	0	0	0	1	0	1	0
selenoh	2	1	0	0	0	0	0	0	0	0	1	1	0	1	0	0	0	1	0	2	2	0	0	0	1	0	0	0	0	1	0	0	0	0	3	1	0	0	0	1	0	0	0	0	0	0	0	0	0
arglu1	0	0	0	0	0	0	0	0	0	0	1	0	0	0	0	3	0	0	0	0	0	0	1	0	0	1	0	1	0	0	0	0	0	0	0	0	1	1	0	0	0	0	1	0	1	0	4	0	0
cep295	0	0	0	0	0	0	0	0	0	0	0	1	0	0	2	1	0	0	2	0	0	3	0	0	0	1	0	0	1	0	0	0	0	0	0	0	3	0	0	0	1	0	0	0	0	0	3	0	0
tmem11	0	0	0	0	0	0	0	0	0	0	0	3	0	0	0	2	1	0	0	0	1	0	0	0	0	0	0	0	0	0	0	0	0	2	0	0	0	0	0	0	0	1	0	0	0	0	0	0	0
LOC108872926	2	1	0	0	1	0	0	1	0	0	0	0	0	0	0	1	0	1	3	0	0	0	0	0	1	0	2	0	0	0	1	0	0	0	0	0	0	1	1	0	0	0	1	1	1	0	1	1	0
LOC108899918	7	0	0	0	1	0	0	0	0	0	0	0	0	0	1	3	0	0	4	0	1	0	0	1	0	0	0	0	0	1	0	1	0	3	0	0	0	1	0	0	0	1	0	0	0	0	9	0	0
LOC108894806	1	0	0	2	0	0	0	0	0	0	2	1	1	0	3	1	0	0	0	0	0	3	1	0	0	1	0	0	0	0	0	0	0	0	0	4	1	0	0	1	2	0	0	0	2	1	4	1	0
LOC108882284	0	0	0	0	0	1	0	3	1	1	0	0	0	1	0	1	0	1	0	1	0	0	0	0	0	0	0	0	0	0	0	0	0	0	0	0	0	0	0	1	0	1	0	1	0	0	0	0	0
ggnbp2	0	0	0	0	2	0	1	0	1	0	0	1	0	1	0	0	0	0	1	0	0	1	0	0	0	0	0	0	0	0	0	0	0	0	0	0	0	0	1	0	0	0	0	0	0	0	1	2	0
LOC108887155	46	16	4	22	21	10	6	16	12	25	26	5	7	14	11	22	9	5	14	5	11	42	16	34	9		12	6	10	8	11	17	4	27	2	10	12	36	9	2	9	15	10	10	8	13	37	11	9
snrpf	1	0	0	1	1	0	0	1	0	0	0	0	0	0	1	0	1	0	0	1	0	0	0	0	0	0	0	0	1	0	0	0	0	0	0	1	0	0	0	0	0	0	0	0	0	0	0	0	0
srek1ip1	0	0	0	0	0	2	0	0	1	0	0	0	1	0	0	1	0	1	0	1	0	0	0	0	1	0	0	1	0	0	0	0	0	0	0	0	1	0	0	0	0	0	0	0	0	0	0	0	1
LOC108897250	3	0	0	0	0	0	0	1	0	1	1	0	0	0	0	1	0	1	1	0	1	0	0	0	0	1	0	1	0	0	0	0	0	0	1	0	1	0	0	0	0	1	0	1	0	0	0	1	0
LOC108895889	1	1	0	0	0	0	0	1	0	1	2	0	0	0	0	1	0	0	0	0	0	0	1	0	0	0	0	0	0	0	0	0	0	1	0	0	0	1	1	0	0	0	0	0	2	0	0	1	1
LOC108902685	1	0	0	1	0	0	0	1	0	0	0	0	0	0	0	0	0	0	1	0	0	1	0	1	0	0	0	0	2	0	1	2	0	0	0	0	0	0	1	0	1	0	0	0	0	0	5	0	1
LOC108873139	0	0	0	0	0	0	1	2	1	1	1	0	0	0	0	1	0	0	0	0	1	0	2	0	1	0	1	0	0	2	0	0	0	1	2	1	0	0	4	1	0	0	0	0	0	0	0	2	1
u2surp	2	0	0	2	0	1	0	0	1	0	0	1	0	1	0	6	0	0	0	5	1	0	0	1	0	0	1	1	0	0	1	2	3	0	0	0	3	0	0	2	1	0	0	0	0	0	0	0	0
thoc3	1	0	0	0	0	0	0	0	0	0	0	1	0	3	0	2	0	0	0	2	0	0	0	1	1	0	0	0	1	0	0	0	0	0	0	0	0	0	2	0	0	0	2	0	1	0	0	0	0
supt4h1	1	0	0	0	0	1	0	0	0	0	0	0	0	0	0	2	0	1	0	0	0	1	0	1	1	0	0	0	0	0	0	3	0	2	0	0	0	0	0	0	0	0	0	0	0	0	1	0	0
plk3	4	0	0	6	0	0	1	1	1	3	0	3	0	3	0	0	0	0	1	2	3	1	0	0	3	0	1	0	0	0	1	0	1	0	0	0	5	0	0	0	0	0	0	0	0	0	0	0	0
chchd1	1	0	0	0	0	0	0	0	0	0	0	0	0	0	0	0	0	0	2	0	1	0	0	1	0	0	0	0	1	0	1	0	0	0	1	0	0	0	0	0	1	0	0	0	0	0	5	0	1
id2	1	1	0	2	0	0	0	0	1	1	1	0	0	0	1	0	0	0	1	2	0	2	1	0	1	0	0	0	0	0	0	0	0	0	1	3	0	0	2	0	0	0	0	0	0	0	2	1	0
LOC108895533	1	2	0	0	0	1	0	0	1	2	1	0	0	0	0	0	0	2	2	0	0	1	2	1	1	0	0	1	0	0	2	0	1	0	2	0	0	1	1	0	2	1	0	0	0	0	5	0	0
LOC108875330	1	0	0	2	1	0	0	0	2	1	0	1	0	0	0	0	0	1	1	0	0	0	0	0	0	0	0	0	0	0	0	0	0	1	0	0	0	0	0	0	0	0	0	0	0	0	0	5	0
ndufa11	4	0	0	0	0	0	0	0	0	0	1	0	0	0	0	0	0	0	3	0	0	0	0	0	0	2	0	0	1	0	0	0	0	0	0	0	0	0	0	0	0	2	0	0	2	0	7	0	0
atp5g3	2	3	0	2	0	0	0	0	0	1	0	0	0	0	1	2	0	0	10	0	2	0	1	0	0	0	0	0	0	0	0	2	0	0	0	0	1	2	0	0	0	1	1	0	0	0	25	0	0
LOC108875011	1	0	0	0	0	0	0	0	0	0	0	0	0	0	0	1	0	0	2	0	0	0	0	0	0	0	1	0	0	1	0	0	0	0	0	0	0	0	0	0	0	0	0	0	0	0	0	4	0
gnas	0	0	0	2	0	0	1	0	2	0	0	0	0	0	0	1	0	0	2	0	0	0	1	0	0	0	0	0	0	0	0	1	0	0	0	0	0	0	0	0	0	0	0	0	0	0	0	4	0
rnaseh1	0	0	0	0	1	0	0	0	0	0	0	0	0	0	1	0	0	0	0	2	0	0	1	0	0	0	0	0	1	0	0	1	0	0	0	0	2	0	0	0	0	0	0	0	0	0	1	0	0
LOC108899210	2	1	0	1	0	0	0	3	0	0	0	0	0	0	0	1	0	0	2	0	0	1	0	1	0	0	0	0	1	0	1	0	0	2	0	0	0	0	0	0	0	1	1	1	0	0	3	0	1
LOC108902264	99	62	19	56		23	16	36	36		35	30	11	40	14	58	20	13	41	16	32	38	36	75	25		19	27	19	19	21	53	28	41	19	22	10		21	10	16	41	28		15	26	75		35
akirin1	2	0	0	1	1	0	0	0	0	0	1	0	2	0	1	0	0	1	0	0	0	0	0	1	0	0	1	0	0	0	0	0	0	0	0	0	1	0	0	0	0	0	0	0	0	0	3	0	0
LOC108876465	0	0	0	0	0	0	0	0	0	0	0	0	0	0	0	2	0	0	1	0	0	0	0	0	1	0	0	0	1	0	0	0	0	0	0	0	0	0	1	0	1	0	0	0	0	0	0	1	0
mrps24	0	0	0	2	0	0	0	0	0	0	1	0	0	0	0	0	0	0	1	0	0	0	0	2	0	0	0	0	0	1	0	0	0	1	0	0	0	0	0	0	0	0	0	0	0	0	7	0	0
surf6	2	0	0	0	0	0	0	0	0	0	0	0	0	0	0	3	0	2	0	0	0	1	0	0	0	0	0	0	0	0	0	0	0	0	0	0	0	0	0	1	0	0	0	0	0	1	0	0	0
drg1	0	0	0	3	0	0	0	1	0	1	0	0	0	0	0	1	0	0	3	0	0	0	0	0	1	0	1	0	1	0	0	0	0	0	0	0	0	0	0	0	0	0	0	0	0	0	0	5	0
LOC108887324	1	0	0	0	0	0	0	0	0	1	0	0	2	0	0	2	0	1	1	0	1	0	0	1	0	0	0	0	1	0	1	0	0	1	0	0	0	1	0	0	0	0	0	0	0	0	10	1	1
sod2	0	0	0	0	0	0	0	0	0	0	1	0	0	0	0	0	0	0	0	2	0	0	0	0	0	0	0	0	0	0	1	0	0	0	0	1	0	0	0	0	0	1	0	0	0	0	0	0	0
chtop	1	2	0	0	0	0	0	0	0	0	1	0	0	1	0	1	1	0	0	0	0	1	0	0	0	0	1	0	0	1	0	0	0	0	0	0	0	0	1	0	0	1	0	0	1	0	2	0	0
ung	0	0	0	0	0	0	0	0	0	1	0	0	1	0	0	0	0	1	0	4	0	0	0	0	0	0	0	0	0	0	0	0	1	0	1	0	0	0	0	0	4	0	0	0	0	1	0	0	0
LOC108889299	0	1	0	0	0	0	0	0	1	0	3	0	0	0	0	1	0	0	0	0	0	0	0	0	0	0	1	0	0	0	0	1	0	0	0	0	1	0	1	0	0	0	0	0	0	0	1	0	0
tspan31	1	0	0	1	0	0	0	0	0	1	0	1	1	0	0	2	0	1	0	0	0	0	0	0	0	0	0	0	0	0	0	1	0	0	0	0	0	0	0	0	0	0	0	0	0	0	0	0	0
ccdc86	7	0	0	1	0	1	1	0	1	0	0	1	0	0	0	2	0	4	1	0	0	0	1	0	0	1	0	0	0	0	0	0	0	0	0	0	0	0	0	0	0	1	0	0	0	1	5	1	0
LOC108877287	2	0	0	0	0	0	0	0	0	0	0	1	1	1	0	0	0	0	0	2	0	0	0	1	0	0	0	0	0	0	0	0	0	0	0	0	0	0	0	0	0	0	0	0	0	0	0	0	0
LOC108898063	48	24	9	27	16	7	7	9	13	17	8	10	7	9	5	23	7	5	14	9	13	14	9	22	6	13	3	6	7	7	9	13	7	23	18	10	8	20	6	6	9	16	8	7	12	5	44	15	9
LOC108898142	1	2	0	0	0	0	0	0	1	1	0	0	0	0	0	0	1	0	0	1	0	0	0	0	0	2	0	0	0	0	0	0	0	2	0	0	1	0	0	1	0	0	0	0	0	0	4	1	0
rrp9	1	1	0	0	1	0	0	0	0	0	0	0	0	0	0	0	0	0	0	1	0	1	0	0	0	0	1	0	0	0	0	0	0	0	0	0	0	0	0	0	0	0	0	0	1	1	0	0	1
LOC108901562	10	1	1	9	3	2	3	5	2	0	9	2	1	2	1	4	1	1	3	1	3	2	0	5	3	2	2	0	0	2	0	4	2	1	0	1	0	3	1	2	0	0	1	1	2	0	1	1	0
tceb3	1	0	0	0	0	0	1	0	0	0	0	0	0	2	0	2	0	0	0	0	0	0	1	1	1	0	0	0	0	0	0	0	0	0	0	0	0	0	0	0	0	0	0	0	0	0	0	0	0
LOC108897145	4	0	1	0	0	0	0	0	0	0	0	0	0	0	0	0	0	0	1	0	0	0	0	0	0	1	0	0	0	0	0	0	0	0	0	0	0	0	0	0	0	0	0	1	0	0	6	0	1
wdr43	2	0	0	0	0	0	0	2	1	0	0	0	0	0	1	0	0	2	0	0	0	0	0	0	0	0	0	0	0	0	2	1	0	0	0	0	2	0	0	1	0	0	0	0	1	0	0	0	0
cunh19orf43	1	0	0	0	0	0	0	0	0	0	0	0	0	0	0	0	0	0	0	0	0	0	2	1	0	0	0	0	0	0	0	0	0	2	0	0	0	0	0	0	0	2	0	0	0	0	8	0	0
cnot8	0	0	2	0	0	0	0	0	0	0	0	0	0	0	0	1	0	0	2	0	0	0	0	0	0	0	0	0	0	0	0	0	0	2	0	0	0	0	0	0	0	0	0	0	0	0	4	0	0
ctsa	1	1	0	1	0	1	0	2	0	1	1	0	0	0	0	0	0	0	1	0	0	0	0	1	1	1	0	0	0	0	0	0	0	0	0	0	0	1	0	0	0	0	0	0	0	1	2	1	2
mrpl52	1	0	0	0	0	0	0	3	0	0	0	0	0	0	0	1	0	1	0	1	0	1	0	0	0	0	0	0	0	0	0	1	0	0	0	1	0	1	0	0	0	0	0	0	1	0	5	0	0
poldip3	1	0	0	0	1	0	1	0	0	0	0	0	0	0	0	3	0	1	0	6	0	0	0	0	0	0	0	0	0	1	0	0	0	0	0	0	0	0	0	1	0	0	1	0	0	0	0	0	0
supt16h	0	0	0	0	0	0	0	0	0	0	0	0	0	0	0	2	0	0	0	4	0	0	0	0	0	0	0	0	1	0	0	0	0	0	0	0	0	0	0	0	0	0	1	0	1	0	0	0	0
LOC108903038	0	0	0	4	1	0	0	0	0	0	0	0	0	0	0	6	0	1	5	0	2	0	0	0	0	1	0	0	0	1	0	0	3	0	1	1	0	1	0	0	0	0	0	0	0	0	7	0	0
LOC108884283	0	0	0	0	0	0	0	2	0	1	0	0	0	0	0	1	0	0	0	1	0	0	0	0	0	0	0	0	0	0	0	2	0	0	0	0	0	1	0	0	3	1	0	1	0	0	0	0	0
set	3	3	2	0	0	0	3	0	2	0	0	1	0	0	0	2	1	1	1	3	1	1	2	0	2	1	0	0	1	0	0	0	0	0	0	0	2	0	0	0	0	0	1	1	0	0	1	0	2
ngdn	2	0	0	1	0	0	0	0	1	0	0	0	1	0	0	2	0	0	0	0	0	0	1	0	1	0	0	0	0	0	0	0	0	0	0	0	0	2	0	1	0	1	0	0	0	0	4	0	0
LOC108896488	2	0	2	0	0	0	0	1	0	0	0	0	0	0	0	0	1	0	2	0	0	0	0	0	0	1	0	0	0	0	0	1	0	0	0	0	0	0	0	0	0	1	0	0	0	0	1	0	0
pprc1	6	0	0	0	0	0	0	2	0	1	1	0	0	0	0	2	0	1	0	0	0	1	0	0	0	0	0	0	0	0	0	0	0	1	1	0	0	0	2	0	0	0	0	2	0	0	0	0	0
zar1	9	5	0	4	3	4	2	2	2	6	1	2	1	3	4	11	2	0	3	10	5	4	3	3	4	2	0	0	7	1	4	2	2	4	8	3	5	1	4	3	7	2	3	1	2	11	4	1	8
fabp1	35	16	10	16	13	5	5	10	14	11	10	5	8	15	9	16	8	6	17	8	17	13	8	4	11	7	10	2	8	5	6	12	6	14	11	15	4	3	17	4	6	7	11	10	8	9	16	38	8
LOC108878639	1	0	0	0	1	0	0	0	0	0	0	0	0	0	0	1	0	0	0	1	0	0	0	0	0	0	0	0	1	0	0	0	0	0	0	1	1	0	0	0	1	0	0	0	0	0	0	0	0
LOC108895040	0	0	0	1	0	0	0	0	1	0	1	0	0	0	0	3	1	1	1	0	0	0	1	0	0	1	0	0	0	1	0	0	0	0	0	0	1	2	0	0	0	1	0	0	0	2	7	0	1
LOC108888085	2	1	1	1	0	0	0	0	1	0	0	0	1	1	0	3	0	1	1	0	0	0	0	0	0	0	0	0	0	0	0	1	0	2	0	0	0	0	0	0	0	1	2	0	0	0	5	0	0
pam16	0	1	0	0	0	0	0	0	2	0	1	0	0	1	0	0	0	1	0	0	0	0	0	0	0	0	0	1	0	0	0	0	0	0	0	0	0	1	0	0	0	0	0	0	0	0	0	0	1
LOC108880527	2	0	1	0	0	1	0	0	0	0	0	0	0	0	0	0	0	0	0	4	0	1	0	0	0	1	0	0	0	0	0	0	0	0	0	0	0	0	0	0	0	0	0	0	0	0	0	0	0
LOC108888372	7	1	0	0	0	0	1	0	1	1	0	0	0	0	0	3	0	0	1	0	0	1	0	0	0	1	0	0	0	0	0	0	0	1	0	0	0	1	0	0	0	0	0	0	0	0	1	0	0
ppig	1	1	0	2	4	1	0	1	0	1	1	1	0	3	0	5	0	0	0	3	0	0	0	0	2	0	0	0	1	0	0	1	0	0	1	0	3	0	1	0	3	2	0	0	1	2	0	1	0
hmgxb4	0	0	0	1	1	0	0	0	0	0	0	0	0	1	0	4	0	0	0	0	0	1	0	0	0	0	0	0	0	0	0	1	0	0	0	0	0	0	0	0	0	0	0	1	0	1	2	6	0
spsb1	1	0	0	0	0	0	0	1	0	0	0	0	0	0	0	1	0	0	0	1	0	0	0	0	0	0	0	1	1	0	0	2	0	0	0	0	0	0	0	0	0	0	0	0	1	1	1	0	0
LOC108875206	1	0	0	0	0	0	0	1	0	1	0	1	0	1	0	1	0	2	1	0	0	0	0	0	0	0	0	0	0	0	0	0	0	0	0	0	0	0	0	0	0	0	0	0	1	0	0	1	0
naa50	4	0	0	0	0	0	0	0	3	3	1	0	0	0	2	1	1	3	2	1	0	0	1	1	0	0	0	0	0	0	0	0	0	0	0	0	0	0	0	1	0	0	0	0	0	0	4	0	0
LOC108882608	3	1	1	1	0	0	0	0	1	1	0	3	0	0	0	0	1	0	0	0	0	0	0	0	0	0	0	0	0	0	0	0	0	0	0	0	2	0	0	0	0	0	0	0	0	0	0	0	0
pfdn1	1	1	0	0	0	0	2	2	0	1	1	0	0	0	1	1	0	0	1	0	0	0	0	0	0	0	1	0	0	0	0	0	0	0	0	1	0	0	1	0	0	0	0	0	0	0	3	1	0
LOC108890986	1	0	0	0	0	0	0	0	0	0	0	0	0	0	0	2	0	0	5	0	0	0	0	1	0	0	0	0	0	0	0	0	0	0	1	0	0	0	0	0	0	0	0	0	0	0	1	0	1
LOC108893335	18	1	0	6	2	12	3	2	3	0	2	4	1	2	2	6	1	0	10	3	2	5	2	2	0	12	2	0	2	1	6	7	3	6	5	1	1	5	1	2	0	2	2	0	2	5	43	0	3
LOC108899440	0	0	0	0	0	0	0	0	1	0	0	1	1	0	0	0	0	0	0	0	0	0	0	0	0	0	0	0	0	0	0	1	0	0	0	0	0	0	0	0	0	0	0	0	0	0	0	0	0
LOC108890486	0	0	0	0	0	2	1	0	0	1	0	0	0	1	0	0	0	0	0	0	0	0	1	1	0	0	0	0	0	0	0	1	0	1	0	0	0	1	0	0	0	1	0	0	0	0	6	1	1
LOC108889923	28	20	2	16	13	4	7	8	12	22	8	13	6	9	7	18	9	2	7	4	8	9	14	22	11	15	9	9	4	8	6	18	6	10	5	6	2	14	11	6	6	11	7	8	8	6	16	10	6
rsl1d1	5	1	0	0	0	1	0	2	0	2	1	1	3	1	0	2	0	0	1	4	1	1	1	0	1	0	1	2	0	1	0	0	0	0	0	1	0	1	0	0	1	1	0	0	0	1	1	0	0
gmnn	21	11	4	10	7	4	2	7	12	10	8	10	3	9	7	12	9	2	9	2	3	5	5	6	5	1	11	3	7	6	5	12	3	7	8	10	6	4	21	2	3	8	9	5	7	7	14	23	6
farsa	2	0	1	1	0	0	0	1	0	1	0	0	0	1	1	3	0	0	1	0	0	1	0	0	0	0	0	1	0	0	3	1	0	1	0	0	0	0	0	0	0	0	0	0	0	1	1	7	0
LOC108902719	1	3	0	1	0	0	0	4	0	0	1	1	0	1	0	1	0	0	0	1	0	2	1	0	0	0	0	0	1	1	0	0	0	0	1	0	0	1	0	0	1	1	0	1	0	1	2	1	0
LOC108877419	0	0	0	0	0	0	0	3	0	0	0	0	0	0	0	0	0	1	0	1	0	0	0	0	1	0	0	0	1	0	0	0	0	0	0	0	0	0	1	0	1	0	1	0	1	0	0	0	0
ddx52	3	0	0	1	0	0	0	0	0	0	0	0	0	0	0	2	0	0	0	0	0	0	0	0	0	0	0	0	0	0	0	0	0	0	0	2	0	0	0	0	0	0	0	0	0	0	0	2	0
LOC108893634	0	0	0	2	0	0	0	1	0	1	0	0	0	0	0	0	0	1	1	0	0	0	0	0	0	0	0	0	0	0	0	0	0	0	0	0	0	0	1	0	0	0	0	0	1	0	0	0	0
LOC108872509	9	4	5	8	5	4	2	4	4	2	2	3	1	4	4	3	2	2	2	1	4	2	2	2	2	1	1	1	4	0	0	2	2	0	2	1	2	0	4	7	2	5	0	1	4	2	2	14	2
LOC108893336	2	2	1	4	0	5	0	1	3	1	1	3	1	0	0	5	1	1	0	0	2	0	0	7	1	4	0	0	1	1	0	0	0	0	1	1	0	1	0	0	0	1	2	1	1	1	13	1	2
atp5j	21	4	2	5	2	2	1	0	4	4	6	2	4	6	3	10	1	3	3	3	10	5	5	8	6	8	3	4	2	0	6	6	3	2	2	2	2	6	2	4	1	2	4	2	3	2	20	3	4
txndc9	0	0	0	0	1	1	0	0	0	0	0	0	0	0	0	0	0	0	0	0	0	0	0	0	1	0	0	1	1	0	0	0	0	0	0	0	0	0	0	0	0	0	0	0	0	0	0	0	0
ost4	0	0	0	0	0	0	1	0	1	0	0	0	0	0	0	1	0	0	1	0	0	0	0	1	0	3	0	0	0	0	0	1	0	1	0	0	0	2	0	1	0	1	0	0	0	0	8	0	0
ranbp1	3	0	1	1	0	3	0	0	0	0	0	0	0	1	0	2	0	0	0	2	0	0	1	0	0	1	0	0	0	0	1	0	1	0	0	0	0	1	1	0	1	0	1	0	0	0	0	0	1
LOC108890952	2	2	3	7	3	1	2	3	0	0	1	0	1	1	0	3	1	1	2	2	3	1	1	4	2	3	0	0	0	2	1	4	2	3	1	1	0	4	1	0	0	2	1	1	2	1	1	2	0
gpc2	0	1	0	1	0	1	0	2	0	2	1	0	0	0	0	0	0	2	1	0	0	0	0	0	0	0	0	0	1	0	0	0	0	0	0	0	0	0	0	1	0	0	0	0	1	0	0	1	0
LOC108881620	2	0	1	0	3	0	0	1	0	0	0	0	0	0	2	1	0	0	0	2	0	0	0	0	1	0	0	0	0	0	0	0	0	0	0	0	0	0	0	1	0	1	0	0	0	1	2	0	0
LOC108897163	1	0	1	1	0	0	1	0	0	1	1	0	0	1	1	0	0	0	1	0	0	3	0	0	0	0	1	1	0	2	0	0	0	0	0	0	0	0	0	1	1	0	1	0	1	1	0	0	0
LOC108879183	0	0	0	0	0	0	0	1	0	0	0	0	0	0	1	1	0	0	0	0	0	0	1	0	0	0	0	1	1	0	0	0	0	0	0	0	0	0	0	0	0	0	0	0	0	0	0	0	0
exosc4	0	0	2	0	0	0	1	0	1	0	0	0	0	0	0	0	0	2	1	1	0	0	0	1	0	0	0	0	0	0	0	1	0	0	0	1	0	0	0	0	0	0	0	0	0	0	0	1	0
dnajc2	1	0	0	0	2	0	0	0	0	1	0	0	0	0	0	3	0	0	1	0	1	1	0	0	0	0	0	0	0	0	1	0	0	0	0	0	0	0	0	0	1	0	0	0	0	0	0	5	0
rnf7	0	0	0	0	0	1	0	0	0	0	0	0	0	0	0	0	0	2	0	2	0	0	0	0	0	0	0	0	2	0	0	0	0	0	0	0	0	0	0	0	0	0	0	0	0	0	0	0	0
timm9	1	0	0	0	0	0	0	0	0	1	0	3	1	0	0	0	0	1	0	1	0	0	0	0	1	1	0	0	0	0	0	0	0	0	0	0	0	0	0	0	0	0	0	0	0	0	0	0	0
snrpb	3	1	0	0	1	0	1	0	1	1	0	0	1	0	0	1	0	0	0	0	0	0	0	0	1	0	0	1	2	0	0	0	0	0	0	0	1	0	0	0	1	0	0	0	0	1	1	0	1
LOC108874910	3	0	0	1	1	0	0	0	0	0	0	2	0	0	1	0	0	1	0	0	2	0	0	0	0	0	0	0	1	0	1	0	0	0	0	3	0	0	1	0	0	0	0	0	0	1	0	1	0
LOC108876744	1	0	0	0	0	0	0	0	2	0	0	0	0	0	0	0	0	0	2	0	0	0	0	0	1	0	0	0	0	1	0	0	0	0	0	0	0	0	0	0	0	0	0	0	0	0	0	8	0
denr	1	0	0	1	0	0	1	0	0	0	0	2	0	0	0	2	0	0	0	0	0	0	1	0	0	0	0	0	0	0	0	1	0	0	0	0	0	0	0	0	0	0	0	0	0	1	0	8	0
thoc7	0	0	0	0	0	0	0	0	0	0	0	0	0	1	1	1	0	0	0	1	0	0	1	0	0	0	0	0	0	0	0	3	0	0	0	0	0	0	0	0	0	1	0	0	0	0	0	0	0
mrpl1	0	0	1	0	0	0	0	1	0	3	2	0	0	0	0	0	0	0	0	0	0	0	1	0	0	0	0	0	0	0	0	0	0	0	0	0	0	0	0	0	1	0	0	0	0	0	2	0	2
ppme1	0	1	0	0	0	0	0	0	0	2	0	1	0	0	0	0	0	0	0	0	0	0	0	0	0	0	0	0	0	0	1	0	0	1	0	0	0	0	0	0	0	0	0	0	0	0	0	0	0
rpf2	0	0	0	0	0	0	0	0	0	0	0	0	0	0	0	1	0	0	0	1	0	0	0	0	1	0	0	0	0	0	0	0	0	0	0	1	0	0	0	0	0	0	0	0	0	0	0	0	0
LOC108875185	1	1	0	2	1	0	0	0	0	0	0	0	0	0	0	0	0	0	1	0	0	0	0	0	0	0	1	0	0	0	0	0	0	1	0	0	0	0	1	0	0	0	0	0	0	0	0	4	0
ifrd1	3	0	0	0	0	0	0	0	0	2	0	0	0	0	0	2	0	0	2	0	0	0	0	0	1	0	1	0	0	0	0	1	0	0	0	0	0	0	1	0	1	0	0	0	0	0	0	1	0
LOC108892045	12	11	2	5	0	3	2	3	3	7	3	4	0	1	4	8	7	1	9	3	4	10	3	1	2	4	2	5	2	4	2	7	1	8	0	3	3	7	1	2	3	6	3	1	4	2	14	9	2
LOC108876687	0	0	1	1	0	0	1	0	0	0	0	0	0	0	1	0	0	0	0	0	1	0	0	0	1	1	1	0	0	0	0	0	0	0	0	2	0	0	1	0	0	1	1	2	0	0	1	1	0
siva1	0	0	0	1	0	0	0	0	1	0	0	1	1	0	0	2	0	0	0	0	0	0	0	0	1	0	0	0	0	0	0	0	0	0	0	0	1	2	0	1	0	0	0	0	0	0	0	0	0
mrpl55	1	0	0	1	0	0	0	0	0	0	0	1	0	1	0	0	0	0	0	0	0	0	0	0	0	0	0	0	0	0	0	1	0	0	0	0	0	1	0	0	0	0	1	0	0	0	7	0	1
bud31	0	0	0	0	0	0	0	0	0	1	0	0	0	0	0	0	0	0	0	0	0	1	0	0	0	1	0	0	0	0	0	0	0	1	0	0	0	0	0	0	1	0	0	0	0	0	0	1	0
LOC108891918	2	0	0	1	0	0	0	0	1	1	0	0	0	0	2	1	0	0	0	0	1	0	0	0	0	1	0	0	0	0	0	1	0	0	1	0	0	0	0	0	0	0	0	0	0	0	10	0	1
mtif3	1	1	0	0	0	0	0	2	0	0	1	0	1	1	1	0	0	0	0	1	0	0	0	0	0	0	0	0	0	0	0	0	1	0	0	0	0	1	0	1	0	0	0	0	1	0	2	0	0
LOC108892187	0	0	0	0	0	0	0	0	0	0	0	0	0	0	0	2	0	0	0	0	0	1	0	0	0	0	1	0	0	0	0	0	0	0	0	1	0	0	0	0	0	1	0	0	0	0	0	1	0
abcf2	0	0	0	2	1	0	0	0	0	1	0	0	0	0	0	0	1	0	0	0	0	0	0	2	0	0	0	0	0	0	0	0	0	0	0	1	0	1	0	0	0	0	0	0	1	0	4	0	0
snapc3	0	2	0	1	0	0	0	0	1	1	0	0	0	0	0	1	0	0	0	0	0	0	0	0	0	0	0	0	0	1	0	0	0	0	0	0	0	0	0	0	0	0	0	0	1	0	0	0	0
ssna1	0	0	0	1	0	0	0	0	0	0	0	0	0	0	0	0	0	0	0	0	0	0	0	0	0	0	0	0	1	0	0	0	0	1	0	0	0	0	0	0	0	1	0	0	0	0	0	0	0
mrpl53	2	0	0	0	0	0	0	1	0	0	0	0	0	0	0	0	0	0	1	0	0	1	0	0	0	1	0	0	1	1	0	0	0	1	0	0	0	2	0	0	0	1	1	0	0	0	3	0	0
LOC108893807	29	18	9	12	8	6	4	11	17	15	4	8	4	7	3	24	3	1	12	3	10	16	8	7	5	8	5	3	5	4	9	13	9	15	6	4	4	13	6	2	5	8	7	6	7	8	23	10	9
LOC108890462	2	1	0	1	2	0	0	0	0	0	0	0	0	0	1	0	0	0	0	0	0	0	2	0	1	0	0	1	0	1	0	1	0	1	1	2	0	3	0	0	0	0	3	0	0	0	1	2	0
LOC108887834	1	0	1	0	0	1	0	0	3	0	0	0	0	0	0	0	0	0	3	0	0	0	0	0	0	0	0	0	0	0	0	0	0	0	0	0	0	1	0	0	0	0	0	0	0	0	4	1	0
LOC108902262	35	27	6	13	9	14	7	16	12	18	12	17	6	18	8	24	10	1	11	5	10	8	16	26	12	27	6	6	6	6	6	31	14	10	13	9	5	21	12	3	9	17	15	4	8	6	12	9	12
LOC108897253	1	0	0	0	0	0	0	0	0	0	0	0	0	0	0	0	0	0	0	0	0	0	0	0	1	0	0	1	0	0	0	0	0	0	0	0	0	0	0	0	0	0	0	0	0	0	3	0	0
fen1	0	0	0	1	0	0	0	1	0	1	0	0	0	0	0	0	0	0	0	0	1	0	0	0	0	0	1	1	0	0	0	0	0	0	0	0	0	0	1	0	0	0	1	0	0	0	0	2	1
gtf2a1	1	0	0	2	0	0	0	0	0	0	0	0	0	0	0	1	0	0	1	0	0	0	0	0	0	0	0	0	0	0	0	0	0	2	0	0	0	0	0	0	0	0	0	0	0	0	0	4	0
LOC108876269	0	1	1	0	0	0	1	0	0	0	5	0	0	0	0	1	0	1	2	0	0	2	0	0	0	0	0	0	0	0	1	1	0	0	0	0	1	0	0	0	0	0	0	0	2	1	0	2	0
LOC108880713	1	0	0	0	0	0	0	0	0	0	0	0	0	0	1	0	0	0	0	4	0	0	0	0	1	0	0	0	0	0	0	0	0	0	0	0	0	1	0	0	0	0	0	0	2	0	0	1	0
LOC108897136	0	0	1	0	0	0	0	0	0	0	1	0	0	0	1	0	0	0	2	0	0	0	0	0	0	0	0	0	0	0	0	0	0	1	0	0	1	1	0	0	0	0	0	0	0	0	6	0	0
LOC108902477	2	1	0	0	0	1	0	0	0	0	0	2	0	1	0	3	0	0	0	0	1	0	0	1	1	0	0	0	0	0	0	0	1	0	0	1	0	1	1	0	1	0	2	1	0	0	12	0	2
LOC108901614	9	4	3	11	2	5	2	6	14	5	3	2	0	6	3	12	6	3	5	2	4	7	5	5	2	8	2	7	2	4	3	10	4	8	5	4	3	5	2	2	3	2	2	2	3	2	12	5	3
necap2	2	1	0	1	0	0	0	0	1	2	0	0	0	0	0	1	1	0	0	0	0	0	0	0	0	0	0	0	0	0	0	0	0	0	0	0	0	0	0	0	0	0	0	1	0	0	1	0	0
tceb2	0	0	2	2	0	1	0	0	0	2	0	0	0	0	0	1	0	0	0	3	1	0	0	0	0	0	0	0	1	0	0	0	0	0	0	0	0	0	0	0	0	0	0	1	0	0	0	0	1
gnl3	1	0	1	0	0	0	0	0	0	0	0	0	0	0	0	2	0	0	1	0	0	0	0	0	1	0	0	0	0	0	0	0	0	0	0	0	0	0	0	0	0	0	0	0	0	0	0	1	0
LOC108887577	18	7	4	9	5	5	1	6	4	6	4	4	1	8	2	17	6	1	12	4	3	12	4	11	3	8	1	1	5	4	1	5	8	10	5	5	4	8	1	4	1	6	1	5	4	5	22	5	3
LOC108876036	1	0	1	0	0	0	2	0	1	0	2	0	0	1	0	1	0	0	0	0	0	1	0	0	0	0	0	0	0	0	0	0	0	0	0	1	0	0	0	0	0	0	0	0	0	0	0	3	0
LOC108895977	1	0	0	0	0	0	0	1	2	0	4	0	0	0	1	0	0	0	1	2	1	5	2	0	0	3	0	0	0	0	0	2	0	3	1	0	0	1	1	0	0	1	0	0	0	0	5	0	2
LOC108898647	8	3	0	3	0	0	0	1	0	0	1	1	0	0	0	2	0	0	6	0	0	0	0	0	1	1	1	1	0	0	1	0	0	1	0	1	0	0	0	0	0	0	0	2	0	0	8	1	0
LOC108888694	1	0	0	0	1	0	0	0	0	0	1	0	0	1	0	2	0	1	4	0	0	0	0	0	0	0	0	0	0	0	0	0	0	2	0	0	0	0	0	0	0	0	0	0	0	0	6	0	0
LOC108878564	0	0	0	0	0	0	0	0	0	0	0	0	0	1	0	1	0	1	0	1	0	0	0	0	0	0	0	0	0	0	0	0	0	0	0	0	1	0	0	0	0	0	0	0	2	0	0	0	0
LOC108876656	9	4	2	5	2	2	3	0	1	2	6	1	4	6	1	8	2	2	5	7	1	4	3	3	2	3	2	2	2	0	7	1	3	2	1	9	0	0	3	4	0	7	2	1	4	1	3	3	3
hmgb2	2	3	0	1	0	2	2	4	1	1	0	1	0	0	1	1	1	0	3	0	2	0	1	1	1	0	0	1	0	2	0	0	0	0	0	1	1	0	2	1	0	2	0	0	0	1	0	6	5
dctn4	3	1	0	0	1	0	0	0	0	0	1	1	0	0	0	1	0	0	2	0	1	0	0	0	0	0	1	0	0	1	0	0	0	0	0	0	0	0	0	0	0	2	0	0	0	1	3	0	0
LOC108876473	3	1	3	1	1	2	1	1	2	1	3	1	1	0	0	3	0	0	5	0	4	1	2	0	2	0	1	0	0	1	1	0	0	1	0	1	1	0	3	2	0	1	0	1	1	0	1	1	3
arhgap11b	0	0	0	2	0	0	0	0	1	0	0	0	1	1	0	0	0	0	0	0	0	1	0	0	0	1	0	0	0	0	0	0	0	0	0	0	0	0	0	0	1	0	0	0	1	0	0	0	1
LOC108893236	1	0	0	0	2	0	0	0	0	0	1	0	0	0	0	1	0	0	0	0	0	0	1	0	0	0	0	0	0	0	0	0	0	1	0	0	0	0	0	0	1	0	0	1	0	0	0	0	0
LOC108890616	2	0	0	0	0	0	0	0	0	0	0	0	0	2	0	0	1	0	0	0	0	0	0	1	0	0	1	0	0	0	0	0	0	1	0	0	0	0	0	0	1	0	0	0	0	0	2	0	0
rnps1	1	0	0	1	0	0	0	0	0	1	0	1	0	0	0	0	0	0	0	3	0	0	0	0	0	0	0	0	0	0	0	0	1	0	0	0	0	0	0	0	1	0	0	1	0	0	0	0	0
ss18l2	0	0	0	1	0	0	0	0	0	0	0	1	0	0	0	0	0	0	0	0	0	0	0	1	0	0	0	0	0	0	0	0	0	0	0	0	2	0	0	0	0	1	0	0	0	0	0	0	1
acp5	17	7	2	15	4	3	1	3	14	12	10	6	4	12	2	11	7	3	6	6	11	5	4	9	1	7	2	5	3	5	7	7	3	10	3	2	1	10	1	2	2	7	10	5	4	8	16	6	6
polr2i	0	0	0	1	0	0	0	0	0	0	0	0	0	0	0	1	0	0	0	0	0	0	0	0	0	0	0	0	0	0	0	1	0	0	1	0	1	0	0	0	0	0	0	0	0	0	0	0	0
pabpn1l	0	1	1	1	0	1	0	1	1	0	0	1	0	3	0	2	1	0	1	0	1	1	1	1	0	0	2	0	0	0	0	1	0	1	0	0	0	0	0	0	1	1	0	0	0	2	4	0	0
LOC108892980	0	1	0	1	0	1	0	0	0	1	0	0	1	0	0	0	0	0	1	0	0	0	0	0	0	0	0	0	0	0	0	1	0	0	0	0	0	2	2	0	0	0	0	1	0	1	10	0	2
tmem255b	0	0	0	1	0	0	0	0	0	0	1	0	1	0	0	1	0	1	0	2	0	1	0	1	0	0	1	0	0	0	0	0	0	0	0	1	0	0	0	1	2	1	0	0	0	0	0	0	0
LOC108895042	5	2	0	1	0	0	0	0	0	0	0	0	0	0	0	2	0	0	1	0	0	0	1	0	0	0	0	0	0	0	0	1	0	0	0	0	0	1	0	0	0	0	0	0	0	0	4	0	1
LOC108893242	0	1	0	1	0	0	0	0	0	0	0	0	0	0	0	1	0	0	0	0	0	0	0	0	0	0	0	0	0	0	0	0	0	1	0	0	0	0	0	0	0	2	0	0	0	0	0	0	0
vmo1	0	0	0	2	0	0	1	0	0	0	0	0	0	0	0	0	0	0	0	0	0	0	1	0	1	0	0	0	0	0	1	0	0	0	0	0	0	0	0	0	0	0	0	0	0	0	0	0	1
LOC108872494	2	1	1	0	0	2	0	0	1	3	1	0	0	1	0	0	0	0	2	1	1	3	2	0	2	0	0	0	2	2	0	1	0	0	0	0	2	2	2	1	0	1	1	0	0	0	2	2	0
zar1l	1	0	4	0	1	0	0	1	1	2	0	0	0	1	0	1	0	0	1	0	1	0	0	1	0	0	0	0	2	0	0	0	2	2	0	1	0	1	1	0	0	1	0	1	0	1	6	0	5
rtca	0	0	0	1	1	0	0	1	0	0	0	0	0	0	0	0	1	1	0	3	0	0	0	0	0	0	0	0	0	0	0	0	0	1	0	0	0	0	0	0	0	0	0	0	0	0	0	0	0
imp4	0	0	0	1	0	0	0	0	0	0	0	0	0	0	0	1	0	0	1	0	0	0	0	0	0	0	0	0	0	0	0	0	0	0	0	1	0	0	0	0	0	0	0	0	0	0	0	2	0
nasp	6	7	1	3	0	0	0	2	2	5	0	3	1	0	0	4	3	3	6	2	0	5	5	1	0	4	1	0	0	2	1	6	0	5	2	4	1	2	1	2	4	3	4	0	1	4	7	0	2
LOC108881522	0	0	0	1	0	0	0	0	0	0	0	0	0	0	0	1	0	0	0	0	0	0	1	1	0	0	0	0	0	0	0	0	0	0	1	0	0	0	0	0	0	1	0	0	0	0	0	0	0
LOC108894280	2	0	1	0	0	0	0	0	1	0	0	0	0	1	1	0	0	0	0	0	0	3	0	0	0	0	0	0	0	0	0	2	1	0	0	0	0	0	0	0	0	1	0	0	0	0	5	0	0
LOC108890227	1	1	0	0	0	0	0	0	1	0	0	0	0	0	0	2	0	0	1	0	0	0	0	0	0	0	0	0	0	0	0	0	0	0	0	0	0	0	0	0	0	0	0	1	0	0	2	0	0
LOC108900816	29	15	8	12	6	9	6	10	11	8	9	11	5	11	9	18	8	4	7	5	12	5	4	24	7	14	5	9	10	8	10	12	13	13	6	6	9	33	5	9	3	16	7	6	8	12	19	13	8
apopt1	1	2	0	0	0	0	0	0	0	0	0	0	0	1	0	1	0	1	2	0	0	0	0	0	0	0	0	0	0	1	0	0	0	0	0	0	0	0	0	0	0	0	0	0	0	0	0	0	0
fabp3	2	0	1	1	0	0	0	0	0	0	0	0	0	0	0	0	0	0	2	0	0	0	1	0	0	0	0	0	0	0	0	1	0	0	0	1	0	0	0	0	0	0	0	0	0	0	0	1	0
haus6	0	0	0	1	0	0	0	1	0	0	0	0	0	0	0	0	0	0	0	0	0	0	0	0	0	1	0	0	0	0	0	0	0	0	0	0	1	0	1	0	0	0	0	0	0	0	0	0	0
asap2	0	0	0	0	0	0	0	0	0	0	0	0	0	0	0	1	0	0	0	0	0	1	0	1	0	1	0	0	0	0	0	1	0	0	0	0	0	0	0	0	0	0	0	0	0	0	0	0	0
cd2bp2	1	0	0	0	0	0	0	0	0	0	0	0	0	0	0	0	0	0	1	0	0	0	0	1	0	0	0	0	0	0	0	0	0	0	0	0	0	0	0	0	0	0	0	0	0	0	4	0	0
mcm4	0	0	0	0	0	0	0	0	0	0	0	0	0	1	0	3	0	0	2	0	0	0	1	0	0	0	0	1	0	1	0	0	0	0	1	0	0	1	0	0	0	0	0	0	0	0	2	1	2
prpf40a	0	1	0	0	0	0	0	0	0	2	0	0	0	0	0	0	0	0	0	1	0	0	0	0	0	0	0	0	0	0	0	0	0	0	0	0	0	0	0	1	0	0	0	0	0	0	0	0	0
lsm12	2	2	0	0	0	0	0	0	0	0	0	0	1	0	1	1	0	2	1	0	1	0	0	0	0	0	0	1	0	0	0	0	0	1	0	1	0	0	1	0	0	0	0	0	2	0	14	0	0
LOC108890906	1	3	0	1	0	2	0	0	0	1	0	0	0	0	0	1	1	0	2	0	0	1	0	0	0	0	0	0	0	0	0	0	0	0	0	0	0	1	0	0	0	0	0	0	0	0	6	0	0
uhrf1	0	0	0	0	0	0	0	1	0	0	0	0	0	0	0	0	0	0	0	1	0	0	0	0	1	0	0	0	0	0	0	0	0	0	0	0	0	1	0	0	0	0	0	0	1	0	0	0	0
LOC108900292	1	0	0	0	2	0	0	0	0	0	0	1	0	1	0	1	0	0	0	0	0	0	1	0	0	1	0	0	1	0	1	1	0	2	0	0	0	2	0	0	1	1	0	1	1	0	2	1	0
LOC108873767	0	0	0	0	0	1	0	0	0	0	0	0	0	2	0	1	0	0	1	0	0	1	0	0	0	0	0	0	0	0	0	0	0	0	0	2	0	0	0	0	0	0	0	0	0	0	0	2	0
cdk1	1	1	0	0	0	1	0	0	0	0	0	0	0	0	0	1	0	0	0	0	1	0	0	0	0	0	1	0	0	0	0	0	1	1	0	0	0	0	1	0	0	1	1	0	0	0	1	0	0
LOC108873151	0	0	0	0	0	0	0	0	0	1	0	0	0	0	0	0	0	1	1	0	0	0	0	0	1	0	0	0	0	0	1	0	1	0	0	0	0	0	0	0	0	0	0	0	0	0	0	1	1
ybx2	2	0	0	2	0	1	0	1	1	0	0	1	0	0	0	0	0	0	0	8	1	0	0	0	0	2	1	0	0	0	1	0	0	0	0	0	1	0	0	0	0	0	0	0	0	0	0	0	0
LOC108875951	5	0	0	0	0	0	0	0	0	0	0	0	0	0	0	0	0	0	1	0	0	0	0	0	0	0	0	0	1	0	0	1	0	0	0	0	0	0	0	1	0	0	0	0	0	0	0	1	0
LOC108894246	14	5	1	1	6	2	0	2	3	4	0	3	2	3	1	5	3	0	0	3	3	3	4	3	3	3	0	0	6	0	2	5	4	3	1	2	1	7	1	2	1	4	1	1	1	4	4	3	1
dctn2	1	2	0	0	0	0	0	0	1	1	0	1	0	0	0	0	0	0	0	0	0	0	0	0	0	1	0	0	0	0	1	0	0	0	0	0	0	0	0	0	0	0	0	0	0	0	2	0	0
LOC108900304	7	6	0	4	1	1	0	1	1	2	2	1	1	3	2	9	3	3	4	0	2	4	1	2	0	3	1	3	2	2	0	1	2	1	0	4	1	0	1	0	1	2	0	1	0	2	11	1	1
LOC108896123	17	11	3	9	8	9	3	6	10	9	9	7	1	3	1	17	11	5	7	3	5	5	6	12	6	9	3	5	3	4	6	6	7	11	4	5	3	10	1	7	4	6	5	7	4	6	25	7	4
LOC108877054	2	1	0	0	0	0	0	1	0	0	0	0	0	0	0	1	0	0	0	0	0	0	0	0	0	0	0	0	0	0	0	0	0	0	0	0	0	0	0	1	0	0	1	0	0	0	0	0	0
LOC108886053	1	0	0	0	0	0	0	0	0	0	0	0	0	0	0	0	0	0	0	1	0	0	0	0	0	0	0	0	1	1	0	0	0	0	0	0	0	0	0	0	1	0	0	0	0	0	0	0	0
tbpl2	0	1	0	0	1	0	1	0	1	0	0	0	0	0	0	0	0	0	0	2	0	0	0	0	0	0	0	0	0	0	1	0	0	0	0	0	0	0	0	1	0	0	0	0	0	0	0	0	0
nek2	0	0	0	0	0	0	0	0	0	0	0	0	1	0	0	0	0	0	1	0	0	0	0	1	1	0	0	0	0	0	0	0	0	0	0	0	1	0	0	1	0	1	1	0	0	0	2	0	0
LOC108894316	5	5	1	2	1	1	0	2	1	2	1	2	1	3	0	4	1	0	1	0	1	0	3	1	2	3	0	0	2	0	0	4	2	2	2	3	0	3	2	1	0	2	0	0	0	2	4	2	1
wrb	0	0	0	0	0	0	0	1	0	0	0	0	0	0	0	0	0	0	0	1	0	0	1	0	0	0	0	0	0	0	0	1	1	0	0	0	0	0	0	0	1	0	0	0	0	0	0	0	0
katnbl1	0	1	1	1	0	0	0	0	1	0	0	0	0	0	0	0	0	0	0	0	1	0	0	0	0	1	0	0	0	0	0	0	0	0	0	0	0	0	0	0	1	0	0	0	0	0	0	0	0
LOC108895413	0	1	1	2	3	2	1	0	1	2	0	0	0	1	1	0	3	1	1	0	0	3	0	1	2	2	0	0	2	0	1	3	2	3	0	0	2	1	0	0	1	3	1	0	1	1	3	1	1
dnajc9	0	0	0	0	0	0	0	0	0	1	0	0	0	1	1	1	0	0	2	0	2	1	0	1	1	0	0	0	0	0	0	1	0	0	0	0	0	0	3	0	0	0	0	0	0	0	0	7	0
LOC108881400	0	0	0	0	0	1	0	0	0	0	0	1	0	0	0	0	0	0	0	1	0	1	0	0	1	0	0	0	0	1	0	0	0	0	0	1	0	0	0	0	0	0	0	0	0	0	1	0	1
LOC108873022	1	0	0	0	0	0	0	0	0	0	0	0	0	2	0	1	0	0	1	0	0	0	0	0	0	0	0	0	0	0	0	0	0	0	0	3	0	0	0	0	0	0	0	0	0	0	0	2	0
LOC108876786	1	0	0	1	0	0	0	0	0	1	0	0	0	0	0	0	0	0	1	0	0	0	0	0	0	1	0	0	0	1	0	0	0	0	0	0	0	0	1	0	0	1	0	0	0	0	0	1	0
LOC108883962	0	0	0	0	0	0	0	0	0	0	0	0	0	0	0	0	0	0	0	0	0	1	0	0	0	0	0	0	0	0	0	0	0	0	0	1	1	0	0	0	0	0	0	1	0	0	0	0	0
LOC108895022	2	1	0	0	2	1	2	0	0	3	4	1	0	3	1	1	1	0	2	1	1	0	1	1	0	1	1	1	0	0	2	0	0	2	0	1	0	0	3	0	1	1	0	0	0	1	3	1	0
LOC108896483	0	0	0	1	1	0	0	0	0	0	1	0	0	0	0	0	0	0	0	0	0	0	0	0	0	0	1	0	0	0	0	0	0	0	0	0	0	0	0	0	0	1	0	0	0	0	0	0	0
snrpd3	1	1	0	0	0	0	0	0	1	0	0	0	0	0	0	2	0	1	0	2	1	0	0	0	1	0	0	0	4	0	0	0	1	0	0	0	0	0	0	0	0	0	0	0	0	0	0	0	0
ssb	0	0	0	0	0	0	0	0	0	0	0	0	0	0	0	2	0	0	0	1	1	0	0	0	0	0	0	0	1	0	0	0	0	0	0	0	0	0	1	0	1	0	0	0	0	0	0	0	0
tfdp1	1	0	0	1	0	0	0	0	0	0	0	0	0	0	0	1	1	0	3	0	0	0	0	0	0	1	0	0	0	1	0	0	0	0	0	0	0	1	0	0	2	0	0	0	0	0	0	0	0
LOC108873634	1	0	0	1	0	0	0	0	0	0	0	0	0	0	0	0	0	0	0	0	1	1	0	0	1	0	0	0	0	0	0	0	0	0	0	1	0	0	0	0	0	0	0	0	0	0	0	0	0
LOC108880441	1	1	0	1	0	0	0	0	0	1	1	0	0	0	0	1	0	0	0	1	0	0	0	0	0	0	0	0	0	0	0	0	0	0	0	1	0	0	0	0	0	1	0	1	0	0	0	0	0
LOC108875614	4	1	0	1	2	1	0	0	1	1	1	0	2	1	0	1	0	0	2	1	1	0	1	1	1	0	3	0	0	1	0	0	0	0	0	1	0	0	2	1	0	0	0	0	0	1	0	4	0
LOC108898026	9	10	0	6	7	3	1	2	2	1	2	2	2	3	5	7	3	3	8	4	1	6	1	3	2	5	3	1	2	2	4	1	1	5	3	2	1	7	2	4	2	5	4	2	3	5	10	5	1
LOC108873608	0	0	0	0	0	0	1	0	0	0	0	1	0	1	0	0	0	0	0	0	0	0	0	0	0	0	0	0	0	0	0	0	0	0	1	0	0	0	0	1	0	0	0	1	0	0	0	0	1
LOC108895209	5	0	0	2	0	1	0	0	0	1	2	0	0	0	0	4	1	0	2	0	0	0	3	0	1	2	0	0	2	0	0	2	1	0	0	0	0	0	0	0	0	0	0	1	1	0	5	0	1
LOC108873463	0	0	0	0	0	1	0	0	0	0	2	0	0	0	0	1	0	0	0	0	0	0	0	0	0	0	0	0	0	0	0	0	0	0	0	2	0	0	0	0	0	0	0	0	0	0	0	0	0
gpkow	0	1	0	1	0	0	0	0	0	0	0	0	0	0	0	0	1	0	2	0	0	0	0	0	0	0	0	0	1	0	0	0	0	0	0	0	2	0	0	0	0	0	0	0	0	0	0	2	0
vdac2	1	0	0	2	1	0	0	1	0	0	0	0	0	0	0	0	0	0	0	1	0	1	0	0	0	0	0	0	0	1	0	0	0	0	0	0	0	0	0	0	0	0	0	0	0	0	0	0	0
cdca3	1	1	0	0	0	0	0	1	0	0	0	2	0	0	0	2	0	0	0	0	0	0	0	0	0	0	1	0	0	0	0	0	0	0	0	0	1	0	1	0	0	2	1	1	0	0	2	1	0
bub3	1	0	0	0	0	0	0	0	1	0	0	0	0	0	0	0	0	0	0	0	0	0	1	0	0	1	0	0	0	1	0	0	0	0	0	0	0	0	0	0	0	0	0	0	0	0	1	1	0
LOC108874599	0	0	0	0	0	0	0	0	2	0	0	1	0	0	0	0	0	0	0	0	0	0	0	0	0	0	0	0	0	0	0	0	0	1	0	0	0	0	1	0	0	1	0	0	0	0	0	1	0
dut	2	0	0	1	0	1	0	1	2	0	1	0	0	0	0	0	0	0	1	0	0	0	0	0	0	1	0	3	0	0	1	2	0	0	0	2	0	0	2	0	0	0	0	0	1	2	0	0	0
LOC108897388	0	0	0	1	0	1	2	0	0	1	0	1	0	0	0	1	0	0	0	0	0	1	0	0	1	0	0	0	1	0	0	0	0	0	0	0	0	0	0	0	0	0	0	0	0	0	0	0	0
LOC108873107	0	0	0	0	0	0	0	0	0	0	0	0	0	0	0	0	0	0	0	0	0	0	0	0	0	0	1	1	0	0	1	0	0	0	0	0	0	0	0	1	0	0	0	0	0	0	0	0	0
wnt16	1	0	0	0	0	0	0	0	0	0	1	0	0	0	0	1	0	0	0	0	0	2	0	0	0	0	1	0	0	0	0	0	0	0	0	0	0	0	0	0	1	0	0	0	0	0	1	0	0
LOC108900344	2	2	0	0	0	2	0	1	0	1	1	0	0	2	0	1	1	0	1	0	0	0	0	2	0	0	0	0	3	0	0	2	1	0	1	2	0	1	1	0	0	1	0	0	0	0	3	0	0
kif22	0	0	0	0	2	1	0	0	0	2	0	0	1	0	1	1	0	0	0	0	4	0	0	0	0	0	0	0	0	1	0	0	0	0	0	0	0	0	0	0	0	1	0	0	0	1	0	0	0
pcgf6	1	1	0	0	0	0	0	1	1	2	0	1	1	0	1	3	0	0	0	0	0	1	0	0	1	1	0	0	1	0	0	1	0	1	0	0	0	0	0	0	0	0	0	0	0	0	2	0	2
tomm22	1	0	0	0	1	0	3	0	0	0	0	0	0	1	0	0	0	0	0	0	0	0	0	0	0	0	0	0	2	0	0	0	0	0	0	0	0	0	0	0	0	0	0	0	0	0	0	0	0
LOC108878140	1	2	1	0	0	0	0	0	3	0	0	0	0	0	0	0	0	0	0	0	0	1	0	0	0	0	0	0	0	0	0	0	0	0	0	0	1	0	0	0	0	0	0	0	0	2	0	0	0
LOC108900274	9	8	1	5	3	0	2	0	5	5	0	1	1	3	1	3	2	0	2	0	1	6	3	3	2	1	1	0	0	4	1	4	1	2	0	0	1	4	1	0	1	4	3	2	0	2	4	6	5
LOC108878904	0	0	0	0	0	0	0	0	0	0	0	0	0	0	0	1	0	0	1	0	0	1	0	0	0	0	0	0	0	0	0	0	0	0	0	0	0	0	0	1	0	1	0	0	0	0	0	0	0
ube2b	0	0	0	0	0	0	0	0	0	0	0	0	0	1	1	0	0	0	0	1	0	0	0	0	0	0	0	0	0	0	0	0	0	0	0	0	0	0	0	0	1	0	0	0	0	0	0	0	0
LOC108879823	0	0	0	0	0	0	0	0	0	0	0	0	0	0	0	0	0	0	0	3	0	0	0	0	0	0	0	0	1	0	0	2	0	0	0	0	0	0	0	0	0	0	0	0	0	0	0	0	0
akip1	0	0	0	0	0	0	0	0	0	1	0	0	0	0	0	0	0	0	1	0	0	0	0	0	1	1	0	0	0	0	0	0	0	0	0	0	0	0	1	0	0	0	0	0	0	0	0	1	0
LOC108876087	0	0	0	1	0	0	0	0	1	0	0	0	0	0	1	1	0	0	0	0	0	0	0	0	0	0	0	0	0	0	0	0	0	0	0	0	0	0	1	0	0	0	0	0	0	0	0	0	0
LOC108893021	0	1	0	0	1	1	0	0	0	0	0	0	0	1	1	2	0	0	1	0	0	1	1	0	2	0	0	0	0	0	1	0	0	0	0	0	0	1	0	1	0	0	0	0	0	0	4	0	0
ccna2	4	2	1	4	0	2	3	1	1	4	4	4	1	2	0	3	1	0	5	1	1	1	2	4	3	1	3	0	0	5	0	1	0	2	0	2	1	6	0	0	2	1	0	2	0	3	2	1	1
map1lc3c	2	1	1	0	0	2	0	2	0	1	2	2	0	3	1	1	0	1	1	2	0	0	1	0	1	0	0	0	0	0	1	1	0	0	0	0	0	1	1	0	0	0	0	0	0	1	6	0	1
emc6	2	1	0	1	0	0	0	0	0	0	0	0	0	0	0	0	0	1	0	0	0	0	0	0	0	0	0	0	0	0	0	0	0	0	0	1	0	0	0	0	1	0	0	0	1	0	0	0	0
cpeb1	1	1	0	2	0	0	1	3	0	2	0	2	0	3	0	2	0	1	4	0	0	0	1	0	1	4	0	0	0	0	0	0	1	2	0	0	0	1	0	1	0	1	1	0	0	0	4	1	0
LOC108893549	1	2	1	0	4	1	0	0	0	0	2	0	0	1	0	1	2	0	0	0	0	0	0	0	0	0	0	0	0	0	0	1	0	3	0	0	0	0	0	0	1	1	0	0	1	0	6	0	1
kiaa0101	0	0	0	0	0	0	0	1	0	0	0	0	0	0	0	1	0	0	1	0	0	1	0	0	0	1	0	0	0	1	0	0	0	0	0	0	0	1	0	0	0	1	0	0	0	0	0	0	0
rpa3	0	0	1	1	0	0	0	0	0	0	0	2	0	0	0	0	0	0	0	0	0	0	1	1	0	0	0	2	0	0	0	0	0	0	0	0	0	0	0	0	1	0	0	0	0	0	0	0	0
cunh11orf98	0	0	0	0	0	0	0	0	0	0	0	0	0	0	0	0	0	0	0	0	0	0	0	0	0	0	0	0	0	0	0	0	0	0	2	1	0	1	0	0	0	0	0	0	0	0	2	0	0
LOC108879744	1	0	0	0	0	0	0	0	0	0	0	0	0	0	1	0	0	1	0	0	0	0	0	1	1	0	0	0	0	1	0	0	0	0	0	0	0	0	0	0	1	0	0	0	1	0	0	0	0
slbp	0	0	0	0	0	0	0	0	0	2	1	0	0	0	0	0	0	0	0	0	1	0	1	0	0	0	0	0	1	0	0	0	0	0	0	0	0	0	0	0	0	0	0	0	1	1	0	0	1
LOC108872686	2	0	0	0	1	0	0	0	0	0	0	0	0	0	0	1	0	1	2	0	1	0	0	0	0	0	0	0	0	0	0	0	0	0	0	0	0	0	0	0	1	0	0	0	0	0	1	2	0
phf5a	0	0	0	0	0	0	0	0	0	0	0	0	0	0	0	1	0	0	0	0	0	0	0	0	0	1	0	1	0	0	0	0	0	0	0	0	0	1	0	0	0	1	0	1	0	1	4	0	0
LOC108899897	3	0	0	1	0	0	0	0	0	0	0	0	1	0	0	0	1	0	1	0	0	0	0	0	0	0	0	1	0	0	0	1	0	0	0	0	0	0	0	0	0	0	0	0	1	0	6	0	0
LOC108886974	1	1	1	0	0	0	1	2	0	0	1	0	0	0	0	0	0	1	0	0	1	0	0	1	0	1	0	0	0	0	0	1	2	1	0	0	0	0	1	0	0	1	0	0	0	0	0	0	0
hdac2	0	0	0	1	0	1	0	0	0	0	0	0	0	0	0	0	0	0	0	0	0	0	0	0	0	0	0	1	0	0	1	0	0	0	0	0	0	0	0	0	0	0	0	0	0	0	0	2	0
LOC108893372	3	0	0	0	0	0	1	0	0	0	1	0	0	0	0	3	0	0	0	1	2	0	1	1	0	0	0	0	0	1	0	0	0	2	0	0	1	0	0	0	0	0	0	0	0	0	6	1	1
LOC108872727	1	1	0	1	0	0	1	0	0	0	0	0	0	0	0	3	0	0	0	1	0	0	1	0	0	1	0	0	0	0	0	1	0	0	2	1	1	0	0	0	0	0	1	0	0	0	0	3	1
LOC108875735	7	1	1	1	2	2	0	2	2	3	2	1	0	1	0	2	4	0	1	1	2	2	1	1	4	0	1	1	2	1	0	1	0	2	2	5	0	0	3	2	1	3	1	1	1	1	2	5	2
patl2	2	0	0	0	0	0	0	0	0	0	0	1	0	0	0	1	1	1	3	0	0	0	0	0	0	0	0	0	0	1	1	0	0	0	0	1	0	0	0	0	0	0	0	0	0	1	1	0	0
LOC108894268	0	0	0	0	0	0	0	0	0	0	0	0	0	0	0	0	0	0	0	0	0	0	2	0	0	0	0	0	0	0	0	1	0	0	0	1	0	0	1	0	0	0	0	0	0	0	0	0	1
LOC108899879	4	1	3	0	0	2	1	1	0	2	2	0	0	2	1	1	0	0	0	0	2	0	0	0	1	1	1	0	0	0	1	1	1	3	2	0	1	0	0	0	1	2	0	2	0	1	3	0	1
ctcf	2	0	1	0	0	0	1	0	0	0	0	1	0	0	0	1	0	0	0	0	0	0	0	0	0	0	0	0	0	0	1	0	0	0	0	0	0	0	0	0	0	1	0	0	0	0	0	0	0
LOC108887805	1	0	0	0	0	0	0	0	0	0	0	0	0	0	0	0	0	0	0	0	0	0	0	0	1	0	0	0	0	1	0	0	0	0	0	0	0	0	0	0	0	0	0	0	0	0	0	0	0
LOC108896419	2	0	0	0	0	0	0	0	0	0	0	0	0	0	0	1	0	0	0	0	0	1	0	0	0	0	0	0	0	0	0	0	0	0	0	0	0	0	0	0	0	0	0	0	0	1	2	0	0
ccnb3	1	0	1	0	0	0	0	0	1	0	0	0	0	0	0	2	0	0	0	0	0	0	0	1	0	0	0	0	0	0	1	0	0	0	0	0	0	0	0	0	0	0	1	0	0	0	3	0	0
LOC108901751	0	0	0	0	0	0	0	0	0	0	0	0	0	0	0	0	0	0	0	0	0	0	1	1	0	0	0	0	0	0	0	0	0	1	0	1	0	0	0	0	0	0	0	0	0	0	2	0	1
tbp	0	0	0	0	0	0	1	0	0	0	0	0	0	0	0	0	0	0	0	0	0	0	0	0	1	0	0	0	0	0	0	0	0	0	1	0	0	0	0	0	0	0	0	0	0	0	0	1	0
LOC108880306	0	0	0	0	0	0	0	0	1	0	0	0	0	0	0	0	0	0	0	0	0	2	0	0	0	0	0	0	0	1	0	0	0	0	0	1	0	0	0	1	0	0	0	0	0	0	0	0	0
LOC108899904	5	1	0	0	0	0	0	0	1	0	2	0	0	0	0	0	0	0	1	0	1	0	1	1	0	1	0	0	1	1	0	1	0	2	1	1	1	1	2	0	0	2	0	0	0	0	1	0	0
LOC108878488	0	2	0	0	0	0	0	0	0	0	0	0	0	0	1	0	0	0	0	0	0	0	0	0	1	0	1	0	0	0	1	0	0	0	0	0	0	0	0	0	1	0	0	0	0	0	0	0	0
LOC108875843	3	1	1	0	0	0	0	0	0	0	0	0	0	0	0	0	0	0	1	0	0	0	0	0	0	1	0	0	0	0	0	0	0	0	1	0	0	0	0	0	0	1	0	0	0	0	0	1	0
LOC108873012	1	0	1	2	0	0	0	0	0	1	0	1	0	0	0	1	0	0	1	0	2	2	0	0	0	0	0	0	0	0	0	0	0	0	0	0	0	0	0	0	1	1	0	1	0	0	0	1	0
LOC108889851	1	1	2	1	0	1	0	1	0	0	1	0	0	0	0	0	0	0	2	0	0	0	0	0	0	0	0	0	1	0	0	0	1	0	0	0	0	0	0	1	0	0	0	0	0	0	4	0	0
ube2c	2	0	0	3	0	1	0	0	1	1	0	0	0	1	0	1	0	1	0	1	0	0	0	1	0	1	0	0	0	0	0	0	0	0	0	0	0	0	1	0	1	1	0	0	1	1	0	1	0
LOC108876682	0	0	0	0	0	1	0	0	1	0	0	0	1	0	0	1	0	0	0	0	0	0	0	0	0	0	2	0	1	0	0	0	0	0	0	0	0	0	0	0	0	2	0	0	0	0	0	1	0
LOC108890048	0	0	1	0	0	0	0	1	0	0	0	0	0	0	0	0	2	0	0	0	0	0	0	0	0	0	0	0	1	0	0	0	0	0	0	0	0	0	0	0	0	0	0	0	0	0	0	0	0
raver1	2	0	0	0	0	0	0	0	0	0	0	0	0	0	0	1	0	0	0	1	0	0	0	0	1	0	0	0	0	0	1	0	0	1	0	0	0	0	0	0	0	0	0	0	0	0	0	0	0
polr2h	0	1	0	0	0	0	0	0	0	0	0	0	0	0	0	1	0	0	0	2	0	0	0	0	0	0	0	0	0	0	0	0	0	0	0	0	0	0	0	0	0	0	1	0	0	0	0	0	0
LOC108902764	2	1	0	0	0	1	0	1	0	0	1	1	0	1	0	0	0	0	0	0	1	0	2	1	0	1	1	0	0	0	0	0	0	1	1	0	0	0	0	0	0	0	0	0	1	0	3	0	0
eif4enif1	1	0	1	0	0	0	0	0	0	0	1	0	0	0	0	2	0	0	1	0	0	0	0	0	0	0	1	0	0	0	0	0	0	0	0	0	0	0	1	0	0	0	0	0	0	0	0	0	0
larp7	0	0	0	0	0	0	0	0	1	0	0	0	0	0	0	1	0	0	3	0	0	0	0	0	0	0	0	0	0	0	0	0	0	0	0	0	0	0	0	0	0	0	0	0	0	0	0	1	0
LOC108879525	0	1	0	0	0	0	0	1	0	0	0	0	0	0	0	0	1	0	0	0	0	1	0	0	0	0	0	1	0	0	1	0	0	0	0	0	0	0	0	0	2	0	0	0	0	0	0	0	0
dclre1a	0	3	0	0	0	3	0	1	2	0	1	0	0	1	1	0	0	0	0	0	0	0	0	1	0	0	0	0	0	0	0	0	0	0	0	0	0	2	0	0	0	0	0	1	0	0	2	1	0
dapl1	0	0	0	1	0	1	0	0	0	1	0	0	0	0	0	0	0	0	0	0	0	0	0	0	0	0	0	0	0	0	0	0	0	0	0	0	0	0	0	0	0	0	0	1	0	0	4	0	0
paics	1	1	0	0	1	1	0	0	1	1	0	0	0	0	0	1	0	1	0	0	0	0	0	0	1	0	0	0	0	0	0	1	0	2	0	0	0	0	0	0	0	0	0	0	1	0	4	0	0
prpf3	0	0	0	0	0	0	1	0	0	0	0	0	0	0	0	1	1	0	0	0	0	0	0	0	0	0	0	0	0	0	0	0	0	0	0	0	0	0	0	0	0	0	0	0	0	0	0	0	0
alox5	2	0	1	1	0	0	0	0	0	0	0	0	0	0	0	0	1	0	0	0	0	1	0	0	0	0	0	0	0	0	0	0	0	0	0	0	0	1	0	0	0	0	0	0	1	0	0	0	0
LOC108894823	0	0	0	1	2	0	0	1	1	0	2	0	0	0	0	0	0	1	0	0	0	0	0	0	0	0	0	0	0	0	0	0	0	0	0	0	0	0	0	0	0	1	1	0	0	0	3	1	1
pcgf1	1	0	0	0	0	0	0	1	1	0	0	0	0	0	1	0	0	0	0	0	0	0	0	0	0	0	0	0	0	0	0	0	1	0	0	1	0	1	0	0	1	0	0	1	0	1	1	0	1
fam103a1	2	1	0	0	0	0	1	2	0	0	1	1	0	1	0	0	0	0	0	0	0	0	0	0	0	0	0	0	0	0	0	2	0	0	0	0	0	0	0	0	1	1	0	1	0	0	0	0	0
wdr77	0	0	0	0	0	0	0	0	0	0	0	0	0	0	0	0	0	0	0	0	0	0	1	0	0	0	0	0	0	0	0	0	0	0	0	0	0	0	0	0	1	0	0	2	0	0	1	0	0
cdc20	3	1	0	0	0	1	0	1	0	0	2	0	0	2	0	2	0	0	2	0	0	0	0	2	0	0	1	1	1	0	1	0	0	0	0	1	0	1	1	0	0	0	1	0	2	1	0	0	0
lyrm7	0	0	0	0	0	0	0	0	0	0	0	0	0	0	0	1	0	0	1	0	0	0	1	1	0	0	0	1	0	0	0	0	0	0	0	0	0	0	0	0	0	0	0	0	0	0	2	0	1
LOC108883734	2	0	0	0	1	1	0	0	0	0	0	0	0	0	0	0	0	0	0	0	0	0	0	0	0	0	0	0	0	0	0	0	0	0	0	0	0	0	0	0	0	0	0	1	0	0	0	0	1
LOC108891564	1	0	0	1	0	0	0	1	2	1	0	0	0	0	0	1	0	0	0	0	0	0	0	0	0	0	0	0	0	0	0	0	1	0	0	0	0	0	0	0	0	0	1	0	0	0	1	0	0
LOC108895975	0	0	1	1	1	0	0	1	0	0	1	0	0	1	1	1	0	0	0	0	0	0	0	0	2	0	0	0	0	0	0	0	0	1	1	0	0	0	0	0	0	0	0	0	0	0	3	1	0
nip7	0	0	0	0	0	1	0	0	0	0	0	0	0	0	0	1	0	1	0	0	0	0	0	0	0	0	0	0	1	0	0	0	0	0	0	0	0	0	0	0	0	0	0	0	0	0	5	0	0
gtf3a	5	2	0	0	0	1	1	1	0	0	0	0	0	0	0	2	0	1	3	0	0	0	0	2	1	0	0	1	0	0	1	3	0	0	1	2	0	0	1	0	0	0	1	1	2	1	0	5	1
prpf19	0	0	0	1	0	0	0	0	4	0	0	0	1	1	1	2	0	0	0	0	0	0	0	0	0	0	0	0	0	0	0	0	1	0	0	0	0	0	0	0	1	0	0	0	0	0	0	0	0
LOC108889490	2	1	0	0	0	0	0	0	1	2	0	2	1	1	0	0	0	0	1	0	0	1	0	0	0	0	0	0	0	0	0	0	0	0	1	0	0	0	0	0	0	0	0	1	0	1	2	0	0
elovl7	1	0	0	0	1	0	0	0	0	0	0	0	0	0	0	0	0	0	0	0	0	0	2	0	0	0	0	0	0	0	0	0	0	0	0	1	0	0	0	0	0	0	0	0	0	1	0	0	0
rpa2	0	0	0	0	0	0	0	0	0	0	0	0	0	0	0	1	0	0	0	1	0	0	0	0	1	0	0	0	0	0	0	0	0	0	0	0	0	0	0	0	0	0	0	0	0	0	1	0	2
ndufs3	0	0	0	0	0	0	0	0	0	0	0	0	0	0	0	2	0	0	1	0	0	1	0	1	0	0	0	0	0	0	0	0	0	0	0	0	0	0	0	0	0	0	0	0	0	1	3	0	0
hmga1	0	0	0	0	0	0	0	0	0	0	0	0	0	0	0	1	0	0	1	1	0	0	1	0	0	0	0	0	0	0	0	1	0	0	0	1	0	0	0	0	0	0	0	0	0	0	0	1	0
ints8	1	0	0	0	1	0	0	0	0	1	0	0	0	0	0	0	0	0	0	1	0	1	0	0	0	0	0	0	0	0	0	0	0	0	0	0	0	0	0	0	0	1	0	0	0	0	0	0	0
cisd1	1	0	0	0	0	0	0	0	0	0	1	0	0	0	0	0	0	0	1	0	0	0	0	0	0	0	0	0	0	0	1	0	0	0	0	0	0	0	0	0	0	0	0	0	0	1	1	0	1
fbxl13	0	0	0	0	0	0	0	0	0	1	0	1	0	1	0	0	0	1	0	0	0	0	0	0	0	0	0	0	0	0	0	0	0	0	0	0	0	0	0	0	0	0	0	0	1	1	0	0	0
LOC108876600	1	0	0	0	0	1	0	0	2	0	0	2	0	0	0	1	0	0	2	0	0	0	0	0	0	0	0	1	0	0	0	0	0	0	0	0	0	0	1	0	0	0	0	0	0	0	0	3	0
LOC108877213	3	0	0	0	0	1	0	0	0	0	0	0	0	0	0	0	0	0	0	0	0	1	0	0	0	0	0	0	0	0	0	0	0	0	0	0	0	0	0	0	0	0	0	0	0	1	0	0	0
LOC108895907	1	0	0	1	1	1	0	1	0	0	0	0	0	0	0	1	0	0	0	0	0	0	0	0	0	0	0	0	0	0	1	0	1	0	0	0	0	1	0	0	1	2	0	0	0	1	0	1	0
rpain	0	0	0	0	0	0	0	0	0	0	0	0	0	0	0	0	0	0	0	2	0	1	1	0	0	0	0	0	0	0	0	0	1	0	0	0	0	0	0	0	1	0	0	0	0	0	0	0	1
LOC108884547	1	1	0	0	0	0	0	1	0	0	0	0	0	0	0	0	0	0	1	0	1	1	0	0	0	0	1	0	0	0	0	0	0	0	0	0	0	0	0	0	0	0	0	0	0	0	0	0	0
cbx5	0	0	0	1	0	0	0	0	0	0	1	0	0	0	0	2	0	0	0	0	0	1	0	1	0	0	0	0	0	0	0	0	0	1	0	2	0	0	0	0	0	1	0	2	0	0	0	0	0
utp11	0	2	0	0	0	1	0	0	0	1	0	0	0	0	0	1	1	0	0	0	0	0	1	0	0	0	0	0	0	0	0	1	0	0	0	0	0	0	0	0	1	0	0	0	0	0	0	0	0
LOC108901552	0	0	0	0	0	0	0	0	2	0	0	0	0	0	0	0	0	0	1	0	0	0	0	0	0	0	0	0	0	0	0	0	0	0	0	0	1	0	0	0	0	0	0	0	0	0	2	1	0
ccdc62	0	0	0	0	0	0	1	0	0	0	0	0	0	0	0	1	0	0	0	0	0	0	0	0	0	0	0	0	0	1	0	1	0	0	0	0	0	0	0	0	0	1	0	0	0	0	0	0	0
LOC108893843	4	0	1	1	0	0	0	0	0	0	0	0	0	0	0	0	0	1	0	0	0	1	0	1	0	1	0	1	1	0	1	0	0	0	0	0	0	0	2	1	0	0	0	1	2	0	0	1	0
ide	1	0	0	0	0	0	0	0	0	0	0	0	0	0	0	1	0	0	0	0	0	0	0	0	0	0	0	0	0	1	0	0	0	0	1	0	0	0	0	0	0	0	0	0	0	0	0	1	0
LOC108895250	1	0	0	0	0	0	0	0	3	0	1	0	0	0	0	0	0	0	0	0	0	2	0	0	0	0	0	0	0	0	0	1	0	0	0	0	0	0	0	0	0	0	0	0	0	0	0	1	0
cdca8	0	0	0	0	1	0	0	1	0	0	0	0	0	1	0	0	0	0	1	0	0	0	0	0	0	0	0	1	0	0	0	1	1	0	0	1	0	0	0	0	0	0	0	0	0	0	0	0	0
LOC108878920	0	0	0	1	0	1	0	0	0	0	0	0	0	0	0	1	0	1	0	0	0	0	0	0	0	0	1	0	0	0	0	0	0	0	0	0	1	0	0	0	0	0	0	1	0	0	0	0	0
LOC108877612	0	0	0	0	0	0	0	0	1	0	0	0	0	0	0	1	0	0	0	0	0	0	0	0	0	0	0	0	0	0	0	0	0	0	0	0	1	0	0	0	0	0	0	0	0	0	0	0	0
LOC108885024	2	1	0	1	1	0	0	1	0	0	1	0	1	0	1	0	0	0	0	2	1	0	0	0	0	0	0	0	0	0	1	0	0	0	0	1	0	0	0	1	0	2	0	0	0	0	0	0	0
LOC108892417	1	0	0	0	0	0	0	1	1	0	0	0	0	0	0	0	0	0	1	0	0	1	0	0	0	0	0	0	0	0	0	0	0	0	0	0	0	1	1	0	0	1	0	0	0	1	0	0	0
LOC108880295	0	0	1	0	0	0	0	0	0	0	1	1	0	0	0	0	0	0	0	0	0	0	0	0	0	0	0	1	0	0	0	0	0	0	0	0	0	0	1	0	0	0	0	0	0	0	0	0	0
LOC108889361	0	0	0	0	0	0	0	0	1	0	1	0	0	0	0	1	0	0	0	0	0	0	0	2	0	0	0	0	0	1	0	0	0	0	0	0	0	1	1	0	0	0	0	0	0	0	0	0	1
LOC108875080	3	0	1	1	0	0	0	0	0	0	0	1	0	0	0	1	0	1	0	0	0	1	0	0	0	0	0	0	0	0	0	0	0	0	0	0	0	0	0	0	0	0	0	0	0	0	0	2	0
LOC108893023	0	0	0	0	0	0	0	1	0	0	0	0	0	0	0	0	1	0	2	0	1	0	0	0	0	0	0	0	0	0	0	0	0	0	0	0	0	1	0	0	0	0	0	0	0	0	0	0	0
LOC108898158	1	3	0	0	3	0	0	2	1	0	0	0	0	1	0	1	0	0	2	2	0	0	0	1	1	0	2	0	1	1	1	1	0	1	0	0	1	1	1	1	0	0	1	0	0	1	0	1	0
LOC108884661	0	0	0	0	0	0	0	0	0	0	0	0	0	0	0	0	1	0	0	2	0	0	0	0	0	0	0	0	0	0	0	0	0	0	0	0	0	0	0	0	0	0	0	0	0	0	1	0	0
LOC108887833	2	2	1	0	0	0	0	0	0	0	0	0	0	1	0	2	0	0	3	0	0	0	0	0	0	0	0	0	0	0	0	0	0	1	0	0	0	1	0	0	0	0	0	0	0	0	4	2	0
trmt112	1	1	0	1	0	0	0	0	0	0	0	0	0	0	0	0	0	0	0	1	1	0	0	0	0	0	0	0	0	0	0	0	0	0	0	0	0	0	0	0	0	0	0	0	0	0	1	0	0
ube2g1	0	0	0	0	0	0	0	0	0	0	3	0	0	0	0	0	0	0	0	0	0	0	0	0	0	1	0	0	0	0	0	0	0	0	0	0	0	0	0	0	0	0	0	0	0	0	0	0	0
pcmt1	1	0	1	2	0	0	0	0	0	0	0	0	0	0	0	0	0	1	1	0	0	0	0	0	1	0	0	0	0	0	0	1	0	0	0	0	0	0	0	0	0	0	0	0	0	0	3	0	0
lpcat4	2	0	0	0	0	0	0	0	2	0	0	0	2	0	0	0	0	0	1	0	0	0	2	0	0	0	0	1	1	0	0	0	0	0	0	1	0	0	0	0	0	0	0	0	0	1	0	0	0
LOC108885617	0	0	0	0	0	0	0	0	0	0	0	0	0	0	0	0	0	0	0	0	0	0	0	0	0	0	0	0	0	0	0	0	0	0	0	0	1	0	0	0	0	0	0	0	0	0	0	0	0
ddit4l	4	0	0	0	0	0	0	0	1	0	0	0	0	0	0	2	0	0	0	0	0	0	0	1	0	0	0	0	0	0	0	0	0	0	2	0	0	0	0	0	1	0	0	0	0	0	0	0	0
LOC108887942	0	0	0	3	0	0	0	0	1	0	0	0	0	0	0	2	0	0	1	0	0	1	1	1	0	1	0	1	0	2	0	0	0	0	0	0	0	0	0	0	1	0	0	0	1	0	2	0	1
LOC108876460	0	0	0	1	0	0	0	1	0	1	0	0	0	0	0	2	0	1	1	0	0	0	0	1	0	0	0	0	0	0	0	0	1	0	0	0	0	0	0	1	0	0	1	0	0	0	1	0	0
ppp1r36	0	0	0	1	0	0	0	0	0	0	0	0	0	0	0	0	1	0	0	0	0	1	1	0	0	0	0	0	0	0	0	0	0	0	0	0	0	0	0	0	0	0	0	0	0	0	0	0	1
dctpp1	0	0	1	1	0	0	0	0	0	0	0	0	0	0	0	1	0	0	1	0	0	0	0	0	0	0	0	0	0	0	0	0	0	0	0	0	1	0	0	0	0	0	0	0	0	0	0	0	1
LOC108896494	2	2	0	1	1	0	0	0	0	2	0	1	0	0	1	1	0	0	1	0	0	0	0	0	0	0	0	0	1	0	1	1	0	0	1	0	0	0	1	0	0	0	0	0	0	0	1	1	0
LOC108887200	0	0	0	1	0	0	0	0	0	0	0	1	1	0	0	2	0	0	1	0	0	1	0	0	0	0	0	0	0	0	0	0	0	0	0	1	0	1	0	0	1	0	1	0	0	1	0	0	0
LOC108891469	1	0	0	0	0	0	0	0	0	0	0	0	0	0	0	1	0	0	1	0	0	0	0	0	0	0	0	0	0	0	1	1	0	0	0	0	0	0	0	0	0	0	0	0	0	0	1	0	0
hells	0	1	0	0	0	0	0	0	0	0	0	0	0	0	0	1	0	0	0	0	0	0	0	0	0	0	0	0	0	0	0	0	0	0	0	1	0	0	0	0	0	0	0	0	0	0	0	1	0
slirp	0	0	0	1	0	0	0	0	0	0	0	0	0	1	0	0	0	0	0	1	0	0	1	0	0	0	0	0	0	1	0	1	0	0	0	0	0	0	0	0	0	0	0	0	0	0	0	0	0
LOC108900215	0	0	0	0	0	0	0	0	0	0	1	0	0	0	0	0	0	0	0	0	0	2	0	0	0	1	0	0	0	0	0	0	0	0	0	0	0	0	0	0	0	0	0	0	0	0	2	0	0
LOC108877320	1	1	1	0	0	0	0	0	0	0	0	0	0	0	0	0	0	0	0	1	0	2	0	0	0	0	0	0	0	0	0	0	0	0	0	0	1	0	0	0	0	0	0	0	0	0	0	0	0
LOC108887079	3	0	0	0	0	0	0	0	0	1	0	0	0	0	1	0	0	0	0	0	0	0	0	0	0	0	0	0	0	0	0	0	0	0	0	1	0	0	0	0	0	0	0	0	0	0	0	0	0
LOC108889975	0	0	1	0	0	0	0	0	1	2	0	0	0	1	0	1	0	1	0	0	0	0	0	0	0	1	0	0	0	0	0	0	2	1	0	1	0	0	0	0	0	0	0	1	0	0	0	0	1
LOC108898776	0	0	0	0	0	0	0	0	0	1	0	1	0	0	0	0	1	0	0	0	0	0	1	0	0	0	0	1	1	0	0	0	0	0	0	0	1	0	0	1	0	0	0	0	0	0	2	0	0
LOC108872946	0	0	0	0	0	0	0	0	0	0	0	0	0	0	0	0	0	0	0	0	1	0	0	0	0	0	0	0	0	0	0	0	0	0	1	0	0	0	0	0	0	0	0	1	0	0	2	0	0
igf2bp3	1	0	2	0	0	0	0	0	0	0	0	0	0	0	0	0	0	0	1	0	0	0	0	0	0	0	0	0	0	0	0	0	0	1	0	0	0	0	1	0	0	0	0	0	2	0	0	0	0
calm2	2	1	2	1	0	0	0	1	0	2	0	0	0	2	0	2	0	1	1	0	0	0	0	0	0	0	0	1	0	0	0	1	0	0	1	1	0	0	1	1	0	0	0	0	0	0	2	0	0
LOC108898660	2	0	1	0	0	0	0	1	1	0	2	0	0	0	0	0	0	0	0	1	0	0	0	0	0	1	0	0	1	0	0	0	0	1	0	0	0	0	0	1	0	0	0	0	0	1	0	0	1
selenot	0	0	0	0	0	0	0	0	0	1	0	0	0	0	0	1	0	0	0	0	1	0	0	0	0	1	0	0	0	0	0	1	0	0	0	0	1	0	1	1	0	1	0	0	0	0	0	0	0
cks1b	1	0	0	0	0	0	0	1	1	0	1	0	0	0	1	0	0	0	0	1	1	1	0	1	1	1	0	0	0	1	1	4	0	0	2	0	0	1	2	0	0	0	0	0	0	0	1	1	0
LOC108879577	1	0	0	0	0	0	0	0	0	0	0	0	0	0	0	0	0	0	0	0	0	0	0	0	0	0	0	0	1	0	0	0	0	0	0	0	0	0	0	0	0	0	0	0	0	0	0	0	0
lbh	3	0	1	0	0	0	0	0	0	0	0	0	0	0	0	0	0	0	1	0	0	0	0	0	0	0	0	0	0	0	0	2	0	0	0	0	1	0	0	0	0	0	0	0	0	0	0	1	0
acsl5	0	0	0	0	0	1	0	0	1	5	2	1	0	0	1	1	0	0	0	0	0	1	0	1	0	1	0	0	0	0	0	1	0	0	0	0	0	0	0	0	0	0	0	0	0	0	2	0	0
gmps	1	0	0	0	0	0	0	0	1	0	0	0	0	0	0	0	0	0	1	0	0	0	1	0	0	0	0	0	0	0	0	0	1	0	0	0	0	0	1	0	0	0	0	0	0	1	0	0	0
plk1	0	0	0	0	0	0	0	0	0	0	0	1	0	0	0	0	0	0	0	0	0	0	0	0	0	0	0	0	2	0	0	0	0	0	1	0	0	0	0	0	0	0	0	1	1	0	0	0	0
LOC108893743	2	0	0	0	0	0	0	1	1	0	1	0	2	0	0	0	0	0	0	0	0	0	1	1	0	0	0	1	0	0	0	0	1	0	0	0	0	0	0	0	0	1	0	0	0	1	0	0	0
LOC108888640	1	0	0	1	0	0	0	0	0	1	1	0	1	0	0	0	0	0	2	0	0	0	0	0	0	0	0	0	0	0	0	0	1	0	0	0	0	0	0	0	0	0	1	0	1	0	0	0	0
ube2i	0	1	0	0	0	0	0	0	0	0	1	1	0	0	0	0	0	0	0	3	0	0	0	2	0	0	1	0	0	0	0	0	1	0	0	0	0	0	0	0	1	0	0	0	0	0	0	0	0
alg5	3	0	0	0	0	0	0	0	0	0	0	0	1	0	0	1	1	0	1	0	0	0	0	0	1	0	0	0	0	0	0	0	0	0	0	0	0	0	0	0	0	0	0	0	1	0	0	0	0
LOC108891098	0	0	0	0	0	0	0	0	0	0	0	1	0	0	0	0	0	0	0	0	0	0	0	0	0	1	0	0	0	0	1	0	0	0	0	0	0	0	0	1	0	2	0	0	0	1	0	0	0
LOC108880798	0	0	0	0	0	0	0	0	0	0	0	0	0	0	0	0	0	1	0	0	0	0	0	0	0	0	0	0	0	0	0	1	0	0	0	0	0	0	0	0	0	0	0	0	0	0	0	0	0
mrpl36	0	0	0	0	0	0	0	1	0	0	1	0	0	0	0	1	0	0	0	0	0	0	0	0	0	0	0	0	0	0	0	0	0	0	0	0	0	0	0	0	0	0	0	0	0	0	2	0	0
ccdc43	0	0	0	0	0	0	1	0	0	0	0	0	0	0	0	0	0	0	1	0	0	0	0	0	0	0	0	0	0	0	0	0	0	0	0	0	0	0	0	0	0	1	0	0	0	0	2	0	0
LOC108885075	0	0	0	1	0	0	0	0	0	0	0	1	0	0	1	0	0	0	0	0	0	0	0	0	1	0	0	0	0	0	0	0	0	0	1	0	0	0	0	0	0	0	0	0	0	0	0	0	0
tacc3	0	0	0	0	0	0	1	0	0	0	0	0	0	1	0	0	0	0	0	0	0	0	0	0	0	0	0	0	1	0	0	0	0	0	0	1	0	0	0	0	2	0	0	0	0	0	0	0	0
folr2	0	0	1	0	0	0	0	0	0	0	1	0	0	0	1	0	0	0	0	0	0	0	0	0	0	0	0	0	0	0	0	0	0	0	0	0	0	0	0	0	0	0	0	0	0	0	0	1	0
LOC108897759	0	0	0	0	0	0	0	0	0	0	0	0	0	0	0	0	0	0	0	0	0	0	0	1	0	1	0	0	0	0	0	0	0	1	0	0	0	0	0	0	0	0	0	0	0	0	0	0	0
haus1	1	0	0	0	0	0	0	1	1	0	0	0	0	0	0	0	0	0	0	0	1	0	0	0	0	0	1	0	0	0	0	0	0	0	0	0	0	0	0	0	0	0	0	0	0	0	0	0	0
LOC108876504	0	0	1	0	0	0	0	0	0	0	0	0	0	0	0	0	0	1	1	0	0	0	0	2	0	0	0	1	0	0	0	1	0	0	0	0	0	0	0	0	0	0	0	0	0	0	0	0	0
exd2	0	0	0	0	0	0	0	0	0	1	0	0	0	0	0	0	0	0	0	0	0	0	1	0	0	0	0	0	1	0	0	0	0	0	0	0	0	0	0	0	0	0	0	0	0	0	0	0	0
LOC108876532	0	0	0	0	0	0	0	2	0	0	0	0	0	1	0	2	0	0	0	0	0	0	0	0	2	0	0	0	0	0	0	0	0	1	1	0	0	0	0	0	0	0	0	0	0	0	2	0	0
LOC108881526	1	0	0	0	0	0	0	0	0	0	1	0	0	0	1	0	0	0	0	0	0	0	0	0	0	0	0	0	0	0	1	0	0	0	1	0	0	0	0	0	0	0	0	0	0	0	0	0	0
tk1	0	1	0	0	1	1	0	0	0	0	0	0	0	0	0	0	0	0	0	0	0	0	1	0	0	0	0	0	0	0	0	1	0	1	0	1	0	0	0	0	0	0	0	0	0	0	0	0	0
LOC108879229	0	0	0	1	2	0	1	0	0	0	0	0	0	0	0	0	0	0	0	0	0	0	0	0	0	0	0	0	0	0	1	0	0	0	0	0	1	0	0	0	0	0	0	0	0	0	0	0	0
LOC108896761	0	0	0	0	0	0	0	0	0	0	0	0	0	0	0	0	0	0	0	0	0	0	0	0	0	0	0	0	0	0	1	0	0	0	0	0	0	0	0	0	0	0	0	0	0	0	0	0	0
LOC108899456	0	1	0	1	0	1	0	0	0	0	0	0	0	1	0	0	0	0	0	0	0	0	0	0	0	0	0	0	0	0	0	0	0	2	0	0	0	0	0	0	0	1	0	0	0	0	0	0	0
uchl5	0	0	2	1	1	0	0	0	0	0	0	0	0	0	0	0	0	0	0	1	0	0	0	0	1	0	0	0	0	0	0	1	0	0	0	0	0	0	0	0	0	0	0	0	0	0	0	0	0
LOC108891945	0	0	0	0	0	0	0	0	0	0	0	0	0	0	0	0	0	0	0	0	0	0	0	0	0	1	0	0	0	0	0	0	0	0	0	0	0	0	0	1	0	1	0	0	0	0	0	0	0
etnppl	0	1	1	0	0	0	0	0	0	0	1	0	0	0	0	1	0	0	1	0	0	0	0	0	0	0	0	0	0	0	0	0	0	0	0	1	0	0	0	0	0	0	0	1	0	0	0	0	0
LOC108899369	0	1	0	0	0	0	0	0	0	0	0	0	0	0	0	0	0	0	0	0	0	0	0	1	0	0	0	0	0	0	0	0	0	0	0	0	0	0	0	0	0	1	1	0	0	0	2	0	0
hltf	1	0	0	0	0	0	0	0	0	0	0	1	2	0	0	0	1	0	0	0	0	0	0	0	1	0	0	1	0	0	0	0	0	0	0	0	0	0	0	0	0	0	0	0	0	0	0	0	0
LOC108890302	0	0	0	0	0	0	0	0	0	0	0	0	0	0	0	0	0	0	0	0	0	0	0	0	0	0	0	0	0	1	0	0	0	0	0	0	0	0	0	0	1	0	0	0	0	0	0	0	0
LOC108879662	0	0	0	0	0	0	0	0	0	0	0	0	0	0	0	2	0	0	0	0	0	0	0	0	0	0	0	0	0	0	0	0	0	0	0	0	0	0	0	0	0	0	0	0	0	0	0	0	0
tmem35a	0	0	0	0	0	0	0	0	0	0	0	0	0	0	0	1	0	0	0	0	0	0	0	0	1	0	0	0	0	0	0	0	0	0	0	0	0	0	0	0	0	0	0	0	0	1	0	0	0
guk1	0	0	0	0	0	0	0	0	0	0	0	0	0	0	1	0	0	0	0	0	0	0	0	0	0	0	0	0	0	0	0	0	0	0	0	0	0	0	0	0	0	0	0	0	0	0	0	1	0
LOC108884465	1	0	0	0	0	0	0	0	0	0	0	0	0	0	0	1	0	0	0	0	0	0	0	0	0	0	0	0	0	0	0	0	0	0	0	0	0	0	0	0	0	0	0	0	0	0	0	0	0
LOC108891570	0	1	0	0	0	0	0	0	0	0	0	0	0	0	0	0	0	0	0	1	0	0	0	0	0	0	0	0	0	0	0	0	0	0	0	0	0	0	0	0	0	0	0	0	0	0	0	0	0
nanos3	1	1	2	0	0	1	0	0	0	0	0	0	0	1	0	0	1	0	0	0	0	0	1	0	0	0	0	0	0	0	0	1	0	0	0	0	0	0	0	0	0	0	0	0	0	1	1	0	0
gdf9	0	0	0	0	0	0	0	0	0	0	0	0	0	0	0	0	0	0	0	0	1	0	0	0	0	1	0	0	0	0	0	0	0	0	0	0	0	0	0	0	0	0	0	0	0	0	0	0	0
dnd1	0	0	0	1	0	1	0	0	0	0	0	0	0	0	0	1	0	2	0	0	0	0	0	0	0	0	0	0	0	0	0	0	0	0	0	0	0	0	0	0	0	0	0	0	0	0	0	2	0
dazl	0	0	0	1	0	0	0	0	0	0	0	0	0	0	0	2	0	1	8	0	0	0	1	0	0	0	0	0	0	1	0	0	0	0	0	0	0	0	0	0	0	1	0	0	0	0	3	0	0
ddx4	1	0	0	2	0	0	0	0	0	0	0	0	0	0	0	12	0	1	4	0	0	0	1	0	0	0	0	0	0	0	0	0	0	0	0	1	0	0	0	0	0	0	0	0	0	0	11	1	0
zar1	9	5	0	4	3	4	2	2	2	6	2	1	1	4	3	11	2	0	10	3	5	4	3	4	3	7	2	0	0	4	2	1	8	5	4	3	2	7	4	3	1	2	3	2	1	11	10	9	8
dmc1	0	0	0	0	0	0	1	0	0	1	1	1	0	1	0	0	0	0	1	0	0	0	0	0	0	0	1	0	0	0	0	0	0	0	0	0	0	0	0	0	0	0	0	1	0	0	0	0	0
ccnb1	9	5	3	5	4	3	2	4	3	7	3	7	1	5	1	7	8	0	6	3	2	7	3	4	0	12	1	2	2	2	5	2	0	3	1	1	2	4	1	0	1	7	1	1	1	2	12	3	5
pcna	1	0	0	1	0	0	0	1	1	2	0	0	0	0	0	0	0	0	1	1	1	1	0	0	0	0	1	0	0	1	0	0	0	0	0	0	0	1	0	0	0	2	0	0	0	1	8	0	0
[truncated: 301 more columns]
