# Supplementary material for: Transcriptome Profiling of the Ovarian Cells at the Single-Cell Resolution in Adult Asian Seabass
Source: Front Cell Dev Biol. 2021 Mar 29;9:647892. doi: 10.3389/fcell.2021.647892 (PMC8039529; doi:10.3389/fcell.2021.647892)
Supplement: Supplementary file 10 [file Table_7.XLSX]

## Sheet: Sheet1
Table S7 Newly identified genes in granulosa cell in this study.
	CGCTCAACGAAT	ATATGTGACCGA	CCACGTCGATGA	CTGTCCTCCGTG	TGTGCTTTCTTA	ATTTATCTGCAA	AGCTAAGTAGTG	CCCATCACCTTG	GCGCGCCGATAC	TTAGCTTACCCA	CTTATGCACGTT	CTGAAGAGGTTG	GACGGGAAATCT	GTAAGGATACGT	AACAGCGCTGAA	TATGCCCGAATC	AGTAGCATTGCG	GGGGGTTCACCC	AGGAGAACACAA	AGCGCTAGGGAG	CCCAAACATTCA	GATTCTTCTGGG	GTGCGGCAGAGG	CGAGAGTTATTG	AAGCAAGCTACA	TTTGGCGCCGAT	GGAATTATCGCT	GGCGTGACGCCA	TCAATGGGTATA	GGGGCACGCATC	TATACTGCATGC	GCCACTCCCCGT	CCCGCTAAGATC	CTTTCCTTTAAT	ACTTGTAGCGAC	CGTTCCAGCATA	AATCAATTCTAG	TTCAGCCGAGTC	CATTCTAGCTCC	GCGGGCCGTTAT	ACCCCTCAGGGA	CGGAACAGCGTG	CTTTAATTATGA	TTCTAAATTCAT	GCCCGTTGTGTA	ACGGCAGGCCTT	GGACCGCGAACG	TCGCGGCTTTAA	GAAGAAAGCAGG
CELLS	gra1	gra2	gra3	gra4	gra5	gra6	gra7	gra8	gra9	gra10	gra11	gra12	gra13	gra14	gra15	gra16	gra17	gra18	gra19	gra20	gra21	gra22	gra23	gra24	gra25	gra26	gra27	gra28	gra29	gra30	gra31	gra32	gra33	gra34	gra35	gra36	gra37	gra38	gra39	gra40	gra41	gra42	gra43	gra44	gra45	gra46	gra47	gra48	gra49
LOC108892211	5	12	8	24	17	16	11	24	13	21	12	7	12	6	9	10	14	1	23	5	10	3	1	11	10	9	9	7	2	1	9	11	4	18	0	5	2	11	2	6	2	10	0	7	23	3	10	11	0
LOC108892212	7	25	16	37	38	31	22	43	32	39	20	8	20	23	24	23	32	0	27	31	25	22	11	23	27	21	20	5	8	7	20	9	20	29	4	9	20	36	18	10	8	23	2	8	34	18	24	20	5
LOC108892190	1	14	2	13	14	17	8	19	20	18	11	4	7	7	11	9	15	2	9	15	10	11	10	14	12	10	8	7	5	2	5	3	8	13	1	5	2	18	4	3	3	8	1	2	10	9	8	10	3
LOC108898305	31	1	12	37	4	5	16	6	3	21	30	23	14	0	9	5	0	2	4	3	10	0	3	29	7	0	0	2	8	2	2	0	3	2	1	4	3	4	0	0	3	0	2	7	4	7	5	2	3
LOC108896796	153	51	40	9	53	33	69	11	62	9	8	13	41	7	14	73	7	15	92	19	21	28	7	34	1	7	0	4	2	34	6	8	0	31	14	0	7	7	6	21	3	39	33	1	15	29	18	23	11
LOC108888247	23	2	0	0	0	1	0	24	3	10	9	0	2	0	3	1	0	1	0	0	0	0	0	0	0	3	0	5	1	1	0	1	0	0	0	2	3	2	0	1	1	0	1	0	12	1	2	4	1
LOC108897454	105	1	4	19	1	4	8	5	13	6	9	5	7	1	7	2	4	3	3	1	11	0	3	21	4	16	1	0	4	5	1	2	0	19	3	7	10	1	0	4	0	4	2	4	8	0	5	2	4
LOC108895611	10	0	6	9	7	37	5	3	0	4	9	6	0	7	14	3	16	0	27	7	25	3	3	10	11	0	4	9	2	2	18	1	3	4	4	0	10	13	0	0	0	0	4	4	1	12	18	2	2
LOC108896630	22	0	0	4	8	0	0	1	1	3	0	3	0	0	1	0	0	0	0	0	1	0	0	0	0	0	0	0	0	4	0	0	1	1	0	3	0	1	0	11	0	2	0	0	0	0	0	6	0
LOC108893370	32	0	8	4	5	3	4	9	6	1	5	3	6	0	5	3	1	2	0	1	0	0	3	0	0	3	2	2	0	7	7	0	3	0	5	3	0	1	0	1	2	1	3	5	5	0	0	2	2
LOC108899350	5	1	0	4	2	0	0	4	1	2	6	0	2	0	4	0	0	0	0	2	0	0	0	0	0	14	0	3	7	8	0	0	9	0	0	1	4	2	0	0	6	0	2	10	9	2	0	0	0
LOC108893420	29	7	6	10	10	3	9	10	6	11	6	1	3	1	4	16	0	5	3	1	7	0	0	9	1	1	1	2	0	0	0	0	9	5	4	2	0	0	2	3	5	5	4	0	2	0	0	7	6
LOC108898144	24	1	1	5	1	1	3	22	7	9	19	1	0	1	3	5	0	1	3	1	2	0	1	0	1	5	1	2	2	4	1	0	0	1	1	3	1	2	0	4	0	5	4	1	6	0	19	5	1
LOC108898190	169	10	10	16	3	8	22	1	42	44	63	3	29	1	11	2	0	0	0	0	9	0	10	23	0	10	0	20	3	15	1	0	0	48	2	23	6	3	0	0	13	0	9	3	18	8	1	12	2
LOC108897788	12	2	1	2	4	3	3	26	3	7	26	0	5	0	17	2	0	1	1	1	1	0	2	2	0	5	0	2	5	9	0	1	7	1	0	2	5	0	0	0	5	0	6	4	15	1	0	4	0
LOC108875304	29	1	2	1	4	2	1	50	5	14	33	2	0	0	15	3	0	2	3	0	0	1	4	1	0	1	5	0	13	19	0	0	11	16	3	1	0	9	0	0	2	3	8	1	14	1	3	1	8
LOC108897073	7	1	20	1	5	12	0	0	7	14	7	4	1	0	8	1	0	3	13	18	10	0	1	1	0	3	0	8	0	5	2	0	1	0	3	4	1	1	0	2	5	4	13	3	2	0	2	4	2
LOC108889698	3	1	4	4	6	1	5	23	34	15	14	0	3	1	9	2	1	0	5	0	2	0	1	2	0	25	0	7	1	15	0	0	7	6	1	9	14	3	0	7	2	3	0	4	44	1	18	7	0
LOC108889751	23	1	9	2	0	0	3	2	0	0	4	2	0	0	3	5	0	3	1	2	6	0	2	1	0	3	0	0	2	2	8	0	2	0	4	2	0	1	0	0	1	0	1	0	3	1	2	1	5
LOC108895929	1	1	2	11	0	5	3	2	0	12	14	0	5	2	3	4	2	0	4	4	1	0	6	4	0	2	3	7	3	4	1	2	3	0	0	3	0	0	1	3	3	2	2	0	1	0	3	4	0
LOC108892885	39	8	2	17	2	3	4	13	1	9	4	1	1	0	3	1	0	0	1	2	5	0	0	9	0	2	2	5	0	4	1	0	2	8	5	1	3	8	0	0	0	0	0	2	0	2	5	13	2
LOC108873580	79	1	2	5	1	0	10	3	1	3	5	2	1	2	3	5	1	8	5	0	3	5	0	2	3	3	5	2	3	7	12	1	3	9	4	2	6	1	0	1	4	1	3	1	3	3	4	11	6
LOC108895835	7	1	8	3	1	0	0	0	0	2	3	14	1	1	1	3	2	0	1	0	12	1	1	2	0	6	0	0	2	1	8	0	1	3	0	1	3	1	0	2	1	0	3	11	11	1	0	0	1
LOC108891774	5	1	3	12	0	10	0	0	2	0	0	0	0	0	0	1	0	1	5	6	16	0	1	2	0	0	0	0	0	0	6	0	0	3	9	0	0	1	0	0	0	0	0	0	0	0	0	1	7
LOC108874625	7	0	1	0	3	5	0	1	8	4	0	0	7	0	0	7	0	2	2	1	1	0	1	0	2	1	2	0	1	2	2	0	3	2	0	3	2	5	1	0	1	2	0	1	0	0	0	15	4
LOC108889716	176	3	8	10	0	10	10	17	9	7	7	7	2	2	15	55	0	30	3	0	18	3	1	2	2	18	1	9	2	12	42	1	3	7	12	6	9	4	3	0	7	1	7	2	18	5	48	14	13
LOC108896590	16	0	1	0	5	6	2	5	7	5	11	3	1	0	6	5	0	0	8	1	4	0	0	1	4	0	3	5	0	13	1	0	0	0	3	1	2	3	0	0	1	0	3	8	2	2	3	6	2
LOC108903018	3	7	1	5	2	4	0	3	3	3	3	2	9	0	2	2	5	0	3	0	0	1	1	2	0	2	0	0	3	1	0	4	3	1	0	1	2	0	0	0	1	0	5	1	8	1	1	1	0
LOC108898187	4	0	0	0	0	0	1	0	0	2	14	0	0	0	6	3	0	0	0	0	0	2	1	0	0	16	0	0	9	1	0	0	3	2	1	0	0	4	0	0	5	1	0	1	4	2	0	0	0
[truncated: 55 more columns]
