# Supplementary material for: Transcriptome Profiling of the Ovarian Cells at the Single-Cell Resolution in Adult Asian Seabass
Source: Frontiers journal article supplement (doi:10.3389/fcell.2021.647892), 2021-03-29
Supplement: Table_2.XLS [file Table_2.XLS]

## Sheet: Table S1
Table S2 Significantly enriched marker genes and corresponding annotations for 5 cell clusters.
name	p_value	avg_logFC	pct.1	pct.2	p_val_adj	cluster
LOC108887535	3.92e-45	-0.447648	0.158	0.03	4.28e-41	1
LOC108887598	1.14e-43	-0.477904	0.157	0.031	1.24e-39	1
LOC108887536	1.2e-40	-0.515814	0.188	0.053	1.31e-36	1
LOC108877984	3.78e-34	-1.90521	0.068	0.24	4.13e-30	1
LOC108892212	1.41e-29	-1.89824	0.036	0.175	1.54e-25	1
LOC108897454	3.23e-28	-1.20731	0.061	0.211	3.53e-24	1
LOC108892211	7.56e-27	-1.42312	0.012	0.126	8.24e-23	1
dnajb1	8.51e-27	-1.5795	0.043	0.179	9.28e-23	1
LOC108873580	3.1e-26	-0.521471	0.159	0.354	3.38e-22	1
LOC108892146	1.96e-25	-0.427146	0.115	0.03	2.14e-21	1
LOC108883179	6.1e-24	-0.871235	0.086	0.235	6.65e-20	1
LOC108892190	7.08e-24	-1.37207	0.016	0.123	7.73e-20	1
cunh8orf4	1.21e-23	-0.968221	0.021	0.132	1.32e-19	1
LOC108898144	2.02e-23	-0.864965	0.018	0.126	2.2e-19	1
LOC108889716	6.07e-23	-0.644913	0.262	0.46	6.62e-19	1
LOC108889698	7.37e-23	-1.07854	0.065	0.199	8.05e-19	1
plin2	1.43e-22	-1.21382	0.033	0.146	1.56e-18	1
LOC108893370	6.44e-22	-0.986811	0.021	0.125	7.02e-18	1
LOC108892885	3.72e-21	-0.590078	0.068	0.201	4.06e-17	1
LOC108875304	1.09e-20	-1.09311	0.022	0.121	1.19e-16	1
naca	4.14e-20	-0.304384	0.25	0.46	4.52e-16	1
LOC108898190	4.5e-20	-1.37713	0.085	0.215	4.91e-16	1
ddit3	7.61e-20	-0.761399	0.042	0.153	8.3e-16	1
zfand5	2.94e-19	-0.652943	0.054	0.169	3.21e-15	1
rps26	3.06e-19	-0.36785	0.307	0.521	3.34e-15	1
LOC108898591	7.74e-19	-0.482785	0.393	0.613	8.44e-15	1
rps27a	2.37e-18	-0.369	0.328	0.531	2.59e-14	1
LOC108882674	5.04e-18	-1.35678	0.114	0.239	5.5e-14	1
LOC108893420	7.33e-18	-0.663339	0.03	0.124	7.99e-14	1
LOC108882155	8.46e-18	-0.910278	0.037	0.135	9.23e-14	1
sqstm1	9.89e-18	-0.700795	0.026	0.117	1.08e-13	1
LOC108886095	1.2e-17	-0.56684	0.027	0.119	1.31e-13	1
LOC108888880	1.36e-17	-0.472719	0.159	0.314	1.48e-13	1
rps16	1.6e-17	-0.351161	0.293	0.49	1.74e-13	1
LOC108893338	1.81e-17	-0.331689	0.227	0.409	1.98e-13	1
rpl9	3.41e-17	-0.296176	0.294	0.492	3.72e-13	1
LOC108884041	4.61e-17	-1.2665	0.039	0.133	5.03e-13	1
rps15	5.34e-17	-0.313269	0.278	0.476	5.83e-13	1
LOC108874625	6.3e-17	-0.441144	0.054	0.161	6.87e-13	1
LOC108896796	1.12e-16	-1.31858	0.105	0.221	1.22e-12	1
LOC108885716	1.18e-16	-0.681913	0.03	0.119	1.29e-12	1
rpl37	1.78e-16	-0.305107	0.29	0.487	1.94e-12	1
rpl23a	2.07e-16	-0.316604	0.215	0.389	2.26e-12	1
rpl29	3.12e-16	-0.305271	0.228	0.405	3.41e-12	1
rps28	8.55e-16	-0.288846	0.263	0.453	9.33e-12	1
ctsl	9.99e-16	-0.506506	0.058	0.16	1.09e-11	1
rps21	1.03e-15	-0.33392	0.241	0.417	1.12e-11	1
LOC108890900	1.08e-15	-0.609859	0.037	0.126	1.18e-11	1
rps5	1.1e-15	-0.275853	0.337	0.536	1.2e-11	1
fosb	1.43e-15	-1.18365	0.037	0.123	1.57e-11	1
rpsa	1.56e-15	-0.337289	0.305	0.486	1.71e-11	1
rpl14	2.07e-15	-0.298974	0.304	0.495	2.26e-11	1
rpl11	2.34e-15	-0.250402	0.359	0.564	2.56e-11	1
rpl18	3.04e-15	-0.260881	0.228	0.401	3.31e-11	1
rpl23	5.68e-15	-0.291462	0.207	0.37	6.2e-11	1
arrdc3	6.48e-15	-0.574492	0.027	0.107	7.06e-11	1
psap	8.92e-15	-0.32634	0.058	0.158	9.73e-11	1
LOC108888851	1.04e-14	-0.382703	0.285	0.455	1.14e-10	1
LOC108895929	1.18e-14	-0.509719	0.045	0.136	1.29e-10	1
metap2	1.23e-14	-0.328686	0.063	0.167	1.34e-10	1
rps14	1.34e-14	-0.261467	0.272	0.454	1.46e-10	1
tmed10	1.4e-14	-0.347754	0.034	0.119	1.53e-10	1
LOC108887430	1.94e-14	-0.463309	0.257	0.412	2.12e-10	1
rpl31	2.31e-14	-0.269681	0.341	0.538	2.52e-10	1
LOC108898305	3.55e-14	-0.837532	0.035	0.115	3.88e-10	1
LOC108881478	3.7e-14	-0.392301	0.408	0.591	4.03e-10	1
rpl37a	6.7e-14	-0.292025	0.279	0.456	7.31e-10	1
LOC108889751	9.18e-14	-0.428608	0.029	0.106	1e-09	1
LOC108903018	1.9e-13	-0.289052	0.05	0.14	2.07e-09	1
LOC108897788	2.36e-13	-0.697296	0.044	0.126	2.58e-09	1
LOC108872753	2.81e-13	-0.255025	0.294	0.471	3.07e-09	1
LOC108874907	7.12e-13	-0.42371	0.105	0.215	7.77e-09	1
LOC108887888	7.91e-13	-0.331479	0.28	0.457	8.63e-09	1
LOC108879213	9.06e-13	-0.341285	0.04	0.121	9.89e-09	1
lasp1	9.61e-13	-0.326561	0.045	0.128	1.05e-08	1
bsg	1.33e-12	-0.274486	0.06	0.15	1.45e-08	1
LOC108895835	2.11e-12	-0.365994	0.08	0.177	2.3e-08	1
rplp1	2.51e-12	-0.267521	0.325	0.505	2.74e-08	1
LOC108889058	3.5e-12	-0.284315	0.037	0.114	3.82e-08	1
LOC108873774	5.85e-12	-0.46932	0.073	0.164	6.38e-08	1
hsp90b1	9.06e-12	-0.263001	0.059	0.144	9.89e-08	1
LOC108882564	2.71e-11	-0.288706	0.039	0.112	2.96e-07	1
ubb	4.12e-11	-0.33282	0.394	0.569	4.49e-07	1
hspa5	6.77e-11	-0.453194	0.057	0.135	7.39e-07	1
tnip2	2.62e-10	-0.333626	0.048	0.119	2.85e-06	1
LOC108902662	8.92e-10	-0.274778	0.055	0.128	9.73e-06	1
LOC108876961	1.01e-09	-0.313537	0.042	0.108	1.1e-05	1
rnf5	1.02e-09	-0.277123	0.053	0.124	1.11e-05	1
donson	1.55e-09	-0.3539	0.038	0.101	1.69e-05	1
rps20	5.38e-09	-0.252213	0.368	0.52	5.87e-05	1
hspb8	6.71e-08	-0.333196	0.051	0.111	0.000731742	1
LOC108898187	1.82e-06	-0.313775	0.14	0.224	0.0198472	1
LOC108888871	9.58e-56	1.43042	0.144	0.016	1.05e-51	2
LOC108882677	8.35e-42	1.02216	0.148	0.029	9.11e-38	2
LOC108876107	6.2e-41	1.0071	0.116	0.016	6.76e-37	2
LOC108876808	4.43e-37	0.980585	0.103	0.014	4.84e-33	2
LOC108877442	6.72e-30	0.955208	0.114	0.024	7.33e-26	2
LOC108887536.1	1.79e-20	-2.10023	0.016	0.117	1.95e-16	2
LOC108884041.1	9.11e-19	-1.36588	0.03	0.133	9.94e-15	2
plin2.1	5.03e-17	-1.18351	0.04	0.139	5.49e-13	2
LOC108892212.1	1.02e-16	-1.33442	0.056	0.163	1.11e-12	2
LOC108880747	3.57e-15	-1.33581	0.028	0.115	3.89e-11	2
LOC108897788.1	2.7e-14	-0.793986	0.038	0.125	2.95e-10	2
LOC108877984.1	5.75e-13	-0.990672	0.113	0.218	6.27e-09	2
LOC108887430.1	2.78e-12	-0.40637	0.255	0.406	3.03e-08	2
LOC108883175	5.95e-12	-0.31466	0.059	0.15	6.49e-08	2
LOC108875304.1	2.01e-11	-0.883367	0.039	0.112	2.19e-07	2
LOC108892190.1	2.54e-11	-1.01032	0.039	0.111	2.77e-07	2
ubb.1	3.02e-11	-0.340193	0.39	0.564	3.3e-07	2
LOC108894165	7.82e-11	-0.331357	0.118	0.228	8.53e-07	2
lasp1.1	8.8e-11	-0.388402	0.047	0.124	9.6e-07	2
LOC108892211.1	1.54e-10	-1.03374	0.042	0.111	1.68e-06	2
LOC108893370.1	3.52e-10	-0.746432	0.044	0.113	3.84e-06	2
ctsl.1	5.07e-10	-0.383525	0.07	0.152	5.53e-06	2
LOC108895929.1	6.68e-10	-0.47809	0.055	0.129	7.28e-06	2
LOC108889698.1	5.01e-09	-0.91143	0.102	0.182	5.47e-05	2
LOC108897454.1	5.16e-09	-0.762457	0.109	0.189	5.63e-05	2
LOC108893420.1	1.39e-08	-0.456797	0.049	0.114	0.000152177	2
rnf5.1	1.51e-08	-0.34367	0.054	0.121	0.000164857	2
LOC108874625.1	2.15e-08	-0.328455	0.075	0.149	0.000234775	2
dnajb1.1	3.21e-08	-0.641818	0.086	0.159	0.000350311	2
LOC108891446	4.49e-08	-0.271296	0.057	0.123	0.000489655	2
LOC108886095.1	6.99e-08	-0.376586	0.048	0.109	0.000762416	2
sqstm1.1	1.5e-07	-0.438434	0.048	0.106	0.00163952	2
ddit3.1	2.69e-07	-0.417795	0.073	0.138	0.0029297	2
LOC108898190.1	6.59e-07	-1.01753	0.124	0.197	0.00718807	2
LOC108883179.1	2.1e-06	-0.40802	0.136	0.212	0.0228733	2
LOC108897454.2	1.34e-18	-1.58957	0.08	0.195	1.46e-14	3
LOC108892211.2	1.6e-15	-1.41202	0.025	0.114	1.75e-11	3
LOC108898144.2	3.68e-15	-0.933238	0.027	0.116	4.01e-11	3
LOC108892190.2	2.16e-14	-1.35179	0.027	0.112	2.36e-10	3
LOC108877984.2	5.4e-13	-2.08764	0.124	0.211	5.89e-09	3
LOC108898187.1	1.55e-12	-0.465036	0.318	0.165	1.69e-08	3
cunh8orf4.2	2e-12	-1.06686	0.039	0.119	2.18e-08	3
LOC108892212.2	1.46e-11	-1.94805	0.074	0.154	1.59e-07	3
LOC108898305.1	1.49e-11	-1.15855	0.036	0.109	1.63e-07	3
dnajb1.2	1.91e-09	-1.70503	0.087	0.157	2.08e-05	3
LOC108888880.1	2.21e-09	-0.357914	0.409	0.229	2.41e-05	3
LOC108893420.2	7.71e-09	-0.829946	0.049	0.112	8.41e-05	3
LOC108897788.2	5.07e-08	-0.999851	0.057	0.117	0.000553662	3
fosb.1	5.9e-08	-1.35449	0.053	0.112	0.000643944	3
LOC108887888.1	2.06e-07	-0.294659	0.593	0.352	0.00224633	3
sqstm1.2	1.52e-06	-0.736034	0.052	0.103	0.0166164	3
LOC108902968	3.02e-217	2.64136	0.344	0.007	3.29e-213	4
LOC108900055	2.93e-171	2.1495	0.281	0.007	3.2e-167	4
LOC108902978	3.68e-135	1.74455	0.202	0.002	4.01e-131	4
LOC108900068	2.84e-127	1.64554	0.2	0.003	3.1e-123	4
LOC108902969	7.26e-103	1.71741	0.153	0.001	7.92e-99	4
LOC108885716.2	1.32e-54	1.45181	0.277	0.066	1.44e-50	4
LOC108890900.2	2.47e-53	1.46561	0.285	0.072	2.69e-49	4
LOC108893657.1	1.79e-10	-0.398896	0.279	0.455	1.95e-06	4
LOC108875304.2	9.04e-10	-1.0127	0.018	0.105	9.86e-06	4
rpl7a	2.92e-09	-0.334839	0.383	0.546	3.19e-05	4
LOC108898144.3	3.29e-09	-0.750864	0.022	0.107	3.59e-05	4
rps20.1	4.85e-09	-0.361727	0.338	0.498	5.29e-05	4
zfand5.1	6.16e-09	-0.56464	0.051	0.149	6.72e-05	4
LOC108883179.2	6.29e-09	-0.735055	0.096	0.208	6.86e-05	4
LOC108888851.1	7.04e-09	-0.442059	0.281	0.426	7.68e-05	4
LOC108893370.3	7.77e-09	-0.878234	0.024	0.106	8.48e-05	4
LOC108895835.1	2.26e-08	-0.499859	0.063	0.163	0.000246602	4
LOC108887430.2	2.28e-08	-0.505149	0.246	0.387	0.000249216	4
ddit3.3	3.15e-08	-0.679843	0.045	0.133	0.000343942	4
LOC108873774.1	3.52e-08	-0.61816	0.057	0.15	0.000384034	4
rpl29.1	3.54e-08	-0.313297	0.23	0.374	0.000386158	4
fosb.2	1.18e-07	-1.11791	0.033	0.109	0.00129261	4
hspb8.1	1.27e-07	-0.540149	0.029	0.104	0.00138783	4
rpl18.1	1.38e-07	-0.288343	0.228	0.371	0.001502	4
LOC108882811	1.5e-07	-0.266216	0.34	0.5	0.00164193	4
LOC108895929.3	1.7e-07	-0.575382	0.041	0.121	0.00185874	4
plin2.3	1.83e-07	-0.942489	0.045	0.124	0.00199893	4
rps28.1	2.13e-07	-0.30151	0.273	0.419	0.00232147	4
LOC108894165.1	2.5e-07	-0.424804	0.108	0.215	0.00273269	4
LOC108882674.2	3.15e-07	-1.28122	0.122	0.216	0.00343342	4
LOC108898305.2	4.51e-07	-0.774202	0.031	0.102	0.00492458	4
gabarap	8.26e-07	-0.27199	0.075	0.167	0.00900962	4
rnasek	8.31e-07	-0.313369	0.037	0.111	0.0090653	4
LOC108896796.3	9.13e-07	-1.14588	0.11	0.2	0.00996126	4
rps29	1.73e-06	-0.253354	0.248	0.38	0.0189135	4
LOC108882155.3	1.8e-06	-0.654916	0.045	0.117	0.0196388	4
pdia3	1.97e-06	-0.274771	0.043	0.117	0.0215273	4
LOC108892885.1	1.99e-06	-0.484742	0.088	0.175	0.0216612	4
rps16.2	2.11e-06	-0.274344	0.32	0.452	0.0229797	4
LOC108889698.2	2.35e-06	-0.819164	0.088	0.173	0.0256596	4
LOC108884041.3	2.92e-06	-1.04647	0.047	0.116	0.0318742	4
rpl9.1	3.18e-06	-0.251948	0.316	0.454	0.0347337	4
slc3a2	3.48e-06	-0.356254	0.073	0.154	0.0380119	4
plin2.4	0	2.89245	0.707	0.049	0	5
LOC108892190.3	0	2.77601	0.63	0.034	0	5
LOC108897454.3	0	2.62138	0.876	0.091	0	5
LOC108884476	0	2.29627	0.558	0.014	0	5
LOC108898144.4	0	2.21988	0.66	0.034	0	5
LOC108888247	1.44e-301	2.16481	0.541	0.019	1.57e-297	5
igflr1	1.88e-300	2.14724	0.456	0.006	2.05e-296	5
LOC108884041.4	1.09e-296	3.0552	0.655	0.047	1.19e-292	5
LOC108892212.3	1.43e-296	3.16545	0.74	0.07	1.56e-292	5
cd63	6.56e-292	2.05741	0.514	0.016	7.15e-288	5
LOC108892211.3	4.38e-290	2.73508	0.613	0.036	4.77e-286	5
dnajb1.4	5.33e-290	2.90183	0.749	0.074	5.81e-286	5
LOC108888080	4.85e-284	2.09727	0.525	0.02	5.29e-280	5
cunh8orf4.4	2.86e-280	2.18925	0.633	0.042	3.12e-276	5
LOC108893370.4	2e-277	2.47125	0.605	0.04	2.18e-273	5
LOC108875252	1.68e-271	1.84392	0.406	0.005	1.83e-267	5
LOC108877984.3	2.89e-267	2.89643	0.823	0.122	3.16e-263	5
LOC108897788.4	5.11e-267	2.31733	0.624	0.046	5.58e-263	5
cunh15orf48	6.86e-258	2.08096	0.456	0.014	7.49e-254	5
clic2	8.82e-256	1.98971	0.436	0.012	9.63e-252	5
LOC108893420.4	2.09e-251	2.00739	0.597	0.043	2.29e-247	5
LOC108875304.3	6.57e-241	2.61594	0.561	0.042	7.16e-237	5
sqstm1.3	2.94e-237	1.99756	0.558	0.04	3.2e-233	5
LOC108891060	4.45e-233	1.90111	0.356	0.005	4.86e-229	5
ddit3.4	2.76e-231	2.1086	0.638	0.065	3.01e-227	5
LOC108902570	2.05e-230	2.26339	0.42	0.015	2.23e-226	5
LOC108876891	1.41e-229	1.65252	0.354	0.005	1.54e-225	5
LOC108883179.3	3e-229	2.23099	0.787	0.128	3.28e-225	5
LOC108894291	3.39e-223	1.59082	0.403	0.013	3.7e-219	5
LOC108898280	2.88e-222	2.00525	0.406	0.014	3.14e-218	5
LOC108878374	5.46e-222	3.01743	0.481	0.029	5.95e-218	5
LOC108899350	1.98e-220	2.26568	0.439	0.02	2.15e-216	5
LOC108899242	9.38e-220	2.17775	0.417	0.017	1.02e-215	5
LOC108880419	1.39e-218	1.63633	0.448	0.021	1.51e-214	5
LOC108875625	5.5e-217	1.47439	0.37	0.009	6e-213	5
LOC108886122	2.63e-216	2.01988	0.39	0.013	2.87e-212	5
LOC108886827	5.56e-216	1.78333	0.381	0.011	6.06e-212	5
anxa1	1.15e-214	1.69798	0.381	0.011	1.25e-210	5
LOC108895195	9.83e-212	1.52955	0.378	0.011	1.07e-207	5
LOC108889698.3	1.42e-209	2.6589	0.688	0.104	1.55e-205	5
LOC108896929	2.59e-209	1.62275	0.459	0.026	2.83e-205	5
LOC108895929.4	2.12e-208	1.88271	0.586	0.058	2.31e-204	5
calm1	8.81e-208	1.60739	0.417	0.019	9.61e-204	5
LOC108878560	1.64e-207	1.55393	0.337	0.007	1.79e-203	5
LOC108886893	2.46e-207	1.41841	0.326	0.005	2.69e-203	5
LOC108881901	3.77e-205	1.41418	0.351	0.009	4.12e-201	5
LOC108892502	1.09e-204	1.32393	0.312	0.004	1.19e-200	5
LOC108884300	1.59e-204	1.65188	0.356	0.01	1.74e-200	5
LOC108880674	2.9e-204	1.97952	0.354	0.01	3.17e-200	5
LOC108883202	9.75e-203	1.79101	0.329	0.006	1.06e-198	5
LOC108891242	2.15e-202	1.43982	0.417	0.02	2.34e-198	5
hic1	3.19e-202	1.69835	0.39	0.015	3.49e-198	5
LOC108886019	1.33e-201	1.59146	0.329	0.007	1.45e-197	5
LOC108896796.4	3.94e-198	2.77707	0.724	0.13	4.3e-194	5
LOC108881902	6.09e-197	1.55378	0.42	0.022	6.64e-193	5
LOC108898305.3	1.16e-196	2.19221	0.522	0.045	1.27e-192	5
LOC108893706	3.81e-196	1.59908	0.425	0.023	4.16e-192	5
LOC108880956	5.59e-196	1.73615	0.359	0.012	6.09e-192	5
LOC108885992	4.46e-195	1.61393	0.37	0.014	4.87e-191	5
LOC108902153	4.78e-194	1.74371	0.395	0.019	5.22e-190	5
LOC108877660	1.47e-192	1.70067	0.376	0.015	1.6e-188	5
LOC108901887	2.88e-191	1.53277	0.398	0.019	3.14e-187	5
LOC108874072	1.29e-189	1.90021	0.392	0.02	1.4e-185	5
xbp1	4.19e-188	1.68972	0.459	0.033	4.57e-184	5
fosb.3	1.13e-186	2.53751	0.522	0.052	1.24e-182	5
sat1	3.69e-186	1.44437	0.434	0.027	4.02e-182	5
LOC108882155.4	5.01e-184	2.18502	0.544	0.06	5.46e-180	5
LOC108885549	2.28e-182	-0.799337	1	1	2.48e-178	5
LOC108887017	3.68e-182	1.26278	0.298	0.006	4.02e-178	5
LOC108880701	4.39e-182	1.40663	0.323	0.009	4.79e-178	5
LOC108887325	6.42e-179	1.71772	0.304	0.008	7e-175	5
cd83	2.37e-178	1.75376	0.304	0.008	2.58e-174	5
pmp22	4.28e-178	1.76568	0.337	0.012	4.67e-174	5
LOC108902264	3.74e-176	-0.848993	1	1	4.09e-172	5
LOC108888365	4.58e-176	1.63803	0.312	0.009	5e-172	5
chd2	9.55e-176	1.4573	0.395	0.023	1.04e-171	5
LOC108886830	1.55e-175	1.48181	0.348	0.015	1.69e-171	5
LOC108890896	1.13e-174	1.30632	0.309	0.009	1.23e-170	5
LOC108899365	4.7e-174	1.29743	0.32	0.011	5.12e-170	5
LOC108890483	6.11e-173	1.64008	0.395	0.024	6.67e-169	5
LOC108877701	2.49e-172	1.59358	0.271	0.004	2.72e-168	5
LOC108884389	2.76e-172	1.35228	0.348	0.015	3.01e-168	5
LOC108881933	8.13e-172	1.49088	0.345	0.015	8.87e-168	5
LOC108898190.3	1.51e-171	3.00008	0.66	0.125	1.65e-167	5
LOC108876797	5.58e-171	-0.775472	1	1	6.09e-167	5
LOC108893858	1.43e-170	1.41446	0.323	0.012	1.56e-166	5
LOC108884063	2.93e-169	1.34667	0.29	0.007	3.19e-165	5
eno1	4.84e-169	1.60703	0.401	0.027	5.28e-165	5
LOC108883954	2.57e-168	1.21233	0.285	0.007	2.8e-164	5
LOC108890804	4.49e-168	1.2597	0.271	0.005	4.9e-164	5
selenop	6.18e-167	1.847	0.39	0.025	6.74e-163	5
LOC108898491	2.22e-166	1.29676	0.271	0.005	2.42e-162	5
LOC108885551	1.33e-165	-0.8669	1	1	1.45e-161	5
LOC108875388	3.52e-165	1.52819	0.323	0.013	3.84e-161	5
fcer1g	1.48e-164	1.32311	0.268	0.005	1.62e-160	5
bag3	2.2e-164	1.50151	0.318	0.012	2.4e-160	5
LOC108896630	5.71e-164	2.23649	0.326	0.014	6.23e-160	5
LOC108879818	2.13e-163	1.45346	0.235	0.002	2.33e-159	5
cd48	5.17e-163	1.12691	0.24	0.002	5.64e-159	5
LOC108901279	1.76e-162	1.57661	0.409	0.031	1.92e-158	5
cunh19orf24	8.86e-161	1.36324	0.331	0.015	9.67e-157	5
LOC108889691	7.15e-160	1.57106	0.265	0.006	7.8e-156	5
cunh3orf70	7.97e-160	1.27994	0.282	0.008	8.69e-156	5
LOC108891972	5.93e-159	1.34314	0.337	0.017	6.47e-155	5
zfand5.2	2.25e-158	1.62717	0.588	0.086	2.45e-154	5
LOC108884182	4.75e-158	1.51916	0.251	0.004	5.19e-154	5
LOC108885907	5.56e-158	1.28302	0.309	0.012	6.07e-154	5
LOC108900877	6.03e-158	1.30436	0.257	0.005	6.58e-154	5
LOC108894950	4.27e-157	1.33367	0.329	0.016	4.66e-153	5
LOC108888881	1.01e-156	1.86149	0.254	0.005	1.1e-152	5
LOC108896140	1.02e-156	1.40219	0.315	0.014	1.12e-152	5
LOC108894818	1.92e-155	1.27541	0.246	0.004	2.1e-151	5
LOC108886095.2	1.57e-154	1.62631	0.475	0.051	1.72e-150	5
LOC108896845	8.9e-154	1.56835	0.285	0.01	9.71e-150	5
LOC108876469	2.08e-153	1.12238	0.296	0.011	2.27e-149	5
LOC108879513	1.94e-150	1.29091	0.312	0.015	2.11e-146	5
LOC108898905	4.64e-150	1.418	0.318	0.016	5.06e-146	5
arrdc3.1	5.94e-150	1.50973	0.448	0.045	6.48e-146	5
LOC108882674.3	2.34e-149	2.73469	0.66	0.154	2.55e-145	5
LOC108882916	6.94e-149	1.04314	0.235	0.004	7.58e-145	5
LOC108897373	7.71e-149	1.09823	0.276	0.009	8.41e-145	5
dsp	1.01e-148	1.50301	0.334	0.019	1.1e-144	5
LOC108898286	1.06e-148	1.28632	0.271	0.008	1.16e-144	5
LOC108884312	3.38e-148	1.26468	0.293	0.012	3.69e-144	5
LOC108887155	7.42e-148	-0.819759	0.992	1	8.09e-144	5
LOC108878156	2.17e-147	1.14989	0.238	0.004	2.37e-143	5
LOC108902262	3.36e-147	-0.862082	0.997	1	3.67e-143	5
sh3bgrl	6.84e-147	1.03669	0.229	0.003	7.47e-143	5
LOC108877451	1.27e-146	1.14644	0.224	0.003	1.38e-142	5
LOC108879839	1.96e-146	1.02441	0.215	0.002	2.14e-142	5
LOC108888180	2.9e-144	1.45998	0.323	0.019	3.16e-140	5
LOC108892620	3.07e-144	1.02964	0.218	0.002	3.34e-140	5
LOC108902734	1.23e-143	1.00923	0.24	0.005	1.35e-139	5
LOC108895972	1.55e-143	1.32495	0.345	0.023	1.69e-139	5
LOC108898657	1e-142	1.42926	0.24	0.005	1.09e-138	5
hif1a	1.57e-142	1.11233	0.293	0.013	1.71e-138	5
pxk	5.17e-142	1.10287	0.279	0.011	5.65e-138	5
LOC108879330	3.1e-141	1.26439	0.229	0.004	3.38e-137	5
LOC108882950	1.64e-140	0.892899	0.202	0.001	1.79e-136	5
LOC108883699	2.75e-140	1.4173	0.381	0.033	3e-136	5
LOC108888429	4.7e-140	1.13036	0.271	0.01	5.13e-136	5
LOC108901353	6.5e-140	1.3522	0.359	0.027	7.09e-136	5
LOC108880957	3.33e-139	1.39912	0.367	0.029	3.64e-135	5
LOC108884955	4.4e-139	1.15653	0.304	0.016	4.8e-135	5
ctsl.3	5.96e-139	1.6698	0.544	0.086	6.51e-135	5
LOC108893210	1.55e-138	0.972107	0.21	0.002	1.69e-134	5
LOC108893387	4.22e-138	1.12541	0.265	0.01	4.6e-134	5
LOC108889716.2	7.2e-138	1.57716	0.881	0.352	7.86e-134	5
LOC108885292	2.1e-137	1.22832	0.318	0.019	2.29e-133	5
LOC108899455	2.54e-137	1.27252	0.271	0.011	2.77e-133	5
LOC108878644	2.62e-137	1.62953	0.39	0.036	2.86e-133	5
LOC108902191	4.62e-137	1.20193	0.249	0.008	5.04e-133	5
LOC108900921	1.03e-136	0.950334	0.213	0.003	1.13e-132	5
LOC108878549	3.82e-136	1.02671	0.213	0.003	4.17e-132	5
LOC108887430.3	7.44e-136	1.72684	0.837	0.317	8.11e-132	5
tnip1	9.02e-135	1.3025	0.343	0.025	9.85e-131	5
LOC108877912	1.45e-134	0.933695	0.207	0.003	1.59e-130	5
LOC108888849	5.2e-134	1.04517	0.254	0.009	5.67e-130	5
LOC108891879	5.64e-134	1.27571	0.318	0.021	6.16e-130	5
LOC108874625.2	1.6e-133	1.4649	0.539	0.086	1.74e-129	5
LOC108884881	1.98e-133	1.05793	0.276	0.013	2.16e-129	5
LOC108880499	3.01e-133	1.24795	0.285	0.014	3.29e-129	5
LOC108888166	3.18e-133	1.02464	0.232	0.006	3.47e-129	5
LOC108878458	1.57e-132	1.03817	0.204	0.003	1.71e-128	5
atp1b1	5.41e-132	1.1284	0.249	0.009	5.9e-128	5
anxa10	1.08e-131	1.22845	0.312	0.02	1.18e-127	5
LOC108888398	8.04e-130	1.3558	0.362	0.032	8.77e-126	5
LOC108873580.1	2.82e-129	1.4191	0.798	0.244	3.08e-125	5
plekhg5	2.94e-129	1.14708	0.262	0.011	3.21e-125	5
LOC108889322	4.16e-129	1.26228	0.251	0.01	4.53e-125	5
LOC108884343	4.21e-129	1.13811	0.279	0.015	4.59e-125	5
LOC108889923	1.54e-127	-0.823326	0.994	0.996	1.67e-123	5
LOC108882209	2.84e-127	1.08016	0.21	0.004	3.1e-123	5
tagap	8.66e-127	1.08143	0.21	0.004	9.44e-123	5
LOC108883426	2.81e-126	0.984595	0.246	0.009	3.06e-122	5
ugcg	6.42e-126	1.27809	0.401	0.044	7.01e-122	5
susd6	1.3e-125	1.06849	0.221	0.006	1.42e-121	5
LOC108880423	8.29e-125	1.20862	0.262	0.013	9.05e-121	5
LOC108900372	3.48e-124	1.12405	0.282	0.016	3.8e-120	5
pfkfb3	1.14e-123	1.36728	0.304	0.021	1.24e-119	5
LOC108875663	1.44e-123	1.1631	0.318	0.023	1.57e-119	5
LOC108898063	6.21e-123	-0.727223	0.994	0.999	6.77e-119	5
LOC108901929	7.78e-123	2.2861	0.315	0.025	8.49e-119	5
fmnl3	9.73e-123	1.01116	0.213	0.005	1.06e-118	5
LOC108890413	3.47e-122	1.45824	0.232	0.008	3.78e-118	5
LOC108890765	3.87e-122	1.40011	0.207	0.005	4.23e-118	5
LOC108890752	6.96e-122	1.02297	0.207	0.005	7.6e-118	5
mxd4	1.3e-121	1.20729	0.24	0.01	1.42e-117	5
LOC108897216	1.53e-121	1.24652	0.343	0.031	1.67e-117	5
cdc42se1	2.69e-121	0.891868	0.204	0.005	2.93e-117	5
ist1	4.82e-121	1.18515	0.387	0.042	5.25e-117	5
LOC108890809	2.96e-120	1.14923	0.188	0.003	3.23e-116	5
LOC108900375	5.47e-120	0.903799	0.232	0.009	5.97e-116	5
cast	7.19e-120	1.01768	0.254	0.012	7.85e-116	5
LOC108873824	8.78e-120	1.07336	0.243	0.011	9.57e-116	5
LOC108892885.2	1.01e-119	1.70864	0.572	0.119	1.1e-115	5
atxn1	1.73e-119	1.01229	0.204	0.005	1.89e-115	5
dab2	3.06e-119	1.29589	0.326	0.028	3.34e-115	5
LOC108875477	5.33e-119	1.00219	0.213	0.006	5.82e-115	5
LOC108891446.2	6.78e-119	1.26281	0.464	0.067	7.4e-115	5
LOC108878417	7.04e-119	1.34939	0.235	0.01	7.68e-115	5
LOC108898875	8.82e-119	1.03966	0.262	0.014	9.62e-115	5
ahnak	9.05e-119	1.5425	0.376	0.041	9.87e-115	5
LOC108893807	1.77e-118	-0.770363	0.989	0.997	1.93e-114	5
ca6	4.79e-118	1.02712	0.177	0.002	5.23e-114	5
LOC108900844	4.97e-118	1.3033	0.265	0.015	5.42e-114	5
LOC108888842	1.5e-117	0.912871	0.221	0.008	1.63e-113	5
LOC108892179	2.14e-117	0.840412	0.21	0.006	2.33e-113	5
fabp1	6.65e-117	-0.719783	0.994	0.999	7.26e-113	5
LOC108897787	6.53e-116	0.978921	0.177	0.002	7.12e-112	5
LOC108895867	1.05e-114	0.885505	0.188	0.004	1.15e-110	5
LOC108891494	2.63e-114	0.919933	0.182	0.003	2.87e-110	5
LOC108886775	2.56e-113	1.43988	0.331	0.031	2.79e-109	5
LOC108889751.1	4.95e-113	1.1754	0.401	0.05	5.4e-109	5
LOC108901118	1.67e-112	0.868538	0.182	0.003	1.82e-108	5
tnfaip3	2.2e-112	1.01297	0.227	0.01	2.4e-108	5
LOC108900816	7.04e-112	-0.752939	0.978	0.996	7.68e-108	5
lasp1.2	2.71e-111	1.31214	0.448	0.067	2.96e-107	5
LOC108882564.1	5.98e-111	1.19715	0.414	0.056	6.53e-107	5
ripk2	1.04e-110	0.941826	0.221	0.009	1.13e-106	5
LOC108891113	1.61e-110	0.942782	0.18	0.003	1.75e-106	5
LOC108890344	1.73e-110	0.738803	0.152	0	1.88e-106	5
LOC108899045	2.19e-110	0.964044	0.21	0.008	2.39e-106	5
irf2bp2	5.22e-110	1.24052	0.32	0.03	5.69e-106	5
crip1	1.9e-109	1.40793	0.227	0.011	2.07e-105	5
LOC108895270	4.1e-109	0.898608	0.196	0.006	4.48e-105	5
LOC108897073	4.9e-109	1.84848	0.348	0.039	5.34e-105	5
ier2	5.58e-109	1.04982	0.246	0.014	6.08e-105	5
LOC108889129	5.7e-109	0.887071	0.215	0.009	6.22e-105	5
ptgis	8.45e-108	1.29084	0.163	0.002	9.22e-104	5
LOC108883700	1.07e-107	0.970135	0.215	0.009	1.17e-103	5
LOC108888851.2	3.5e-107	1.26599	0.843	0.359	3.81e-103	5
LOC108892329	8.26e-107	1.02621	0.177	0.004	9.01e-103	5
LOC108881478.2	1.99e-106	1.21247	0.903	0.5	2.17e-102	5
slk	2.92e-106	1.15834	0.202	0.007	3.19e-102	5
LOC108877714	4.98e-106	0.780435	0.169	0.003	5.43e-102	5
LOC108884598	9.33e-106	0.789168	0.163	0.002	1.02e-101	5
LOC108877836	3.28e-105	0.818076	0.177	0.004	3.58e-101	5
mafk	4.67e-105	0.902949	0.215	0.01	5.1e-101	5
rnf24	1.19e-104	0.864214	0.202	0.008	1.3e-100	5
pkp3	1.6e-104	1.18522	0.276	0.022	1.75e-100	5
LOC108883659	1.65e-104	1.29863	0.215	0.01	1.8e-100	5
cfp	1.07e-103	0.749638	0.152	0.001	1.17e-99	5
rap2b	4.97e-103	1.17088	0.312	0.031	5.43e-99	5
LOC108893481	8.64e-103	0.870249	0.207	0.009	9.42e-99	5
LOC108888956	1.71e-102	0.957541	0.301	0.028	1.87e-98	5
LOC108893209	2.3e-102	0.996852	0.166	0.003	2.5e-98	5
LOC108895835.2	2.44e-102	1.37446	0.528	0.108	2.66e-98	5
lrrc8a	2.81e-102	0.792235	0.166	0.003	3.06e-98	5
itm2b	3.54e-102	1.09687	0.318	0.033	3.86e-98	5
LOC108887432	4.16e-102	0.774788	0.144	0.001	4.54e-98	5
LOC108880283	8.76e-102	0.766606	0.152	0.002	9.56e-98	5
pla2g6	1.03e-101	0.673322	0.155	0.002	1.12e-97	5
LOC108875476	1.2e-101	0.895675	0.207	0.009	1.31e-97	5
LOC108899251	1.29e-101	1.72695	0.191	0.007	1.4e-97	5
LOC108888912	1.55e-101	1.27078	0.182	0.005	1.69e-97	5
sidt2	2.82e-101	1.11769	0.287	0.025	3.08e-97	5
LOC108886862	1.28e-100	0.906322	0.18	0.005	1.39e-96	5
LOC108876224	1.35e-100	0.880289	0.188	0.006	1.47e-96	5
fosl1	1.61e-100	1.08877	0.26	0.019	1.76e-96	5
capg	1.85e-100	0.91958	0.166	0.003	2.02e-96	5
irf8	2.09e-100	0.807018	0.18	0.005	2.28e-96	5
LOC108876700	4.41e-100	0.901174	0.177	0.005	4.81e-96	5
LOC108875953	4.96e-100	0.785494	0.16	0.003	5.41e-96	5
donson.1	7.76e-100	1.48657	0.373	0.052	8.47e-96	5
LOC108877292	1.16e-99	1.02584	0.243	0.016	1.27e-95	5
tnip2.2	3.08e-99	1.37384	0.414	0.065	3.36e-95	5
LOC108887763	6.9e-99	0.816234	0.18	0.005	7.53e-95	5
fam65a	7.74e-99	0.89214	0.232	0.014	8.44e-95	5
LOC108884387	1.29e-98	1.15767	0.251	0.018	1.41e-94	5
LOC108882345	4.09e-98	0.835694	0.157	0.003	4.47e-94	5
cebpa	4.24e-98	1.04877	0.196	0.008	4.62e-94	5
nfkbia	6.74e-98	1.21107	0.367	0.049	7.35e-94	5
LOC108895964	8.85e-98	0.8743	0.171	0.005	9.66e-94	5
LOC108884372	9.58e-98	0.977823	0.215	0.011	1.05e-93	5
LOC108887276	9.67e-98	0.979103	0.315	0.034	1.06e-93	5
nrros	1.21e-97	0.695272	0.144	0.001	1.32e-93	5
LOC108895611	1.36e-97	1.92612	0.354	0.047	1.48e-93	5
rnf5.3	1.49e-97	1.37454	0.423	0.069	1.63e-93	5
mafb	3.49e-97	0.997266	0.218	0.012	3.81e-93	5
LOC108880947	1.03e-96	0.886296	0.202	0.009	1.12e-92	5
fnbp1	2.39e-96	1.06448	0.171	0.005	2.6e-92	5
prkar1a	5.25e-96	1.05236	0.229	0.015	5.73e-92	5
LOC108883464	6.65e-96	0.811128	0.169	0.005	7.25e-92	5
LOC108879218	7.99e-96	0.890863	0.177	0.006	8.71e-92	5
prr13	1.05e-95	1.06463	0.298	0.031	1.14e-91	5
LOC108880695	1.19e-95	0.844534	0.235	0.016	1.3e-91	5
mef2c	1.23e-95	0.759051	0.144	0.002	1.34e-91	5
acp5	1.66e-95	-0.750445	0.942	0.983	1.82e-91	5
soat1	1.25e-94	0.797973	0.171	0.005	1.36e-90	5
LOC108893655	2.42e-94	0.825733	0.196	0.009	2.64e-90	5
gnb4	2.68e-94	0.885116	0.196	0.009	2.93e-90	5
hamp	2.85e-94	1.26099	0.166	0.005	3.11e-90	5
LOC108887427	3.44e-94	0.862489	0.185	0.007	3.75e-90	5
LOC108892328	3.71e-94	0.789802	0.152	0.003	4.05e-90	5
LOC108882842	4.11e-94	1.33031	0.238	0.017	4.49e-90	5
klf3	8.37e-94	0.726627	0.166	0.005	9.13e-90	5
LOC108898022	9.84e-94	0.674172	0.135	0.001	1.07e-89	5
LOC108898741	1.78e-93	0.900627	0.257	0.021	1.94e-89	5
fosl2	2.16e-93	1.07184	0.232	0.016	2.35e-89	5
LOC108879213.1	2.43e-93	1.07398	0.406	0.064	2.65e-89	5
LOC108883175.1	3.31e-93	1.19892	0.467	0.09	3.61e-89	5
LOC108882154	3.49e-93	0.758348	0.171	0.005	3.8e-89	5
serpine1	3.97e-93	1.04817	0.171	0.005	4.34e-89	5
socs3	1.09e-92	1.16792	0.323	0.039	1.19e-88	5
LOC108885100	3.07e-92	0.797132	0.152	0.003	3.34e-88	5
LOC108880702	3.8e-92	0.825581	0.127	0	4.15e-88	5
dusp1	3.94e-92	1.14534	0.279	0.028	4.3e-88	5
ets1	6.77e-92	1.06576	0.249	0.02	7.39e-88	5
LOC108902783	8.96e-92	0.73368	0.144	0.002	9.77e-88	5
LOC108893332	1.28e-91	0.69058	0.133	0.001	1.4e-87	5
LOC108881450	1.36e-91	0.684734	0.144	0.002	1.48e-87	5
LOC108878340	2.8e-91	0.922541	0.169	0.005	3.06e-87	5
LOC108896797	2.92e-91	0.928503	0.188	0.008	3.19e-87	5
mknk1	1.38e-90	1.13008	0.318	0.039	1.5e-86	5
cd164	2.01e-90	1.10164	0.307	0.035	2.2e-86	5
rgl1	2.15e-90	0.95627	0.207	0.012	2.34e-86	5
LOC108898591.1	2.23e-90	1.45577	0.865	0.516	2.44e-86	5
hspa5.2	2.34e-90	1.54697	0.425	0.078	2.55e-86	5
zc3h12d	8.8e-90	0.91349	0.138	0.002	9.6e-86	5
LOC108883890	1.24e-89	0.610022	0.144	0.002	1.35e-85	5
riok3	5.36e-89	0.959531	0.246	0.021	5.85e-85	5
LOC108882336	9.26e-89	1.01994	0.149	0.003	1.01e-84	5
LOC108882528	1.35e-88	0.867625	0.149	0.003	1.47e-84	5
LOC108874752	2.08e-88	0.551604	0.119	0	2.27e-84	5
LOC108902089	3.09e-88	0.698727	0.169	0.006	3.37e-84	5
rps20.2	3.57e-88	1.12798	0.856	0.435	3.89e-84	5
calcoco2	3.85e-88	0.856276	0.18	0.008	4.2e-84	5
dapp1	4.41e-88	0.598212	0.122	0	4.82e-84	5
LOC108896123	5.28e-88	-0.701412	0.953	0.981	5.76e-84	5
il17rel	6.21e-88	0.909031	0.157	0.005	6.77e-84	5
was	9.17e-88	0.745447	0.135	0.002	1e-83	5
LOC108875012	1.02e-87	1.03712	0.155	0.004	1.11e-83	5
LOC108891948	1.16e-87	0.663898	0.127	0.001	1.27e-83	5
LOC108873774.2	1.56e-87	1.59404	0.47	0.102	1.7e-83	5
ctsk	1.9e-87	0.764179	0.135	0.002	2.08e-83	5
hopx	9.42e-87	0.810161	0.146	0.003	1.03e-82	5
btf3	1.14e-86	1.07303	0.47	0.095	1.24e-82	5
LOC108900162	1.36e-86	0.786047	0.18	0.008	1.49e-82	5
LOC108898128	1.84e-86	0.900603	0.243	0.021	2.01e-82	5
LOC108873687	2.8e-86	0.92302	0.251	0.023	3.05e-82	5
LOC108902582	3.57e-86	0.85058	0.191	0.01	3.9e-82	5
LOC108872472	7.18e-86	1.03832	0.282	0.031	7.83e-82	5
LOC108891849	1.49e-85	0.627898	0.124	0.001	1.63e-81	5
kiaa0040	1.64e-85	0.69255	0.13	0.002	1.79e-81	5
nfkbie	1.78e-85	0.933725	0.229	0.018	1.95e-81	5
LOC108881496	3.36e-85	0.823231	0.196	0.011	3.66e-81	5
LOC108874500	4.2e-85	0.866005	0.157	0.005	4.58e-81	5
LOC108876160	9.81e-85	0.77629	0.144	0.003	1.07e-80	5
myh9	1.82e-84	1.01816	0.298	0.036	1.98e-80	5
LOC108896590	5.03e-84	1.27328	0.45	0.093	5.49e-80	5
LOC108887577	7.79e-84	-0.72747	0.934	0.967	8.5e-80	5
LOC108872545	8.2e-84	1.19588	0.119	0.001	8.95e-80	5
LOC108893338.1	1.05e-83	1.20141	0.762	0.313	1.15e-79	5
pdia3.1	1.81e-83	1.03799	0.409	0.074	1.97e-79	5
LOC108883273	2.18e-83	0.798147	0.18	0.009	2.38e-79	5
LOC108889058.1	3.64e-83	1.06299	0.373	0.061	3.97e-79	5
pgk1	7.38e-83	0.947101	0.279	0.032	8.05e-79	5
ptgs2	9.77e-83	1.19076	0.229	0.019	1.07e-78	5
rpl23a.2	1.5e-82	1.10316	0.751	0.295	1.64e-78	5
LOC108897156	2.03e-82	0.896563	0.199	0.013	2.21e-78	5
ubb.2	2.16e-82	1.34479	0.848	0.484	2.36e-78	5
gmnn	5.49e-82	-0.65943	0.972	0.989	5.99e-78	5
slc35f6	1.5e-81	0.688762	0.124	0.002	1.64e-77	5
rpl37a.2	1.57e-81	1.09116	0.804	0.362	1.71e-77	5
LOC108879443	1.6e-81	0.983062	0.185	0.011	1.74e-77	5
LOC108902016	1.68e-81	0.581508	0.127	0.002	1.83e-77	5
arg2	2.02e-81	0.759639	0.144	0.004	2.21e-77	5
LOC108875713	2.65e-81	1.04684	0.304	0.04	2.89e-77	5
LOC108885560	3.39e-81	0.847819	0.141	0.004	3.7e-77	5
LOC108890421	7.51e-81	1.08799	0.279	0.033	8.2e-77	5
LOC108896043	1.43e-80	0.757429	0.138	0.003	1.57e-76	5
LOC108877297	1.59e-80	0.983816	0.18	0.01	1.73e-76	5
LOC108876961.1	3.21e-80	1.1999	0.359	0.06	3.5e-76	5
LOC108878403	3.51e-80	0.9282	0.218	0.018	3.83e-76	5
dusp5	3.53e-80	0.711705	0.146	0.005	3.85e-76	5
steap4	6.04e-80	0.922032	0.152	0.005	6.59e-76	5
pgm2	6.36e-80	0.714432	0.171	0.008	6.94e-76	5
cyld	1.05e-79	0.727414	0.157	0.006	1.15e-75	5
LOC108899610	1.39e-79	0.749409	0.169	0.008	1.51e-75	5
LOC108885293	1.47e-79	0.902493	0.202	0.015	1.6e-75	5
LOC108874725	1.72e-79	0.583453	0.116	0.001	1.88e-75	5
LOC108897704	1.89e-79	0.837155	0.141	0.004	2.06e-75	5
LOC108874450	7.43e-79	0.796386	0.18	0.01	8.11e-75	5
rps16.3	8.71e-79	1.03638	0.809	0.393	9.51e-75	5
LOC108901614	1.05e-78	-0.776293	0.881	0.953	1.14e-74	5
LOC108875606	1.6e-78	1.08091	0.296	0.04	1.74e-74	5
LOC108900060	2.5e-78	1.08883	0.323	0.048	2.73e-74	5
cmip	3.04e-78	0.617963	0.133	0.003	3.32e-74	5
wsb1	3.12e-78	0.820487	0.207	0.016	3.4e-74	5
ctsz	5.58e-78	1.0336	0.307	0.043	6.09e-74	5
LOC108874907.3	5.81e-78	1.43512	0.533	0.145	6.33e-74	5
LOC108895688	9.45e-78	1.2607	0.265	0.031	1.03e-73	5
grk6	1.06e-77	0.751998	0.18	0.011	1.16e-73	5
wbp2nl	1.13e-77	0.816084	0.262	0.03	1.23e-73	5
LOC108896045	1.39e-77	0.807437	0.138	0.004	1.51e-73	5
LOC108882204	1.77e-77	0.759171	0.113	0.001	1.93e-73	5
LOC108880551	1.89e-77	0.563579	0.116	0.001	2.06e-73	5
purb	1.03e-76	0.869091	0.21	0.017	1.12e-72	5
LOC108887220	1.57e-76	0.881303	0.199	0.015	1.72e-72	5
rap1b	1.6e-76	0.689149	0.141	0.005	1.74e-72	5
LOC108883812	2.27e-76	0.811559	0.149	0.006	2.47e-72	5
fam13a	2.93e-76	1.05187	0.18	0.011	3.2e-72	5
LOC108874022	6.19e-76	0.790052	0.182	0.012	6.75e-72	5
hsp90b1.2	7.09e-76	1.14366	0.42	0.087	7.74e-72	5
rpsa.1	1.1e-75	1.06715	0.807	0.394	1.2e-71	5
jak1	1.22e-75	0.851984	0.185	0.012	1.33e-71	5
rpl14.1	1.3e-75	1.00336	0.82	0.399	1.42e-71	5
LOC108875822	1.46e-75	0.866403	0.119	0.002	1.59e-71	5
LOC108893516	1.56e-75	0.911535	0.16	0.008	1.71e-71	5
LOC108898440	1.99e-75	0.852867	0.149	0.006	2.17e-71	5
LOC108897750	2.01e-75	0.578711	0.113	0.001	2.2e-71	5
LOC108884309	2.09e-75	0.794909	0.113	0.001	2.28e-71	5
LOC108882203	2.11e-75	0.959713	0.133	0.004	2.3e-71	5
LOC108885593	3.51e-75	0.762849	0.133	0.004	3.83e-71	5
LOC108882779	8.26e-75	0.728699	0.157	0.008	9.02e-71	5
LOC108896640	8.28e-75	0.662687	0.13	0.003	9.03e-71	5
LOC108891618	3.81e-74	0.660416	0.135	0.004	4.16e-70	5
LOC108884044	2.44e-73	0.655866	0.171	0.01	2.66e-69	5
LOC108888880.3	4.94e-73	1.42535	0.619	0.232	5.39e-69	5
LOC108900725	6.43e-73	0.834583	0.221	0.021	7.01e-69	5
LOC108892481	6.49e-73	0.706139	0.144	0.006	7.08e-69	5
LOC108886595	7.46e-73	-0.742818	0.859	0.95	8.14e-69	5
LOC108889306	1.13e-72	0.979408	0.251	0.03	1.23e-68	5
LOC108879231	1.5e-72	0.747217	0.135	0.005	1.63e-68	5
LOC108886627	3.67e-72	0.628378	0.122	0.003	4.01e-68	5
rpl28.1	3.78e-72	0.973393	0.782	0.352	4.12e-68	5
cunh10orf54	4.03e-72	0.699938	0.133	0.004	4.39e-68	5
LOC108879142	4.34e-72	1.16449	0.24	0.027	4.74e-68	5
ptprc	6.21e-72	0.621134	0.119	0.002	6.78e-68	5
LOC108891054	6.45e-72	0.750875	0.191	0.015	7.04e-68	5
LOC108872600	7.13e-72	0.796628	0.171	0.011	7.78e-68	5
LOC108873746	1.01e-71	0.845324	0.243	0.028	1.1e-67	5
arid5a	1.47e-71	0.653031	0.11	0.002	1.6e-67	5
btg1	2.23e-71	1.0218	0.657	0.233	2.43e-67	5
LOC108895612	3.28e-71	0.998999	0.152	0.008	3.58e-67	5
LOC108886370	5.12e-71	0.702503	0.146	0.007	5.58e-67	5
rps28.2	1.28e-70	0.976704	0.793	0.356	1.4e-66	5
LOC108876027	1.89e-70	0.835493	0.215	0.021	2.07e-66	5
LOC108876335	2.33e-70	0.596074	0.119	0.003	2.54e-66	5
dusp10	3.46e-70	0.807476	0.119	0.003	3.77e-66	5
acsl4	5.53e-70	0.729558	0.171	0.011	6.03e-66	5
LOC108877399	6.55e-70	0.662172	0.116	0.002	7.15e-66	5
LOC108899469	8.18e-70	0.879786	0.163	0.01	8.92e-66	5
LOC108886198	8.38e-70	0.837816	0.218	0.022	9.15e-66	5
nedd4	1.01e-69	0.571846	0.113	0.002	1.1e-65	5
hck	1.3e-69	0.523864	0.11	0.002	1.41e-65	5
smox	1.66e-69	0.770713	0.196	0.017	1.81e-65	5
rfk	1.74e-69	0.838416	0.254	0.032	1.9e-65	5
LOC108893274	2.51e-69	0.714703	0.149	0.008	2.74e-65	5
rpl35a	8.59e-69	0.892496	0.865	0.496	9.37e-65	5
gfod1	1.2e-68	0.678092	0.119	0.003	1.31e-64	5
LOC108902661	1.55e-68	0.802548	0.188	0.015	1.69e-64	5
LOC108890605	2.05e-68	0.970241	0.157	0.009	2.23e-64	5
rpl23.1	2.1e-68	1.06512	0.702	0.282	2.29e-64	5
atp5j	2.54e-68	-0.698746	0.878	0.939	2.77e-64	5
LOC108887478	2.83e-68	0.663447	0.116	0.003	3.09e-64	5
LOC108896901	2.97e-68	0.644174	0.133	0.005	3.24e-64	5
LOC108889056	8.55e-68	0.745154	0.11	0.002	9.33e-64	5
LOC108894792	8.91e-68	0.696149	0.213	0.021	9.72e-64	5
acod1	9.4e-68	1.07076	0.135	0.006	1.03e-63	5
hsp90ab1.1	9.73e-68	0.870654	0.934	0.713	1.06e-63	5
LOC108903018.1	1.15e-67	1.02816	0.392	0.084	1.25e-63	5
gpr183	1.82e-67	0.602707	0.105	0.002	1.98e-63	5
ifi35	1.91e-67	0.537516	0.105	0.002	2.08e-63	5
hspb8.2	2.48e-67	1.36716	0.343	0.067	2.71e-63	5
LOC108898915	2.58e-67	0.771088	0.92	0.667	2.81e-63	5
ccng1	4.91e-67	0.838592	0.334	0.059	5.36e-63	5
LOC108893704	6.48e-67	0.742168	0.199	0.018	7.07e-63	5
LOC108881920	6.88e-67	0.658574	0.127	0.005	7.5e-63	5
p4hb	1.52e-66	0.873387	0.271	0.039	1.65e-62	5
LOC108881924	2.17e-66	0.618876	0.124	0.004	2.36e-62	5
LOC108897453	2.34e-66	0.712054	0.146	0.008	2.55e-62	5
LOC108887968	3.07e-66	0.613913	0.113	0.003	3.35e-62	5
LOC108896232	3.17e-66	1.11361	0.155	0.009	3.45e-62	5
psap.1	4.14e-66	1.04263	0.417	0.098	4.52e-62	5
arhgap18	4.83e-66	0.741798	0.149	0.008	5.27e-62	5
cflar	5.04e-66	0.621378	0.11	0.002	5.49e-62	5
LOC108897855	1.33e-65	0.682255	0.133	0.006	1.45e-61	5
rps26.1	1.57e-65	0.925955	0.823	0.421	1.71e-61	5
dhrs1	1.58e-65	0.470659	0.102	0.002	1.73e-61	5
LOC108883751	1.92e-65	0.563901	0.102	0.002	2.09e-61	5
LOC108882026	2.32e-65	0.77134	0.185	0.016	2.53e-61	5
LOC108885063	3.78e-65	-0.718041	0.856	0.928	4.12e-61	5
LOC108898004	4.61e-65	0.618917	0.155	0.01	5.03e-61	5
LOC108872520	5.65e-65	0.737847	0.124	0.005	6.16e-61	5
tifa	6.92e-65	0.630463	0.13	0.005	7.55e-61	5
LOC108873086	8.78e-65	0.57312	0.13	0.005	9.58e-61	5
mapk6	9.42e-65	0.828382	0.279	0.043	1.03e-60	5
LOC108886808.1	1.04e-64	0.952896	0.517	0.15	1.13e-60	5
LOC108873225	2.37e-64	0.565572	0.127	0.005	2.59e-60	5
LOC108873017	2.54e-64	0.535337	0.127	0.005	2.77e-60	5
rps29.1	2.56e-64	0.901059	0.743	0.321	2.8e-60	5
fis1	2.71e-64	0.709617	0.232	0.028	2.96e-60	5
rpl37.1	2.77e-64	0.886397	0.793	0.391	3.02e-60	5
rpl29.2	3.04e-64	0.917558	0.735	0.313	3.32e-60	5
lcp1	4.58e-64	0.607192	0.119	0.004	4.99e-60	5
pacsin2	1e-63	0.661159	0.166	0.012	1.09e-59	5
marveld1	1.07e-63	0.598557	0.116	0.004	1.16e-59	5
bsg.1	1.08e-63	0.964783	0.403	0.094	1.18e-59	5
paip2	1.92e-63	0.862091	0.307	0.054	2.1e-59	5
efhd2	2.69e-63	0.738104	0.196	0.019	2.94e-59	5
LOC108898536	2.71e-63	0.722386	0.155	0.01	2.95e-59	5
LOC108893657.2	2.79e-63	0.930966	0.782	0.393	3.05e-59	5
LOC108887330	4.73e-63	0.926723	0.326	0.061	5.16e-59	5
LOC108883940	5.38e-63	-0.736636	0.834	0.9	5.87e-59	5
LOC108892045	5.43e-63	-0.688715	0.884	0.93	5.92e-59	5
LOC108901983	8.78e-63	0.62442	0.11	0.003	9.57e-59	5
cd74	1.12e-62	1.49321	0.221	0.027	1.23e-58	5
rasa3	1.13e-62	0.557618	0.119	0.004	1.23e-58	5
LOC108887454	1.61e-62	0.826934	0.166	0.013	1.75e-58	5
LOC108897230	1.85e-62	0.650162	0.124	0.005	2.02e-58	5
LOC108898026	2.79e-62	-0.691473	0.873	0.925	3.05e-58	5
LOC108885370	2.83e-62	-0.732291	0.854	0.906	3.09e-58	5
LOC108888424	3.7e-62	0.465426	0.105	0.002	4.03e-58	5
LOC108895784	4.01e-62	0.57609	0.116	0.004	4.37e-58	5
LOC108901915	4.2e-62	-0.441963	0.986	0.998	4.59e-58	5
rplp1.1	4.65e-62	0.910568	0.796	0.416	5.07e-58	5
atf3	5.3e-62	1.13513	0.265	0.041	5.78e-58	5
myo9b	6.64e-62	0.661248	0.182	0.017	7.25e-58	5
basp1	6.74e-62	0.875673	0.113	0.004	7.35e-58	5
gpnmb	9.9e-62	1.66231	0.119	0.005	1.08e-57	5
LOC108877826	2.65e-61	0.535385	0.11	0.003	2.89e-57	5
LOC108892148	3.87e-61	0.8972	0.182	0.017	4.22e-57	5
LOC108899540	4.44e-61	0.85056	0.116	0.004	4.84e-57	5
serp1	6.58e-61	0.870885	0.296	0.052	7.18e-57	5
dennd5a	6.88e-61	0.531591	0.108	0.003	7.5e-57	5
LOC108875861	8.01e-61	0.67825	0.155	0.011	8.74e-57	5
LOC108894568	9.62e-61	0.694028	0.116	0.004	1.05e-56	5
LOC108889123	1.24e-60	0.534628	0.105	0.003	1.36e-56	5
pla2g4a	1.3e-60	0.543319	0.105	0.003	1.42e-56	5
rpl5	1.37e-60	0.826342	0.901	0.575	1.5e-56	5
LOC108885415	3.66e-60	0.512578	0.102	0.002	3.99e-56	5
grb2	1.61e-59	0.703736	0.199	0.022	1.75e-55	5
LOC108897225	1.65e-59	0.807439	0.202	0.023	1.8e-55	5
LOC108885358	1.87e-59	0.662496	0.144	0.009	2.03e-55	5
LOC108877507	1.87e-59	0.462837	0.116	0.005	2.04e-55	5
LOC108894246	1.89e-59	-0.724884	0.787	0.901	2.06e-55	5
rpl13	2.08e-59	0.895279	0.76	0.371	2.27e-55	5
LOC108877107	2.44e-59	0.779489	0.32	0.062	2.67e-55	5
LOC108877872	2.61e-59	1.0387	0.442	0.119	2.85e-55	5
rps23	3.67e-59	0.873658	0.831	0.479	4.01e-55	5
LOC108901472	4.95e-59	1.01663	0.105	0.003	5.4e-55	5
rps5.1	7.9e-59	0.81485	0.826	0.442	8.62e-55	5
LOC108876951	1.05e-58	0.540118	0.102	0.003	1.14e-54	5
mme	1.14e-58	0.657521	0.102	0.003	1.24e-54	5
LOC108873208	1.23e-58	0.623809	0.124	0.006	1.34e-54	5
ptafr	1.38e-58	0.540504	0.102	0.003	1.5e-54	5
cebpg	1.9e-58	0.649282	0.152	0.011	2.08e-54	5
LOC108898819	2.76e-58	1.35422	0.276	0.049	3.01e-54	5
rps27a.2	5.28e-58	0.917482	0.79	0.439	5.76e-54	5
rpl18.2	5.31e-58	0.910555	0.707	0.313	5.8e-54	5
LOC108885312	5.44e-58	0.857816	0.691	0.282	5.94e-54	5
rhou	8.75e-58	0.623947	0.113	0.005	9.54e-54	5
LOC108889795	1.21e-57	0.740831	0.119	0.005	1.32e-53	5
LOC108881187	5.91e-57	0.649274	0.122	0.006	6.44e-53	5
LOC108876656	1.01e-56	-0.719166	0.826	0.896	1.1e-52	5
LOC108878224	1.01e-56	0.687231	0.185	0.02	1.1e-52	5
LOC108900293	1.32e-56	0.621699	0.108	0.004	1.44e-52	5
LOC108893584	1.64e-56	0.571296	0.124	0.007	1.79e-52	5
rpl32	1.97e-56	0.86903	0.796	0.422	2.15e-52	5
LOC108885478	3.26e-56	0.64337	0.127	0.007	3.55e-52	5
pdcd6ip	3.32e-56	0.738185	0.218	0.03	3.62e-52	5
rps12	4.79e-56	0.799253	0.845	0.523	5.22e-52	5
chac1	5.91e-56	0.768492	0.282	0.05	6.44e-52	5
ccnb1	5.95e-56	-0.636712	0.854	0.914	6.49e-52	5
LOC108884628	9.31e-56	0.659982	0.13	0.008	1.02e-51	5
rpl34	9.63e-56	0.82644	0.79	0.434	1.05e-51	5
dusp6	1.15e-55	0.583129	0.116	0.005	1.26e-51	5
lamtor1	1.18e-55	0.533826	0.141	0.01	1.29e-51	5
rpl27a	1.8e-55	0.843066	0.801	0.435	1.96e-51	5
hivep2	5.62e-55	0.438916	0.119	0.006	6.13e-51	5
LOC108897978	7.15e-55	0.603668	0.105	0.004	7.8e-51	5
LOC108900822	1.05e-54	0.569268	0.146	0.011	1.14e-50	5
LOC108900360	2.07e-54	0.701916	0.11	0.005	2.26e-50	5
rps21.1	2.29e-54	0.899143	0.715	0.329	2.5e-50	5
optn	6.41e-54	0.486076	0.119	0.006	6.99e-50	5
igf2r	6.62e-54	0.56705	0.113	0.005	7.23e-50	5
LOC108895376	7.08e-54	0.799305	0.815	0.482	7.73e-50	5
pim1	8.52e-54	0.55288	0.13	0.008	9.29e-50	5
LOC108884025	9.55e-54	0.754445	0.122	0.007	1.04e-49	5
LOC108895008	1.23e-53	0.783387	0.273	0.05	1.34e-49	5
mboat2	3.23e-53	0.386558	0.105	0.004	3.52e-49	5
gabarap.1	3.78e-53	0.800554	0.436	0.124	4.13e-49	5
LOC108874349	3.81e-53	0.520083	0.11	0.005	4.16e-49	5
LOC108877329	7.93e-53	-0.731054	0.787	0.862	8.66e-49	5
LOC108896812	1.33e-52	0.793892	0.251	0.043	1.45e-48	5
rps15.1	1.71e-52	0.824648	0.751	0.383	1.87e-48	5
LOC108891683	2.88e-52	0.705588	0.34	0.076	3.14e-48	5
LOC108872753.2	3.58e-52	0.871751	0.74	0.386	3.9e-48	5
rpl7a.1	4.22e-52	0.804399	0.826	0.491	4.6e-48	5
csde1.1	4.62e-52	0.812582	0.506	0.164	5.04e-48	5
mras	1.36e-51	0.603827	0.146	0.013	1.48e-47	5
LOC108872698	1.7e-51	0.765599	0.185	0.023	1.85e-47	5
ptpn4	1.83e-51	0.732278	0.171	0.019	2e-47	5
LOC108873575	2.34e-51	0.741112	0.163	0.017	2.55e-47	5
zar1	5.31e-51	-0.626797	0.884	0.932	5.79e-47	5
atp6ap2	6.91e-51	0.629516	0.215	0.032	7.54e-47	5
LOC108872713	1.24e-50	0.474489	0.105	0.005	1.35e-46	5
LOC108884461	1.34e-50	0.724886	0.113	0.006	1.46e-46	5
slc38a10	1.49e-50	0.587749	0.113	0.006	1.63e-46	5
LOC108900274	1.9e-50	-0.764849	0.713	0.829	2.07e-46	5
mmd	3.54e-50	0.517184	0.102	0.005	3.86e-46	5
LOC108873756	4.48e-50	0.716434	0.249	0.044	4.89e-46	5
rpl9.2	6.38e-50	0.794197	0.768	0.399	6.96e-46	5
trim62	6.65e-50	0.502618	0.11	0.006	7.25e-46	5
rps14.1	1.15e-49	0.790439	0.743	0.365	1.25e-45	5
elf4	1.81e-49	0.63634	0.113	0.007	1.97e-45	5
rhob	2.05e-49	0.568434	0.133	0.011	2.24e-45	5
kmt2b	7.43e-49	0.619426	0.122	0.008	8.1e-45	5
rps18	3.24e-48	0.723473	0.837	0.533	3.53e-44	5
tuft1	3.43e-48	0.634308	0.119	0.008	3.74e-44	5
LOC108897140	3.71e-48	0.530537	0.108	0.006	4.05e-44	5
slc44a4	4.26e-48	0.652955	0.188	0.025	4.65e-44	5
LOC108880298	4.47e-48	-0.75849	0.715	0.834	4.88e-44	5
hspbp1	4.81e-48	1.04656	0.204	0.031	5.25e-44	5
gpd2	7.6e-48	0.518637	0.11	0.007	8.29e-44	5
fnip1	8.68e-48	0.521055	0.122	0.009	9.47e-44	5
LOC108883941	9.78e-48	-0.673549	0.82	0.871	1.07e-43	5
ddx21	1.62e-47	0.762222	0.387	0.106	1.77e-43	5
tmem131	3.45e-47	0.592171	0.155	0.017	3.76e-43	5
LOC108888899	6.94e-47	0.884217	0.182	0.025	7.57e-43	5
app	1.05e-46	0.791014	0.146	0.015	1.14e-42	5
LOC108894289	1.25e-46	0.745703	0.66	0.285	1.36e-42	5
snx11	1.87e-46	0.55776	0.113	0.008	2.04e-42	5
LOC108883530	3.23e-46	0.605275	0.138	0.013	3.53e-42	5
rpl38	4.02e-46	0.730992	0.743	0.346	4.39e-42	5
ccna2	4.98e-46	-0.733981	0.693	0.838	5.44e-42	5
sptssa	7.47e-46	0.525178	0.138	0.013	8.15e-42	5
LOC108889027	7.62e-46	0.768765	0.254	0.05	8.32e-42	5
LOC108896837	1.5e-45	0.526297	0.113	0.008	1.63e-41	5
angptl4	2.25e-45	0.640204	0.13	0.011	2.45e-41	5
LOC108875423	2.39e-45	0.539073	0.105	0.006	2.61e-41	5
LOC108898567	2.57e-45	0.536368	0.105	0.006	2.81e-41	5
LOC108894218	2.91e-45	0.72789	0.235	0.044	3.18e-41	5
mpp1	5.52e-45	0.655816	0.144	0.015	6.03e-41	5
ankrd11	8.69e-45	0.81138	0.218	0.038	9.48e-41	5
perp	1.21e-44	0.504526	0.102	0.006	1.32e-40	5
cunh6orf62	2.04e-44	0.670024	0.171	0.023	2.22e-40	5
jun	5.79e-44	0.748082	0.18	0.026	6.32e-40	5
zfyve9	6.44e-44	0.561016	0.113	0.008	7.02e-40	5
LOC108881237	7.65e-44	0.890094	0.34	0.091	8.34e-40	5
LOC108875722	9e-44	0.433432	0.113	0.008	9.81e-40	5
rpl31.1	1.29e-43	0.75476	0.793	0.448	1.41e-39	5
ing5	1.41e-43	0.62077	0.246	0.049	1.54e-39	5
rpl6	1.55e-43	0.687063	0.807	0.479	1.7e-39	5
LOC108899534	2.04e-43	0.505754	0.105	0.007	2.23e-39	5
eif4a2	5.04e-43	0.47925	0.113	0.009	5.5e-39	5
rps10	7.89e-43	0.679334	0.812	0.471	8.61e-39	5
itpkc	8.34e-43	0.582044	0.102	0.007	9.1e-39	5
rpl35	1.94e-42	0.658152	0.851	0.568	2.12e-38	5
LOC108881207	2.49e-42	0.729977	0.293	0.07	2.72e-38	5
slc46a2	3.56e-42	0.516524	0.116	0.01	3.88e-38	5
rab20	3.6e-42	0.587972	0.155	0.02	3.93e-38	5
rps9	5.88e-42	0.695007	0.79	0.466	6.42e-38	5
LOC108902707	7.18e-42	0.739161	0.227	0.043	7.83e-38	5
timp2	7.46e-42	0.737138	0.193	0.032	8.14e-38	5
LOC108889268.1	9.11e-42	0.776198	0.359	0.104	9.94e-38	5
rps2	1.22e-41	0.693202	0.823	0.538	1.33e-37	5
gpcpd1	1.98e-41	0.481195	0.116	0.01	2.16e-37	5
LOC108883936	2.26e-41	0.44787	0.108	0.008	2.46e-37	5
rps24	2.3e-41	0.71414	0.815	0.524	2.51e-37	5
dazap2	2.55e-41	0.593826	0.174	0.026	2.79e-37	5
snx24	2.6e-41	0.573845	0.138	0.015	2.84e-37	5
LOC108884180.1	3.47e-41	0.780479	0.406	0.13	3.78e-37	5
LOC108887468	8.9e-41	0.486614	0.116	0.01	9.71e-37	5
atf6	9.49e-41	0.508198	0.105	0.008	1.04e-36	5
rps15a	1.61e-40	0.660015	0.815	0.486	1.76e-36	5
tomm34	3.75e-40	0.502833	0.13	0.014	4.09e-36	5
pabpc1	3.94e-40	0.662735	0.508	0.185	4.29e-36	5
b4galt1	4.24e-40	0.613172	0.105	0.008	4.62e-36	5
LOC108889552	4.94e-40	0.728212	0.232	0.048	5.39e-36	5
LOC108888428	5.72e-40	0.485354	0.116	0.011	6.24e-36	5
ivns1abp	5.9e-40	0.580645	0.124	0.013	6.44e-36	5
clta	6.27e-40	0.669032	0.21	0.039	6.84e-36	5
LOC108902678	6.74e-40	0.423059	0.102	0.008	7.35e-36	5
cdk5rap2	7.36e-40	0.523143	0.108	0.009	8.03e-36	5
rragc	1.41e-39	0.794866	0.202	0.037	1.54e-35	5
dsc2	2.16e-39	0.512454	0.13	0.014	2.36e-35	5
rsrp1	4.42e-39	0.476927	0.108	0.009	4.82e-35	5
tcirg1	5.87e-39	0.558428	0.119	0.012	6.41e-35	5
LOC108886907.1	6.61e-39	0.722003	0.475	0.174	7.21e-35	5
rack1	9.81e-39	0.642293	0.773	0.438	1.07e-34	5
rpl30	1.08e-38	0.659079	0.757	0.425	1.18e-34	5
LOC108891126	1.21e-38	0.509156	0.127	0.014	1.32e-34	5
LOC108888746	1.32e-38	0.67848	0.663	0.314	1.44e-34	5
sgpl1	1.86e-38	0.531676	0.13	0.015	2.03e-34	5
cct3	2.1e-38	0.641807	0.395	0.125	2.3e-34	5
LOC108894316	2.91e-38	-0.805995	0.591	0.747	3.18e-34	5
rps4x	3.69e-38	0.627214	0.798	0.476	4.02e-34	5
LOC108898398	3.94e-38	0.6824	0.749	0.428	4.3e-34	5
nsa2	1.16e-37	0.711591	0.472	0.176	1.26e-33	5
LOC108893335	1.91e-37	-0.593313	0.812	0.853	2.08e-33	5
rpl27	2.02e-37	0.564909	0.876	0.61	2.21e-33	5
LOC108901285	2.49e-37	0.614859	0.13	0.015	2.71e-33	5
LOC108898240	9.9e-37	0.479417	0.141	0.019	1.08e-32	5
LOC108899113	1.04e-36	0.66492	0.174	0.029	1.13e-32	5
ugdh	2.2e-36	0.561687	0.221	0.047	2.4e-32	5
atp6v1a	3.37e-36	0.546436	0.185	0.034	3.67e-32	5
LOC108877296	4.04e-36	0.607522	0.702	0.354	4.41e-32	5
abi1	9.49e-36	0.547036	0.135	0.018	1.04e-31	5
LOC108887708	3.79e-35	0.599173	0.113	0.012	4.14e-31	5
tmem120a	3.79e-35	0.575787	0.16	0.026	4.14e-31	5
tmem9b	4.53e-35	0.410656	0.124	0.015	4.94e-31	5
LOC108894165.2	5.3e-35	1.13486	0.439	0.174	5.79e-31	5
LOC108876506	8.79e-35	0.486706	0.105	0.01	9.59e-31	5
fam107b	8.9e-35	0.659741	0.13	0.017	9.71e-31	5
rpl11.1	9.58e-35	0.637384	0.779	0.476	1.04e-30	5
flcn	1.06e-34	0.446419	0.122	0.015	1.15e-30	5
LOC108875735	1.23e-34	-0.722816	0.696	0.768	1.34e-30	5
LOC108898501	2.91e-34	0.48899	0.122	0.015	3.18e-30	5
LOC108883825	4.28e-34	0.500089	0.119	0.014	4.67e-30	5
LOC108880752	4.49e-34	0.503303	0.152	0.024	4.9e-30	5
kdm7a	5.12e-34	0.672202	0.213	0.047	5.58e-30	5
LOC108884849	5.8e-34	0.551386	0.16	0.027	6.33e-30	5
LOC108881930	9.89e-34	0.833497	0.119	0.015	1.08e-29	5
ywhaq	1.13e-33	0.71435	0.478	0.195	1.23e-29	5
LOC108882957	1.9e-33	0.788226	0.102	0.01	2.08e-29	5
n4bp1	2.01e-33	0.674383	0.102	0.01	2.19e-29	5
ubald2	2.44e-33	0.539966	0.102	0.01	2.67e-29	5
LOC108878453	2.5e-33	0.647677	0.152	0.025	2.73e-29	5
LOC108885629	3.39e-33	0.514632	0.169	0.03	3.7e-29	5
nccrp1	4.48e-33	0.465508	0.116	0.014	4.89e-29	5
LOC108883341	5.08e-33	-0.71507	0.627	0.738	5.55e-29	5
pdlim1	5.95e-33	0.5603	0.16	0.028	6.49e-29	5
hdlbp	1.27e-32	0.518295	0.177	0.034	1.38e-28	5
LOC108900304	1.28e-32	-0.698285	0.657	0.765	1.39e-28	5
rpl17	1.7e-32	0.555102	0.845	0.583	1.86e-28	5
sesn1	1.74e-32	0.546066	0.135	0.02	1.9e-28	5
LOC108873209	4.38e-32	0.509235	0.157	0.028	4.78e-28	5
LOC108877500	4.75e-32	0.557365	0.149	0.025	5.19e-28	5
arl6ip5	4.84e-32	0.541639	0.133	0.02	5.28e-28	5
LOC108892696	5.42e-32	0.437173	0.11	0.013	5.91e-28	5
pdcd6	7.19e-32	0.447059	0.124	0.017	7.84e-28	5
LOC108882900	1.04e-31	0.625913	0.273	0.077	1.14e-27	5
LOC108888469	1.15e-31	0.498723	0.193	0.041	1.25e-27	5
naca.1	1.27e-31	0.627509	0.682	0.37	1.39e-27	5
vdac1	1.5e-31	0.661788	0.315	0.099	1.64e-27	5
tmed10.1	1.53e-31	0.660358	0.268	0.076	1.67e-27	5
myd88	2.08e-31	0.580354	0.133	0.02	2.26e-27	5
LOC108898172	2.11e-31	0.484115	0.102	0.011	2.31e-27	5
LOC108889838	2.73e-31	0.579973	0.224	0.055	2.98e-27	5
rps8	2.76e-31	0.541372	0.87	0.604	3.01e-27	5
ptges	2.92e-31	0.528471	0.122	0.017	3.19e-27	5
LOC108887884	3.3e-31	0.516116	0.108	0.013	3.6e-27	5
pcsk5	3.35e-31	0.446269	0.108	0.013	3.66e-27	5
LOC108877649	3.37e-31	0.549256	0.315	0.098	3.68e-27	5
LOC108892037	5.13e-31	0.603591	0.37	0.129	5.6e-27	5
cpox	7.15e-31	0.394	0.146	0.024	7.8e-27	5
wt1	1.37e-30	0.358905	0.102	0.011	1.5e-26	5
LOC108878566	1.43e-30	0.579838	0.157	0.029	1.56e-26	5
LOC108883888	1.84e-30	0.493605	0.119	0.016	2.01e-26	5
LOC108901725	2.14e-30	0.56963	0.163	0.031	2.33e-26	5
rpl18a	2.81e-30	0.558855	0.768	0.467	3.06e-26	5
rps25	3.21e-30	0.541262	0.831	0.565	3.51e-26	5
LOC108882312	4.69e-30	0.499299	0.215	0.053	5.12e-26	5
LOC108875232	4.99e-30	0.432761	0.108	0.013	5.45e-26	5
gadd45g	5.69e-30	0.461118	0.105	0.013	6.21e-26	5
LOC108894389	8.98e-30	0.511094	0.133	0.021	9.8e-26	5
rpl24	1.15e-29	0.530045	0.724	0.413	1.25e-25	5
LOC108883445	1.24e-29	0.515326	0.13	0.02	1.35e-25	5
LOC108883496	1.37e-29	-0.654083	0.688	0.757	1.49e-25	5
LOC108876377	2.57e-29	0.627994	0.82	0.587	2.8e-25	5
rpl21	3.02e-29	0.522036	0.84	0.573	3.29e-25	5
rpl15	7.02e-29	0.510587	0.818	0.516	7.66e-25	5
rpl7	7.96e-29	0.511487	0.831	0.57	8.69e-25	5
metap2.1	1.13e-28	0.626439	0.337	0.116	1.23e-24	5
lgmn	1.58e-28	0.504542	0.257	0.074	1.72e-24	5
arid4b	2.1e-28	0.419796	0.11	0.015	2.29e-24	5
rps7	2.86e-28	0.556185	0.63	0.325	3.12e-24	5
rps13	3.85e-28	0.525758	0.773	0.495	4.2e-24	5
rpl8	3.9e-28	0.520895	0.785	0.513	4.25e-24	5
skil	4.3e-28	0.472789	0.102	0.013	4.7e-24	5
LOC108885638	4.59e-28	0.460259	0.152	0.029	5.01e-24	5
osbpl9	5e-28	0.419713	0.102	0.013	5.45e-24	5
LOC108893659	5.51e-28	0.514526	0.221	0.058	6.01e-24	5
antxr2	5.73e-28	0.423559	0.11	0.015	6.25e-24	5
capza2	1.48e-27	0.518522	0.376	0.142	1.62e-23	5
acsbg2	4.24e-27	0.566407	0.155	0.032	4.63e-23	5
LOC108875700	5.06e-27	0.493847	0.113	0.017	5.52e-23	5
rtn3	5.37e-27	0.546085	0.285	0.092	5.86e-23	5
cactin	5.69e-27	0.526694	0.26	0.079	6.21e-23	5
sdf4	1.08e-26	0.460743	0.146	0.029	1.18e-22	5
LOC108895413	1.21e-26	-0.808479	0.508	0.651	1.32e-22	5
eif3j.1	1.22e-26	0.498333	0.331	0.117	1.33e-22	5
nasp	1.37e-26	-0.641558	0.693	0.764	1.5e-22	5
LOC108882289	1.82e-26	0.382208	0.116	0.018	1.99e-22	5
LOC108877129	3.13e-26	0.552749	0.434	0.183	3.42e-22	5
LOC108887838	3.15e-26	0.539208	0.55	0.264	3.43e-22	5
LOC108872509	4.17e-26	-0.512168	0.809	0.821	4.55e-22	5
LOC108900468	1.26e-25	0.47145	0.453	0.194	1.37e-21	5
plekhb2	1.58e-25	0.432006	0.108	0.016	1.72e-21	5
LOC108882811.1	1.96e-25	0.517125	0.727	0.452	2.14e-21	5
atp6v1f	2.2e-25	0.508446	0.21	0.057	2.4e-21	5
asna1	2.38e-25	0.410355	0.11	0.017	2.6e-21	5
lamtor4	2.68e-25	0.541268	0.26	0.082	2.93e-21	5
LOC108873464	3.28e-25	0.608199	0.163	0.037	3.57e-21	5
LOC108884114	3.31e-25	0.462833	0.146	0.03	3.62e-21	5
rpl4	3.83e-25	0.473358	0.807	0.52	4.18e-21	5
higd1a	3.96e-25	0.529154	0.171	0.041	4.32e-21	5
LOC108885025	4.18e-25	0.429336	0.122	0.021	4.56e-21	5
LOC108887283	4.53e-25	0.700859	0.157	0.035	4.95e-21	5
rpl13a	4.79e-25	0.4835	0.826	0.557	5.23e-21	5
gnaq	6.35e-25	0.411662	0.149	0.031	6.92e-21	5
ipo7	7.08e-25	0.497412	0.18	0.045	7.72e-21	5
cdc37	7.47e-25	0.51012	0.215	0.061	8.15e-21	5
LOC108883808	9.43e-25	-0.694385	0.588	0.706	1.03e-20	5
psmd7	9.81e-25	0.460948	0.224	0.065	1.07e-20	5
LOC108877410	1.02e-24	0.538972	0.163	0.038	1.11e-20	5
LOC108888086	1.06e-24	0.534093	0.122	0.022	1.16e-20	5
LOC108896955	1.14e-24	0.459563	0.105	0.016	1.25e-20	5
glyr1	1.33e-24	0.487158	0.124	0.023	1.45e-20	5
ppp1r12c	2.93e-24	0.439378	0.108	0.017	3.19e-20	5
LOC108889988	4.15e-24	0.483896	0.202	0.056	4.53e-20	5
rnasek.1	5.07e-24	0.532601	0.257	0.084	5.54e-20	5
LOC108881410	6.06e-24	0.474729	0.351	0.135	6.61e-20	5
LOC108882983	7.3e-24	0.567924	0.282	0.098	7.97e-20	5
LOC108885009	8.76e-24	0.452179	0.721	0.427	9.56e-20	5
arhgap45	1.1e-23	0.418216	0.116	0.021	1.2e-19	5
LOC108894267	1.32e-23	0.389318	0.171	0.042	1.44e-19	5
LOC108881664	1.62e-23	0.454406	0.16	0.038	1.76e-19	5
LOC108886576	2.99e-23	-0.758877	0.541	0.653	3.26e-19	5
ap2m1	3.67e-23	0.401186	0.221	0.066	4.01e-19	5
LOC108895335	5.43e-23	0.47816	0.243	0.078	5.92e-19	5
ankrd12	7.42e-23	0.517132	0.334	0.13	8.09e-19	5
LOC108889842	1e-22	0.461703	0.232	0.073	1.09e-18	5
LOC108873681	1.59e-22	0.579924	0.102	0.017	1.73e-18	5
hexim1	1.61e-22	0.463175	0.116	0.022	1.76e-18	5
LOC108880471	1.96e-22	0.381384	0.182	0.049	2.14e-18	5
LOC108881699	2.75e-22	0.540002	0.196	0.057	3e-18	5
LOC108898047	3.16e-22	0.421969	0.138	0.03	3.45e-18	5
LOC108882812	3.77e-22	0.375352	0.251	0.083	4.11e-18	5
hspa9	3.98e-22	0.461871	0.102	0.017	4.34e-18	5
ptpn12	4.21e-22	0.422164	0.108	0.019	4.59e-18	5
cndp2	5.43e-22	0.388928	0.116	0.022	5.92e-18	5
LOC108874140	1.59e-21	0.508696	0.149	0.036	1.73e-17	5
bcap31	1.74e-21	0.472824	0.202	0.06	1.9e-17	5
ubap1	2.14e-21	0.398879	0.163	0.042	2.34e-17	5
LOC108880596	2.48e-21	0.366879	0.105	0.019	2.7e-17	5
LOC108898682.1	2.5e-21	0.53207	0.24	0.081	2.73e-17	5
ssr3	4.88e-21	0.451801	0.152	0.038	5.32e-17	5
LOC108900225	7.32e-21	0.506891	0.249	0.086	7.99e-17	5
chmp2a	9.64e-21	0.383552	0.21	0.065	1.05e-16	5
LOC108899426	1.03e-20	0.374682	0.113	0.022	1.12e-16	5
rplp0.1	1.75e-20	0.386839	0.862	0.609	1.9e-16	5
wls	1.77e-20	0.357635	0.119	0.025	1.93e-16	5
rps3a	1.84e-20	0.40353	0.829	0.559	2e-16	5
LOC108893336	2.5e-20	-0.700795	0.525	0.643	2.72e-16	5
eif2s2	2.7e-20	0.430436	0.445	0.21	2.95e-16	5
rps11	3.39e-20	0.440915	0.782	0.533	3.7e-16	5
LOC108879927	3.42e-20	-0.757457	0.448	0.587	3.73e-16	5
stx5	4e-20	0.325257	0.13	0.029	4.37e-16	5
LOC108880004	4.52e-20	-0.665756	0.483	0.62	4.93e-16	5
LOC108898823	6.05e-20	1.52896	0.199	0.067	6.6e-16	5
nectin2	6.89e-20	0.371317	0.13	0.03	7.52e-16	5
tspo	7.01e-20	0.451493	0.102	0.019	7.65e-16	5
LOC108898187.3	1e-19	1.44856	0.365	0.182	1.09e-15	5
oaz1	1.16e-19	0.356665	0.127	0.029	1.27e-15	5
LOC108879053	1.23e-19	0.395471	0.144	0.036	1.34e-15	5
LOC108893594.1	1.5e-19	0.478982	0.268	0.1	1.64e-15	5
LOC108898013	2.25e-19	0.548746	0.152	0.041	2.45e-15	5
slc3a2.1	3.07e-19	0.41882	0.309	0.125	3.35e-15	5
LOC108875184	3.45e-19	0.412244	0.152	0.041	3.76e-15	5
LOC108881730	4.11e-19	0.420604	0.265	0.101	4.48e-15	5
pim2	4.18e-19	0.584661	0.138	0.035	4.56e-15	5
LOC108879815.1	4.44e-19	0.643711	0.331	0.145	4.85e-15	5
LOC108898517	8.55e-19	0.309197	0.169	0.048	9.33e-15	5
LOC108884701	8.66e-19	0.387583	0.163	0.046	9.45e-15	5
LOC108877023	9.92e-19	0.477376	0.354	0.157	1.08e-14	5
LOC108877406	1.28e-18	0.420393	0.243	0.089	1.4e-14	5
LOC108884184	1.65e-18	0.408336	0.127	0.031	1.8e-14	5
rufy3	3.29e-18	0.30765	0.102	0.021	3.59e-14	5
LOC108880366	4.48e-18	-0.819426	0.381	0.527	4.89e-14	5
LOC108899022	5.45e-18	0.298602	0.105	0.022	5.95e-14	5
brk1	1.16e-17	0.377287	0.174	0.054	1.26e-13	5
grasp	1.21e-17	0.444046	0.113	0.026	1.32e-13	5
polr2a	1.28e-17	0.535532	0.119	0.028	1.4e-13	5
stard3	1.38e-17	0.309821	0.102	0.021	1.51e-13	5
LOC108885395	1.64e-17	0.361059	0.155	0.045	1.79e-13	5
LOC108899526	1.97e-17	0.387332	0.174	0.054	2.15e-13	5
ahcy	2.23e-17	0.424937	0.177	0.056	2.43e-13	5
mplkip	2.47e-17	0.366678	0.105	0.023	2.7e-13	5
zar1l	3.23e-17	-0.849098	0.312	0.479	3.52e-13	5
LOC108893688	3.68e-17	0.389946	0.787	0.575	4.02e-13	5
LOC108883597	3.83e-17	0.427025	0.24	0.091	4.18e-13	5
rab2a	4.65e-17	0.349369	0.119	0.029	5.07e-13	5
ube2j2	4.95e-17	0.338767	0.188	0.062	5.4e-13	5
eif3a	7.68e-17	0.434625	0.124	0.032	8.38e-13	5
LOC108885229	1e-16	0.418398	0.193	0.067	1.09e-12	5
LOC108890952	1.17e-16	-0.58684	0.58	0.659	1.28e-12	5
LOC108902662.1	1.25e-16	1.01067	0.235	0.093	1.36e-12	5
ralb	1.45e-16	0.323314	0.155	0.046	1.58e-12	5
vkorc1l1	1.49e-16	0.29759	0.155	0.046	1.62e-12	5
atg3	1.5e-16	0.272926	0.108	0.025	1.64e-12	5
rassf1	1.52e-16	0.403404	0.133	0.036	1.66e-12	5
bax	1.89e-16	0.379082	0.221	0.081	2.06e-12	5
rab10	2.46e-16	0.392337	0.191	0.066	2.68e-12	5
LOC108872514	2.54e-16	0.394333	0.257	0.103	2.77e-12	5
LOC108878511	3.72e-16	-0.487148	0.663	0.708	4.06e-12	5
rpl10a	4.36e-16	0.363532	0.754	0.498	4.76e-12	5
LOC108883933	4.37e-16	0.412782	0.207	0.075	4.76e-12	5
LOC108876473	4.44e-16	-0.681587	0.475	0.582	4.85e-12	5
cwc25	9.24e-16	0.393903	0.169	0.055	1.01e-11	5
LOC108882473	1e-15	0.633544	0.409	0.216	1.09e-11	5
lamtor3	1.1e-15	0.350581	0.224	0.086	1.2e-11	5
LOC108883462	1.29e-15	-0.547464	0.566	0.656	1.41e-11	5
LOC108881028	1.89e-15	0.317577	0.188	0.066	2.06e-11	5
LOC108874085	1.96e-15	0.326455	0.102	0.024	2.14e-11	5
LOC108898115	2.13e-15	0.306432	0.152	0.047	2.32e-11	5
LOC108881405	2.25e-15	0.269033	0.144	0.043	2.46e-11	5
hsd3b7	3e-15	0.394635	0.102	0.024	3.27e-11	5
laptm4a	3.69e-15	0.293551	0.152	0.048	4.02e-11	5
LOC108884383	4e-15	0.328813	0.644	0.391	4.36e-11	5
LOC108893360	4.4e-15	0.294311	0.367	0.176	4.8e-11	5
LOC108888623	4.49e-15	0.341384	0.79	0.579	4.9e-11	5
ctsc	4.57e-15	0.271894	0.11	0.028	4.98e-11	5
LOC108897677	5.54e-15	0.310034	0.265	0.112	6.04e-11	5
actb	6.82e-15	0.316709	0.983	0.973	7.44e-11	5
rpl22l1	7.98e-15	0.274376	0.417	0.209	8.71e-11	5
nt5dc2	1.13e-14	0.347042	0.138	0.042	1.24e-10	5
eef1g	2.52e-14	0.28766	0.787	0.533	2.74e-10	5
eif2s3	2.58e-14	0.34758	0.169	0.059	2.82e-10	5
tmbim6	3.23e-14	0.304155	0.177	0.063	3.53e-10	5
ak2	3.82e-14	0.339457	0.204	0.079	4.16e-10	5
aimp1	5.6e-14	0.35262	0.146	0.048	6.1e-10	5
arih2	6.14e-14	0.331538	0.105	0.028	6.7e-10	5
sec61b	6.4e-14	0.389823	0.282	0.129	6.98e-10	5
LOC108900167	7.52e-14	0.376937	0.188	0.071	8.2e-10	5
LOC108887696	8.27e-14	0.32551	0.144	0.047	9.02e-10	5
rgs14	1.15e-13	0.396811	0.268	0.119	1.25e-09	5
atp6v1h	1.21e-13	0.360722	0.102	0.027	1.32e-09	5
LOC108895010	1.27e-13	0.345919	0.318	0.154	1.38e-09	5
LOC108882018	1.28e-13	0.315461	0.122	0.036	1.4e-09	5
LOC108883131	2.01e-13	0.383105	0.135	0.043	2.19e-09	5
tpk1	2.18e-13	0.268741	0.122	0.036	2.37e-09	5
pno1	2.19e-13	0.328134	0.152	0.052	2.39e-09	5
larp1	2.72e-13	0.448469	0.105	0.029	2.97e-09	5
cirbp	3.62e-13	-0.423853	0.743	0.734	3.95e-09	5
LOC108886176	4.31e-13	0.345707	0.113	0.033	4.7e-09	5
LOC108895022	4.37e-13	-0.685175	0.409	0.524	4.77e-09	5
LOC108889830	4.44e-13	0.305988	0.199	0.079	4.85e-09	5
LOC108882538	5.77e-13	0.295119	0.138	0.045	6.3e-09	5
LOC108872494	6.11e-13	-0.595332	0.445	0.552	6.66e-09	5
map1lc3c	6.2e-13	-0.680877	0.39	0.509	6.77e-09	5
LOC108884115	6.82e-13	-0.542529	0.489	0.576	7.45e-09	5
LOC108892818	7.4e-13	0.484225	0.113	0.034	8.07e-09	5
atox1	8.41e-13	0.294524	0.146	0.05	9.18e-09	5
LOC108882731	8.43e-13	0.401421	0.29	0.14	9.2e-09	5
cs	8.87e-13	0.263665	0.113	0.033	9.68e-09	5
LOC108899879	1.03e-12	-0.592281	0.514	0.591	1.12e-08	5
LOC108876498	1.25e-12	0.272242	0.116	0.035	1.36e-08	5
LOC108882481	1.56e-12	-0.710267	0.414	0.514	1.71e-08	5
cct6a	6.22e-12	0.287751	0.124	0.041	6.79e-08	5
LOC108878436	9.75e-12	0.376962	0.138	0.049	1.06e-07	5
gnb1	9.82e-12	0.331698	0.227	0.102	1.07e-07	5
LOC108891774	9.86e-12	0.515768	0.182	0.075	1.08e-07	5
sec61g	9.99e-12	0.286498	0.265	0.126	1.09e-07	5
LOC108897882	1.56e-11	0.253042	0.287	0.14	1.7e-07	5
psmb7	5.47e-11	0.301437	0.171	0.07	5.97e-07	5
LOC108883315	6.91e-11	0.273555	0.227	0.104	7.54e-07	5
dnttip1	7.86e-11	0.385097	0.166	0.068	8.58e-07	5
LOC108887942	1.36e-10	-0.749764	0.221	0.357	1.48e-06	5
LOC108879547	1.63e-10	-0.634676	0.331	0.45	1.78e-06	5
LOC108880005	1.67e-10	-0.644777	0.376	0.472	1.83e-06	5
fam46c	4.05e-10	0.310873	0.238	0.116	4.42e-06	5
LOC108883367	6.47e-10	-0.668824	0.235	0.376	7.06e-06	5
gtpbp4	6.55e-10	0.263811	0.196	0.089	7.14e-06	5
LOC108885596	1.15e-09	-0.689215	0.42	0.493	1.25e-05	5
LOC108898158	1.29e-09	-0.611325	0.326	0.44	1.41e-05	5
LOC108882677.1	1.36e-09	0.483607	0.133	0.051	1.48e-05	5
LOC108899904	1.56e-09	-0.645081	0.345	0.45	1.7e-05	5
cks1b	1.74e-09	-0.641154	0.329	0.439	1.9e-05	5
LOC108884450	2.69e-09	-0.676855	0.34	0.433	2.94e-05	5
LOC108875614	2.98e-09	-0.683217	0.276	0.395	3.26e-05	5
LOC108892118	3.54e-09	1.78414	0.11	0.041	3.86e-05	5
LOC108879719	3.77e-09	-0.631925	0.279	0.396	4.12e-05	5
aldh2	3.88e-09	0.25299	0.105	0.037	4.24e-05	5
LOC108885074	4.07e-09	-0.750445	0.254	0.369	4.44e-05	5
LOC108879480	4.07e-09	-0.646125	0.298	0.413	4.44e-05	5
LOC108890317	4.63e-09	0.252018	0.149	0.063	5.05e-05	5
LOC108889490	6.22e-09	-0.678681	0.235	0.363	6.78e-05	5
rsl1d1	7.64e-09	-0.602756	0.362	0.462	8.33e-05	5
LOC108893372	1.04e-08	-0.731285	0.204	0.327	0.000113052	5
kras	1.51e-08	0.280165	0.207	0.102	0.000164237	5
mapk1	2.43e-08	0.322377	0.105	0.039	0.000264874	5
LOC108895977	2.45e-08	-0.549785	0.351	0.452	0.000266858	5
LOC108902764	2.51e-08	-0.680894	0.26	0.369	0.000273871	5
pcgf6	3.17e-08	-0.654994	0.32	0.412	0.000345702	5
hmgb2	3.59e-08	-0.560581	0.373	0.467	0.000391938	5
ckb	3.74e-08	0.258529	0.32	0.187	0.000408183	5
LOC108901562	4.11e-08	-0.327478	0.646	0.661	0.000448428	5
dnaja2	5.54e-08	0.259553	0.166	0.078	0.000604829	5
gtf3a	5.72e-08	-0.528024	0.37	0.454	0.000624116	5
ube2c	5.82e-08	-0.619308	0.249	0.36	0.000635082	5
cpeb1	6.08e-08	-0.636651	0.326	0.422	0.000663595	5
LOC108895209	1.07e-07	-0.550047	0.296	0.399	0.00117211	5
LOC108892295	1.45e-07	0.26463	0.102	0.04	0.00158736	5
LOC108876927	1.64e-07	-0.789498	0.188	0.29	0.00179421	5
snrpd3	1.96e-07	-0.687252	0.185	0.295	0.0021402	5
lsm12	2.55e-07	-0.683984	0.227	0.331	0.00278739	5
LOC108880779	2.77e-07	-0.692917	0.155	0.264	0.00301684	5
LOC108883634	3.64e-07	-0.563277	0.403	0.478	0.00397117	5
LOC108900344	4.16e-07	-0.573693	0.273	0.375	0.00454255	5
LOC108886526	4.96e-07	-0.582895	0.304	0.39	0.0054081	5
acsl5	5.87e-07	-0.631562	0.202	0.309	0.00640048	5
dnajc9	8.52e-07	-0.568487	0.218	0.325	0.00929779	5
LOC108883498	9.57e-07	-0.636509	0.251	0.343	0.0104414	5
LOC108901751	9.59e-07	-0.647457	0.13	0.235	0.0104679	5
LOC108875080	9.75e-07	-0.696043	0.105	0.204	0.0106403	5
LOC108895573	1.01e-06	-0.407851	0.586	0.587	0.0109758	5
LOC108899456	1.61e-06	-0.568287	0.155	0.26	0.0175232	5
uchl1	1.92e-06	0.48124	0.122	0.057	0.0209216	5
LOC108888640	2.3e-06	-0.629007	0.169	0.268	0.0250913	5
LOC108889361	2.52e-06	-0.696107	0.105	0.199	0.0274965	5
dut	3.29e-06	-0.563089	0.202	0.299	0.0358747	5
LOC108898660	3.75e-06	-0.59437	0.204	0.301	0.0408937	5
ccdc86	4.12e-06	-0.742379	0.157	0.249	0.0449917	5
LOC108872727	4.45e-06	-0.571994	0.238	0.327	0.0485195	5
