# Supplementary material for: Transcriptome Profiling of the Ovarian Cells at the Single-Cell Resolution in Adult Asian Seabass
Source: Frontiers journal article supplement (doi:10.3389/fcell.2021.647892), 2021-03-29
Supplement: Table_3.XLS [file Table_3.XLS]

## Sheet: enrichment_results_wg_result157
Table S3 Significantly enriched GO terms (biological processes, cellular component, molecular function) of DEGs in 5clusters.
	geneSet	description	size	overlap	expect	enrichmentRatio	pValue	FDR	overlapId	userId
Biological process	GO:1901566	organonitrogen compound biosynthetic process	744	53	12.9716	4.08584	0	0	30722;114420;116991;192299;192300;192301;321793;322614;323305;325618;327341;336568;336641;336662;336687;336713;336719;336727;336764;336812;337007;337090;337148;337240;337810;378961;393686;393725;394027;394035;394097;394166;394194;405889;406307;406565;406686;406760;415169;415229;436759;436760;445038;445040;445053;449547;450054;556556;560915;677758;735250;767765;100000341	rps26;rps27a;rps16;rps15;rpl29;rps28;rps21;rpsa;rpl11;rpl18;rpl23;rps14;rpl31;rplp1;rps29;arg2;rfk;rpl35a;rpl13;rps23;rpl32;rps12;rpl34;rps18;rpl38;rpl6;eif4a2;rpl35;rps9;rps2;rps24;rps15a;rack1;rpl30;rps4x;rpl27;ugdh;rpl17;rpl18a;rpl24;rpl21;rpl15;rps7;rps13;rpl8;rpl4;rps3a;rps11;rpl10a;rpl22l1;eif2s3;ak2;tpk1
	GO:0043603	cellular amide metabolic process	405	51	7.06117	7.2226	0	0	30722;114420;192299;192300;192301;322614;323305;325618;327341;336568;336641;336662;336687;336713;336719;336727;336764;336812;337007;337090;337148;337240;337810;378961;393686;393725;394027;394035;394097;394166;394194;405889;406307;406565;406686;406760;415169;415229;436759;436760;445038;445040;445053;449547;544666;556556;563855;677758;735250;767765;100000341	rps26;rps27a;rps16;rps15;rpl29;rps28;rps21;rpsa;rpl11;rpl18;rpl23;rps14;rpl31;rplp1;rps29;arg2;rpl35a;rpl13;rps23;rpl32;rps12;chac1;rpl34;rps18;rpl38;rpl6;eif4a2;rpl35;rps9;rps2;rps24;rps15a;rack1;rpl30;rps4x;rpl27;rpl17;ptges;rpl18a;rpl24;rpl21;rpl15;rps7;rps13;rpl8;rpl4;rps3a;rps11;rpl10a;rpl22l1;eif2s3
	GO:0006518	peptide metabolic process	322	50	5.61407	8.9062	0	0	30722;114420;192299;192300;192301;323305;325618;327341;336568;336641;336662;336687;336713;336719;336727;336764;336812;337007;337090;337148;337240;337810;378961;393686;393725;394027;394035;394097;394166;394194;405889;406307;406565;406686;406760;415169;415229;436759;436760;445038;445040;445053;449547;544666;556556;563855;677758;735250;767765;100000341	rps26;rps27a;rps16;rps15;rpl29;rps28;rps21;rpsa;rpl11;rpl18;rpl23;rps14;rpl31;rplp1;rps29;rpl35a;rpl13;rps23;rpl32;rps12;chac1;rpl34;rps18;rpl38;rpl6;eif4a2;rpl35;rps9;rps2;rps24;rps15a;rack1;rpl30;rps4x;rpl27;rpl17;ptges;rpl18a;rpl24;rpl21;rpl15;rps7;rps13;rpl8;rpl4;rps3a;rps11;rpl10a;rpl22l1;eif2s3
	GO:0043604	amide biosynthetic process	319	49	5.56176	8.81016	0	0	30722;114420;192299;192300;192301;322614;323305;325618;327341;336568;336641;336662;336687;336713;336719;336727;336764;336812;337007;337090;337148;337240;337810;378961;393686;393725;394027;394035;394097;394166;394194;405889;406307;406565;406686;406760;415169;415229;436759;436760;445038;445040;445053;449547;556556;677758;735250;767765;100000341	rps26;rps27a;rps16;rps15;rpl29;rps28;rps21;rpsa;rpl11;rpl18;rpl23;rps14;rpl31;rplp1;rps29;arg2;rpl35a;rpl13;rps23;rpl32;rps12;rpl34;rps18;rpl38;rpl6;eif4a2;rpl35;rps9;rps2;rps24;rps15a;rack1;rpl30;rps4x;rpl27;rpl17;rpl18a;rpl24;rpl21;rpl15;rps7;rps13;rpl8;rpl4;rps3a;rps11;rpl10a;rpl22l1;eif2s3
	GO:0043043	peptide biosynthetic process	284	48	4.95154	9.69396	0	0	30722;114420;192299;192300;192301;323305;325618;327341;336568;336641;336662;336687;336713;336719;336727;336764;336812;337007;337090;337148;337240;337810;378961;393686;393725;394027;394035;394097;394166;394194;405889;406307;406565;406686;406760;415169;415229;436759;436760;445038;445040;445053;449547;556556;677758;735250;767765;100000341	rps26;rps27a;rps16;rps15;rpl29;rps28;rps21;rpsa;rpl11;rpl18;rpl23;rps14;rpl31;rplp1;rps29;rpl35a;rpl13;rps23;rpl32;rps12;rpl34;rps18;rpl38;rpl6;eif4a2;rpl35;rps9;rps2;rps24;rps15a;rack1;rpl30;rps4x;rpl27;rpl17;rpl18a;rpl24;rpl21;rpl15;rps7;rps13;rpl8;rpl4;rps3a;rps11;rpl10a;rpl22l1;eif2s3
	GO:0006412	translation	282	48	4.91667	9.76271	0	0	30722;114420;192299;192300;192301;323305;325618;327341;336568;336641;336662;336687;336713;336719;336727;336764;336812;337007;337090;337148;337240;337810;378961;393686;393725;394027;394035;394097;394166;394194;405889;406307;406565;406686;406760;415169;415229;436759;436760;445038;445040;445053;449547;556556;677758;735250;767765;100000341	rps26;rps27a;rps16;rps15;rpl29;rps28;rps21;rpsa;rpl11;rpl18;rpl23;rps14;rpl31;rplp1;rps29;rpl35a;rpl13;rps23;rpl32;rps12;rpl34;rps18;rpl38;rpl6;eif4a2;rpl35;rps9;rps2;rps24;rps15a;rack1;rpl30;rps4x;rpl27;rpl17;rpl18a;rpl24;rpl21;rpl15;rps7;rps13;rpl8;rpl4;rps3a;rps11;rpl10a;rpl22l1;eif2s3
	GO:0044271	cellular nitrogen compound biosynthetic process	1806	73	31.4876	2.31837	1.56986e-13	8.99303e-11	30722;114420;117603;140614;140815;140816;192299;192300;192301;321793;322614;323305;325287;325618;327341;335916;336568;336641;336662;336687;336713;336719;336727;336764;336812;337007;337090;337148;337240;337810;378961;393686;393725;393939;394027;394035;394097;394166;394194;404040;405889;406307;406565;406686;406760;415133;415169;415229;436585;436759;436760;436895;445038;445040;445053;449547;450054;4…	ddit3;rps26;rps27a;rps16;rps15;rpl29;rps28;rps21;fosb;rpsa;rpl11;rpl18;rpl23;rps14;rpl31;rplp1;rps29;hic1;xbp1;dab2;mafk;irf8;cebpa;mafb;klf3;fosl2;arg2;wbp2nl;arid5a;rfk;rpl35a;atf3;rpl13;rps23;cebpg;rpl32;rps12;rpl34;rps18;rpl38;jun;rpl6;eif4a2;rpl35;rps9;rps2;rps24;atf6;rps15a;rack1;rpl30;rps4x;rpl27;rpl17;rpl18a;rpl24;rpl21;rpl15;arid4b;rps7;rps13;rpl8;rpl4;hexim1;rps3a;rps11;polr2a;rpl10a;rp…
	GO:0009059	macromolecule biosynthetic process	1852	70	32.2896	2.16788	1.83121e-11	9.17895e-09	30722;114420;116991;117603;140614;140815;140816;192299;192300;192301;323305;325287;325618;327341;335916;336568;336641;336662;336687;336713;336719;336727;336764;336812;337007;337090;337148;337240;337810;378961;393686;393725;393939;394027;394035;394097;394166;394194;404040;405889;406307;406565;406686;406760;415133;415169;415229;436585;436759;436760;436895;445038;445040;445053;449547;492346;553347;5…	ddit3;rps26;rps27a;rps16;rps15;rpl29;rps28;rps21;fosb;rpsa;rpl11;rpl18;rpl23;rps14;rpl31;rplp1;rps29;hic1;xbp1;dab2;mafk;irf8;cebpa;mafb;klf3;fosl2;wbp2nl;arid5a;rpl35a;atf3;rpl13;rps23;cebpg;rpl32;rps12;rpl34;rps18;rpl38;jun;rpl6;eif4a2;rpl35;rps9;rps2;rps24;atf6;rps15a;rack1;rpl30;rps4x;rpl27;ugdh;rpl17;rpl18a;rpl24;rpl21;rpl15;arid4b;rps7;rps13;rpl8;rpl4;hexim1;rps3a;rps11;polr2a;rpl10a;rpl22l…
	GO:0034645	cellular macromolecule biosynthetic process	1826	68	31.8363	2.13593	8.51543e-11	3.7941e-08	30722;114420;117603;140614;140815;140816;192299;192300;192301;323305;325618;327341;335916;336568;336641;336662;336687;336713;336719;336727;336764;336812;337007;337090;337148;337240;337810;378961;393686;393725;393939;394027;394035;394097;394166;394194;404040;405889;406307;406565;406686;406760;415133;415169;415229;436585;436759;436760;436895;445038;445040;445053;449547;492346;553347;555238;556556;5…	ddit3;rps26;rps27a;rps16;rps15;rpl29;rps28;rps21;fosb;rpsa;rpl11;rpl18;rpl23;rps14;rpl31;rplp1;rps29;hic1;xbp1;dab2;mafk;irf8;cebpa;mafb;klf3;fosl2;arid5a;rpl35a;atf3;rpl13;rps23;cebpg;rpl32;rps12;rpl34;rps18;rpl38;jun;rpl6;eif4a2;rpl35;rps9;rps2;rps24;atf6;rps15a;rack1;rpl30;rps4x;rpl27;rpl17;rpl18a;rpl24;rpl21;rpl15;arid4b;rps7;rps13;rpl8;rpl4;hexim1;rps3a;rps11;polr2a;rpl10a;rpl22l1;eif2s3;pcg…
	GO:0002181	cytoplasmic translation	50	11	0.871749	12.6183	6.86503e-10	2.75288e-07	327341;336641;336719;336727;393686;394166;406307;436760;445040;445053;677758	rpl29;rps28;rps21;rpl31;rplp1;rpl35a;rpl6;rpl17;rpl15;rpl8;eif2s3
Cellular component	GO:0043228	non-membrane-bounded organelle	1278	57	16.521	3.45015	0	0	30722;114420;192299;192300;192301;323305;325287;325618;327327;335916;336568;336641;336662;336687;336710;336713;336719;336727;336764;336812;337007;337090;337148;337240;337810;378961;393520;393686;393725;393788;394027;394035;394097;394121;394166;394194;404601;405889;406307;406565;406686;415169;415187;415229;436759;436760;445038;445040;445053;449547;556556;560956;677758;735250;767765;791998;100000341	rps26;rps27a;rps16;rps15;rpl29;rps28;rps21;rpsa;rpl11;rpl18;rpl23;rps14;rpl31;rplp1;rps29;cdc42se1;wbp2nl;rpl35a;pacsin2;myo9b;rpl13;rps23;rpl32;rps12;rpl34;rps18;rpl38;jun;rpl6;rps10;rpl35;rps9;rps2;rps24;rps15a;rack1;rpl30;rps4x;rpl27;n4bp1;rpl17;rpl18a;rps25;rpl24;rpl21;rpl15;rpl7;rps7;rps13;rpl8;rpl4;rps3a;rps11;brk1;rpl10a;rpl22l1;pno1
	GO:0043232	intracellular non-membrane-bounded organelle	1278	57	16.521	3.45015	0	0	30722;114420;192299;192300;192301;323305;325287;325618;327327;335916;336568;336641;336662;336687;336710;336713;336719;336727;336764;336812;337007;337090;337148;337240;337810;378961;393520;393686;393725;393788;394027;394035;394097;394121;394166;394194;404601;405889;406307;406565;406686;415169;415187;415229;436759;436760;445038;445040;445053;449547;556556;560956;677758;735250;767765;791998;100000341	rps26;rps27a;rps16;rps15;rpl29;rps28;rps21;rpsa;rpl11;rpl18;rpl23;rps14;rpl31;rplp1;rps29;cdc42se1;wbp2nl;rpl35a;pacsin2;myo9b;rpl13;rps23;rpl32;rps12;rpl34;rps18;rpl38;jun;rpl6;rps10;rpl35;rps9;rps2;rps24;rps15a;rack1;rpl30;rps4x;rpl27;n4bp1;rpl17;rpl18a;rps25;rpl24;rpl21;rpl15;rpl7;rps7;rps13;rpl8;rpl4;rps3a;rps11;brk1;rpl10a;rpl22l1;pno1
	GO:0005829	cytosol	570	59	7.36852	8.00703	0	0	30573;30722;114420;116991;192299;192300;192301;321107;321739;323305;325618;327341;336568;336641;336662;336687;336710;336713;336719;336727;336764;336812;337007;337090;337148;337240;337810;353314;378961;387530;393268;393686;393725;394027;394035;394097;394121;394166;405889;406307;406565;406686;415169;415229;436759;436760;445038;445040;445053;449547;554477;556556;558347;563855;677758;735250;767765;77…	rps26;rps27a;rps16;rps15;rpl29;rps28;rps21;rpsa;rpl11;rpl18;rpl23;rps14;rpl31;rplp1;rps29;pfkfb3;rap1b;rpl35a;hsp90ab1;rpl13;rps23;rpl32;rps12;chac1;rpl34;dusp6;rps18;rpl38;rpl6;rps10;rpl35;rps9;rps2;rps15a;rack1;rpl30;rps4x;rpl27;ugdh;rpl17;rpl18a;rpl24;rpl21;rpl15;rpl7;rps7;rps13;rpl8;osbpl9;rpl4;ipo7;rps3a;rps11;ahcy;rpl10a;rpl22l1;eif2s3;map1lc3c;atox1
	GO:1990904	ribonucleoprotein complex	380	51	4.91235	10.382	0	0	30722;114420;192299;192300;192301;321769;323305;325618;336568;336641;336662;336687;336710;336713;336719;336727;336764;336812;337007;337090;337148;337240;337810;378961;393686;393725;393788;394027;394035;394097;394121;394166;394194;405889;406307;406565;406686;415169;415229;436759;436760;445038;445040;445053;449547;556556;563247;677758;735250;767765;100000341	rps26;rps27a;rps16;rps15;rpl29;rps28;rps21;rpsa;rpl11;rpl18;rpl23;rps14;rpl31;rplp1;rps29;rpl35a;rpl13;rps23;rpl32;rps12;rpl34;rps18;rpl38;rpl6;rps10;rpl35;rps9;rps2;rps24;rps15a;rack1;rpl30;rps4x;nsa2;rpl27;rpl17;rpl18a;rps25;rpl24;rpl21;rpl15;rpl7;rps7;rps13;rpl8;rpl4;rps3a;rps11;rpl10a;rpl22l1;rsl1d1
	GO:0005840	ribosome	129	49	1.66761	29.3833	0	0	30722;114420;192299;192300;192301;323305;325618;336568;336641;336662;336687;336710;336713;336719;336727;336764;336812;337007;337090;337148;337240;337810;378961;393686;393725;393788;394027;394035;394097;394121;394166;394194;405889;406307;406565;406686;415169;415229;436759;436760;445038;445040;445053;449547;556556;677758;735250;767765;100000341	rps26;rps27a;rps16;rps15;rpl29;rps28;rps21;rpsa;rpl11;rpl18;rpl23;rps14;rpl31;rplp1;rps29;rpl35a;rpl13;rps23;rpl32;rps12;rpl34;rps18;rpl38;rpl6;rps10;rpl35;rps9;rps2;rps24;rps15a;rack1;rpl30;rps4x;rpl27;rpl17;rpl18a;rps25;rpl24;rpl21;rpl15;rpl7;rps7;rps13;rpl8;rpl4;rps3a;rps11;rpl10a;rpl22l1
	GO:0044445	cytosolic part	115	45	1.48663	30.2698	0	0	30722;114420;192299;192301;323305;325618;336568;336641;336662;336687;336710;336713;336719;336727;336764;336812;337007;337090;337148;337240;337810;378961;393686;393725;394027;394035;394121;394166;405889;406307;406565;406686;415169;415229;436759;436760;445038;445040;445053;449547;556556;677758;735250;767765;100000341	rps26;rps27a;rps16;rps15;rpl29;rps28;rps21;rpsa;rpl11;rpl18;rpl23;rps14;rpl31;rplp1;rps29;rpl35a;rpl13;rps23;rpl32;rps12;rpl38;rpl6;rps10;rpl35;rps9;rps2;rps15a;rack1;rpl30;rps4x;rpl27;rpl17;rpl18a;rpl24;rpl21;rpl15;rpl7;rps7;rps13;rpl8;rpl4;rps3a;rps11;rpl10a;rpl22l1
	GO:0044391	ribosomal subunit	99	45	1.2798	35.1618	0	0	30722;114420;192299;192301;323305;325618;336568;336641;336662;336687;336710;336713;336719;336727;336764;336812;337007;337090;337148;337240;337810;378961;393686;393725;394027;394035;394121;394166;405889;406307;406565;406686;415169;415229;436759;436760;445038;445040;445053;449547;556556;677758;735250;767765;100000341	rps26;rps27a;rps16;rps15;rpl29;rps28;rps21;rpsa;rpl11;rpl18;rpl23;rps14;rpl31;rplp1;rps29;rpl35a;rpl13;rps23;rpl32;rps12;rpl38;rpl6;rps10;rpl35;rps9;rps2;rps15a;rack1;rpl30;rps4x;rpl27;rpl17;rpl18a;rpl24;rpl21;rpl15;rpl7;rps7;rps13;rpl8;rpl4;rps3a;rps11;rpl10a;rpl22l1
	GO:0022626	cytosolic ribosome	66	45	0.853198	52.7428	0	0	30722;114420;192299;192301;323305;325618;336568;336641;336662;336687;336710;336713;336719;336727;336764;336812;337007;337090;337148;337240;337810;378961;393686;393725;394027;394035;394121;394166;405889;406307;406565;406686;415169;415229;436759;436760;445038;445040;445053;449547;556556;677758;735250;767765;100000341	rps26;rps27a;rps16;rps15;rpl29;rps28;rps21;rpsa;rpl11;rpl18;rpl23;rps14;rpl31;rplp1;rps29;rpl35a;rpl13;rps23;rpl32;rps12;rpl38;rpl6;rps10;rpl35;rps9;rps2;rps15a;rack1;rpl30;rps4x;rpl27;rpl17;rpl18a;rpl24;rpl21;rpl15;rpl7;rps7;rps13;rpl8;rpl4;rps3a;rps11;rpl10a;rpl22l1
	GO:0015935	small ribosomal subunit	36	21	0.46538	45.1244	0	0	30722;114420;336662;336687;336764;337007;337148;337240;337810;393725;394027;394121;394166;405889;406307;406565;406686;415169;449547;767765;100000341	rps26;rps27a;rps16;rps15;rps28;rps21;rpsa;rps14;rps29;rps23;rps12;rps10;rps9;rps2;rps15a;rack1;rps4x;rps7;rps13;rps3a;rps11
	GO:0022627	cytosolic small ribosomal subunit	28	21	0.361963	58.017	0	0	30722;114420;336662;336687;336764;337007;337148;337240;337810;393725;394027;394121;394166;405889;406307;406565;406686;415169;449547;767765;100000341	rps26;rps27a;rps16;rps15;rps28;rps21;rpsa;rps14;rps29;rps23;rps12;rps10;rps9;rps2;rps15a;rack1;rps4x;rps7;rps13;rps3a;rps11
Molecular function	GO:0005198	structural molecule activity	328	53	5.55714	9.53727	0	0	114420;192299;192300;192301;323305;325618;336568;336641;336662;336687;336710;336713;336719;336727;336764;336812;337007;337090;337148;337240;337810;378961;393686;393725;394027;394035;394097;394121;394166;394194;405889;406307;406318;406565;406686;415169;415229;436759;436760;445038;445040;445053;449547;497317;553597;556556;561019;677758;735250;767765;791998;100000341;100329656	rps26;rps27a;rps16;rps15;rpl29;rps28;rps21;rpsa;rpl11;rpl18;rpl23;rps14;rpl31;rplp1;rps29;cdc42se1;rpl35a;marveld1;rpl13;rps23;rpl32;rps12;rpl34;lamtor1;rps18;rpl38;rpl6;rps10;rpl35;rps9;rps2;rps24;rps15a;clta;rpl30;rps4x;rpl27;rpl17;rpl18a;rpl24;rpl21;rpl15;rpl7;rps7;rps13;rpl8;lamtor4;rpl4;rps3a;rps11;rpl10a;lamtor3;rpl22l1
	GO:0003735	structural constituent of ribosome	107	47	1.81285	25.926	0	0	114420;192299;192300;192301;323305;325618;336568;336641;336662;336687;336710;336713;336719;336727;336764;336812;337007;337090;337148;337240;337810;378961;393686;393725;394027;394035;394097;394121;394166;394194;405889;406307;406565;406686;415169;415229;436759;436760;445038;445040;445053;449547;556556;677758;735250;767765;100000341	rps26;rps27a;rps16;rps15;rpl29;rps28;rps21;rpsa;rpl11;rpl18;rpl23;rps14;rpl31;rplp1;rps29;rpl35a;rpl13;rps23;rpl32;rps12;rpl34;rps18;rpl38;rpl6;rps10;rpl35;rps9;rps2;rps24;rps15a;rpl30;rps4x;rpl27;rpl17;rpl18a;rpl24;rpl21;rpl15;rpl7;rps7;rps13;rpl8;rpl4;rps3a;rps11;rpl10a;rpl22l1
	GO:0019843	rRNA binding	21	7	0.355793	19.6744	3.37882e-08	1.24003e-05	114420;192300;336687;336812;393686;415169;449547	rpl23;rps14;rps18;rps9;rps4x;rps13;rpl8
	GO:0003723	RNA binding	522	25	8.84399	2.82678	2.25692e-06	0.000621218	114420;192299;192300;192301;323305;327327;327341;336662;336687;336713;336727;336812;337148;393520;393686;406565;406760;415169;445053;449547;562319;563247;735250;767765;799650	rps26;rps16;rps15;rpl23;rps14;rps18;ddx21;rpl6;eif4a2;rpl35;rps9;rps2;rpl30;rps4x;n4bp1;rpl24;rpl15;rps13;rpl8;hexim1;rpl10a;rpl22l1;eif2s3;pno1;rsl1d1
	GO:0070530	K63-linked polyubiquitin modification-dependent protein binding	8	3	0.13554	22.1337	0.000251438	0.0553666	336159;406452;564279	sqstm1;tnip2;optn
	GO:0017017	MAP kinase tyrosine/serine/threonine phosphatase activity	10	3	0.169425	17.7069	0.000525477	0.08265	114436;353314;100034609	dusp5;dusp10;dusp6
	GO:0033549	MAP kinase phosphatase activity	10	3	0.169425	17.7069	0.000525477	0.08265	114436;353314;100034609	dusp5;dusp10;dusp6
	GO:0000978	RNA polymerase II proximal promoter sequence-specific DNA binding	105	7	1.77896	3.93487	0.00200567	0.245962	335916;393939;415133;492346;558071;558921;100537332	fosb;mafk;mafb;fosl2;atf3;jun;atf6
	GO:0019899	enzyme binding	421	16	7.1328	2.24316	0.00208395	0.245962	30573;30722;321739;337810;406417;406452;407694;445199;550134;553597;561019;570218;678628;791986;791998;100329656	rps27a;sqstm1;ubb;fmnl3;cdc42se1;hsp90ab1;lamtor1;rack1;flcn;lamtor4;ipo7;ppp1r12c;lamtor3;arih2;sec61b;cks1b
	GO:0000987	proximal promoter sequence-specific DNA binding	107	7	1.81285	3.86133	0.00223399	0.245962	335916;393939;415133;492346;558071;558921;100537332	fosb;mafk;mafb;fosl2;atf3;jun;atf6
